# Supplementary material for: FRET-based cyanine probes for monitoring ligation reactions and their applications to mechanistic studies and catalyst screening
Source: Royal Society of Chemistry journal article supplement (doi:10.1039/c5ob02127h), 2016-01-01

Compound **5a** -  $^1\text{H}$  NMR spectrum in  $\text{CDCl}_3$

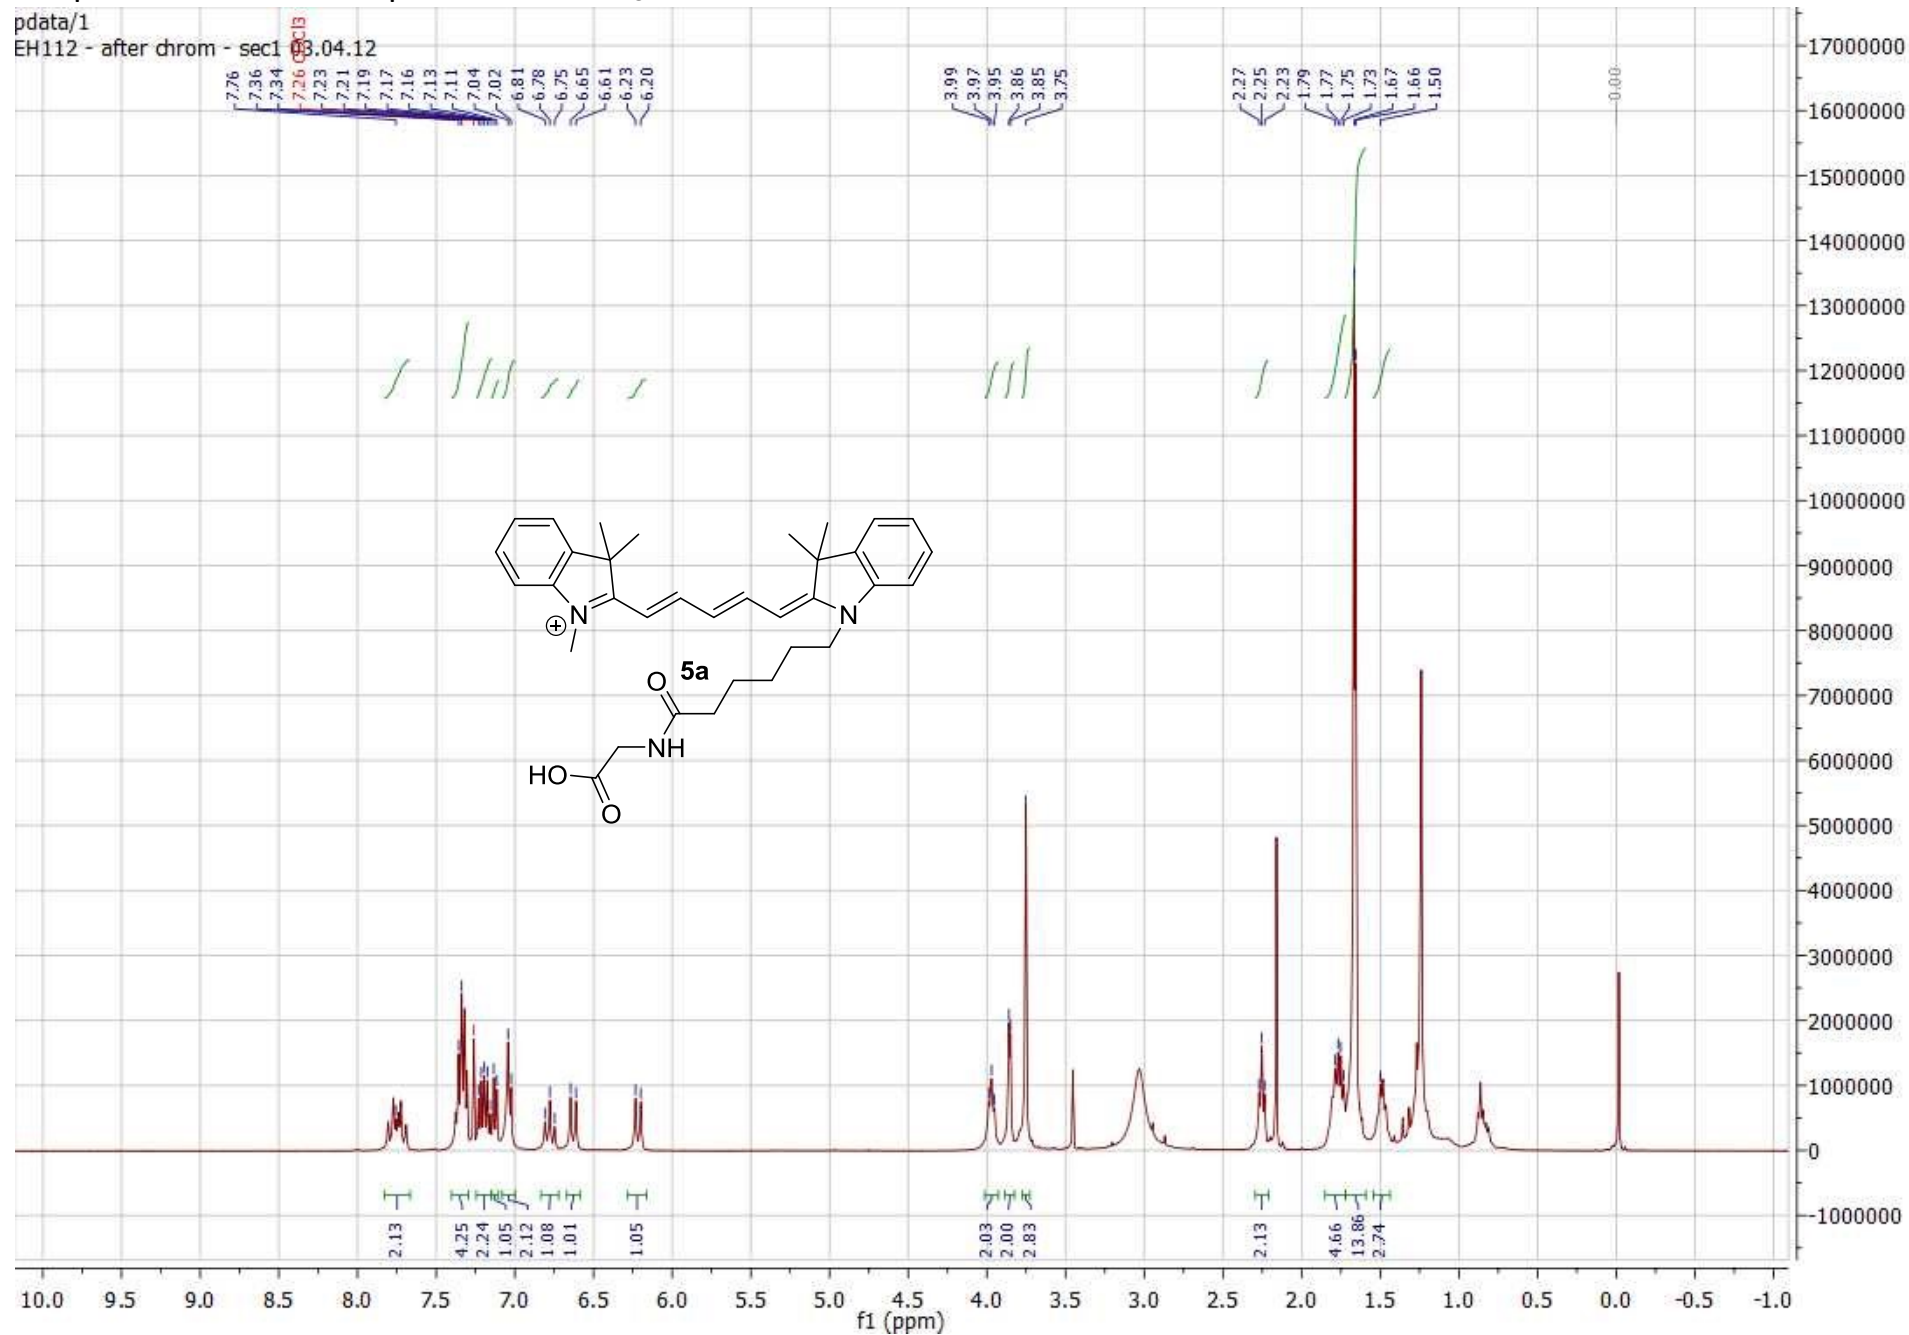

Compound **5a** - MS (ESI+):  $m/z$  calc. for  $C_{34}H_{42}N_3O_3^+$ : 540.32 ; found: 540.5  $[M]^+$

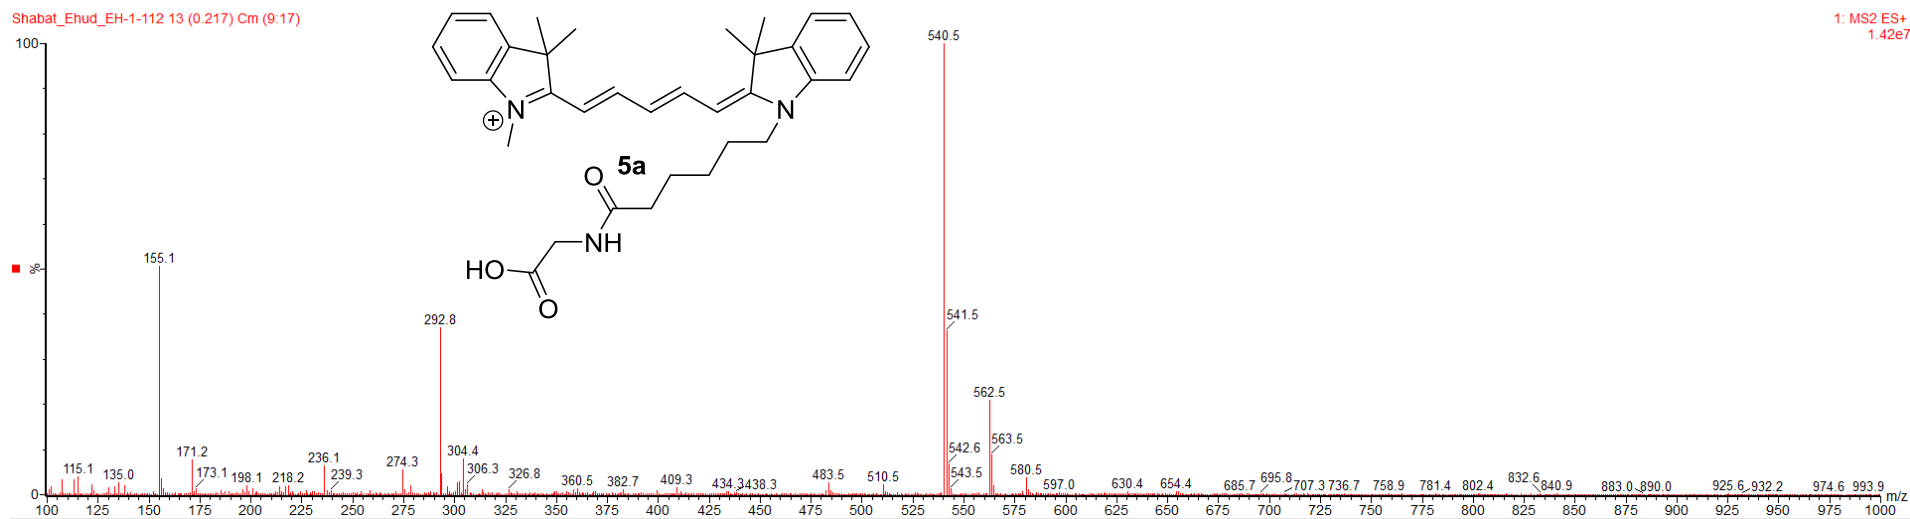

Compound **2a** -  $^1\text{H}$  NMR spectrum in  $\text{CDCl}_3$

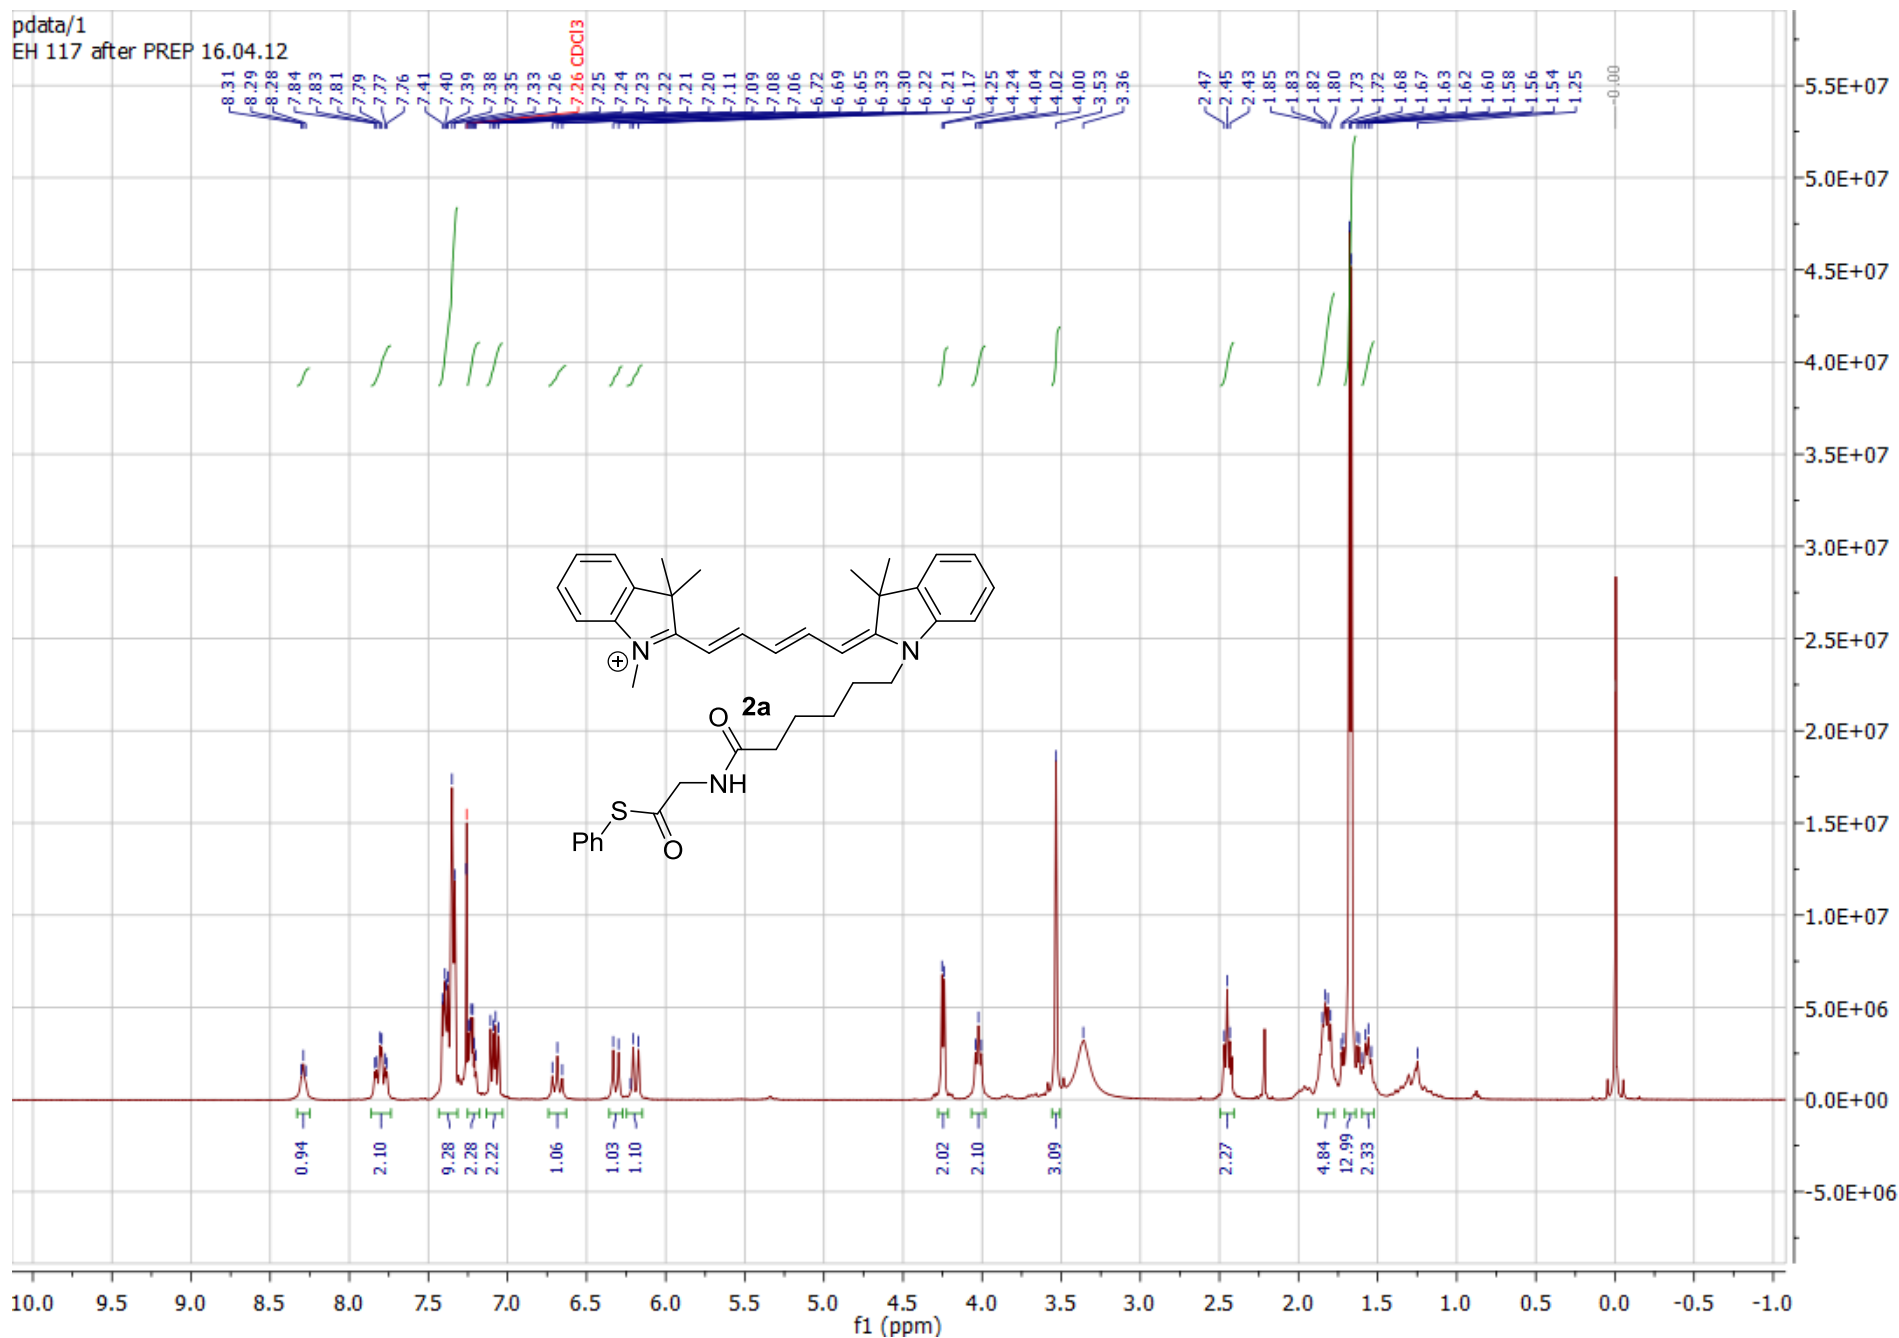

Compound **2a** - MS (ESI+):  $m/z$  calc. for  $C_{40}H_{46}N_3O_2S^+$ : 632.33 ; found: 632.3  $[M]^+$

EH - 117

Shabat176 63 (2.788) Cm (61:80-5:34)

Ehud Herbust

1: TOF MS ES+  
4.21e6

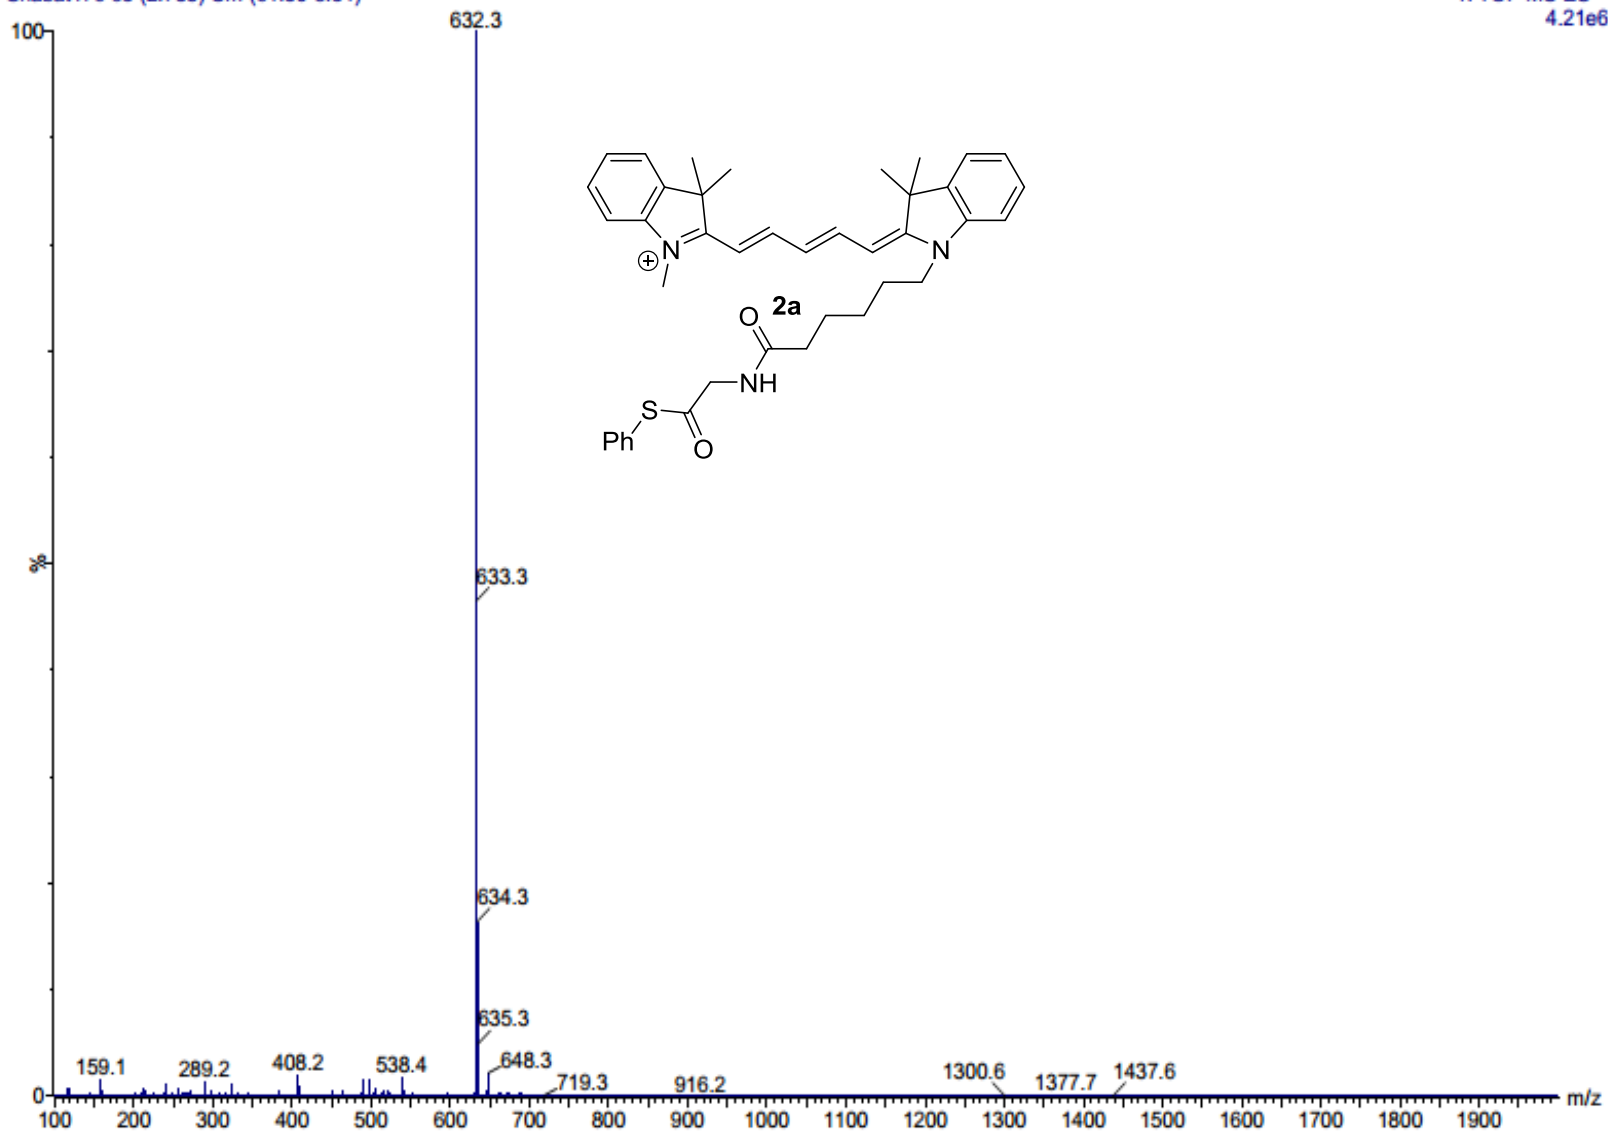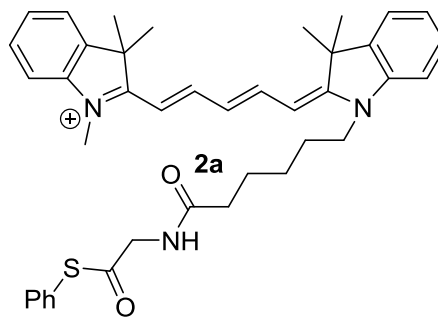

Compound **8** -  $^1\text{H}$  NMR spectrum in  $\text{CDCl}_3$

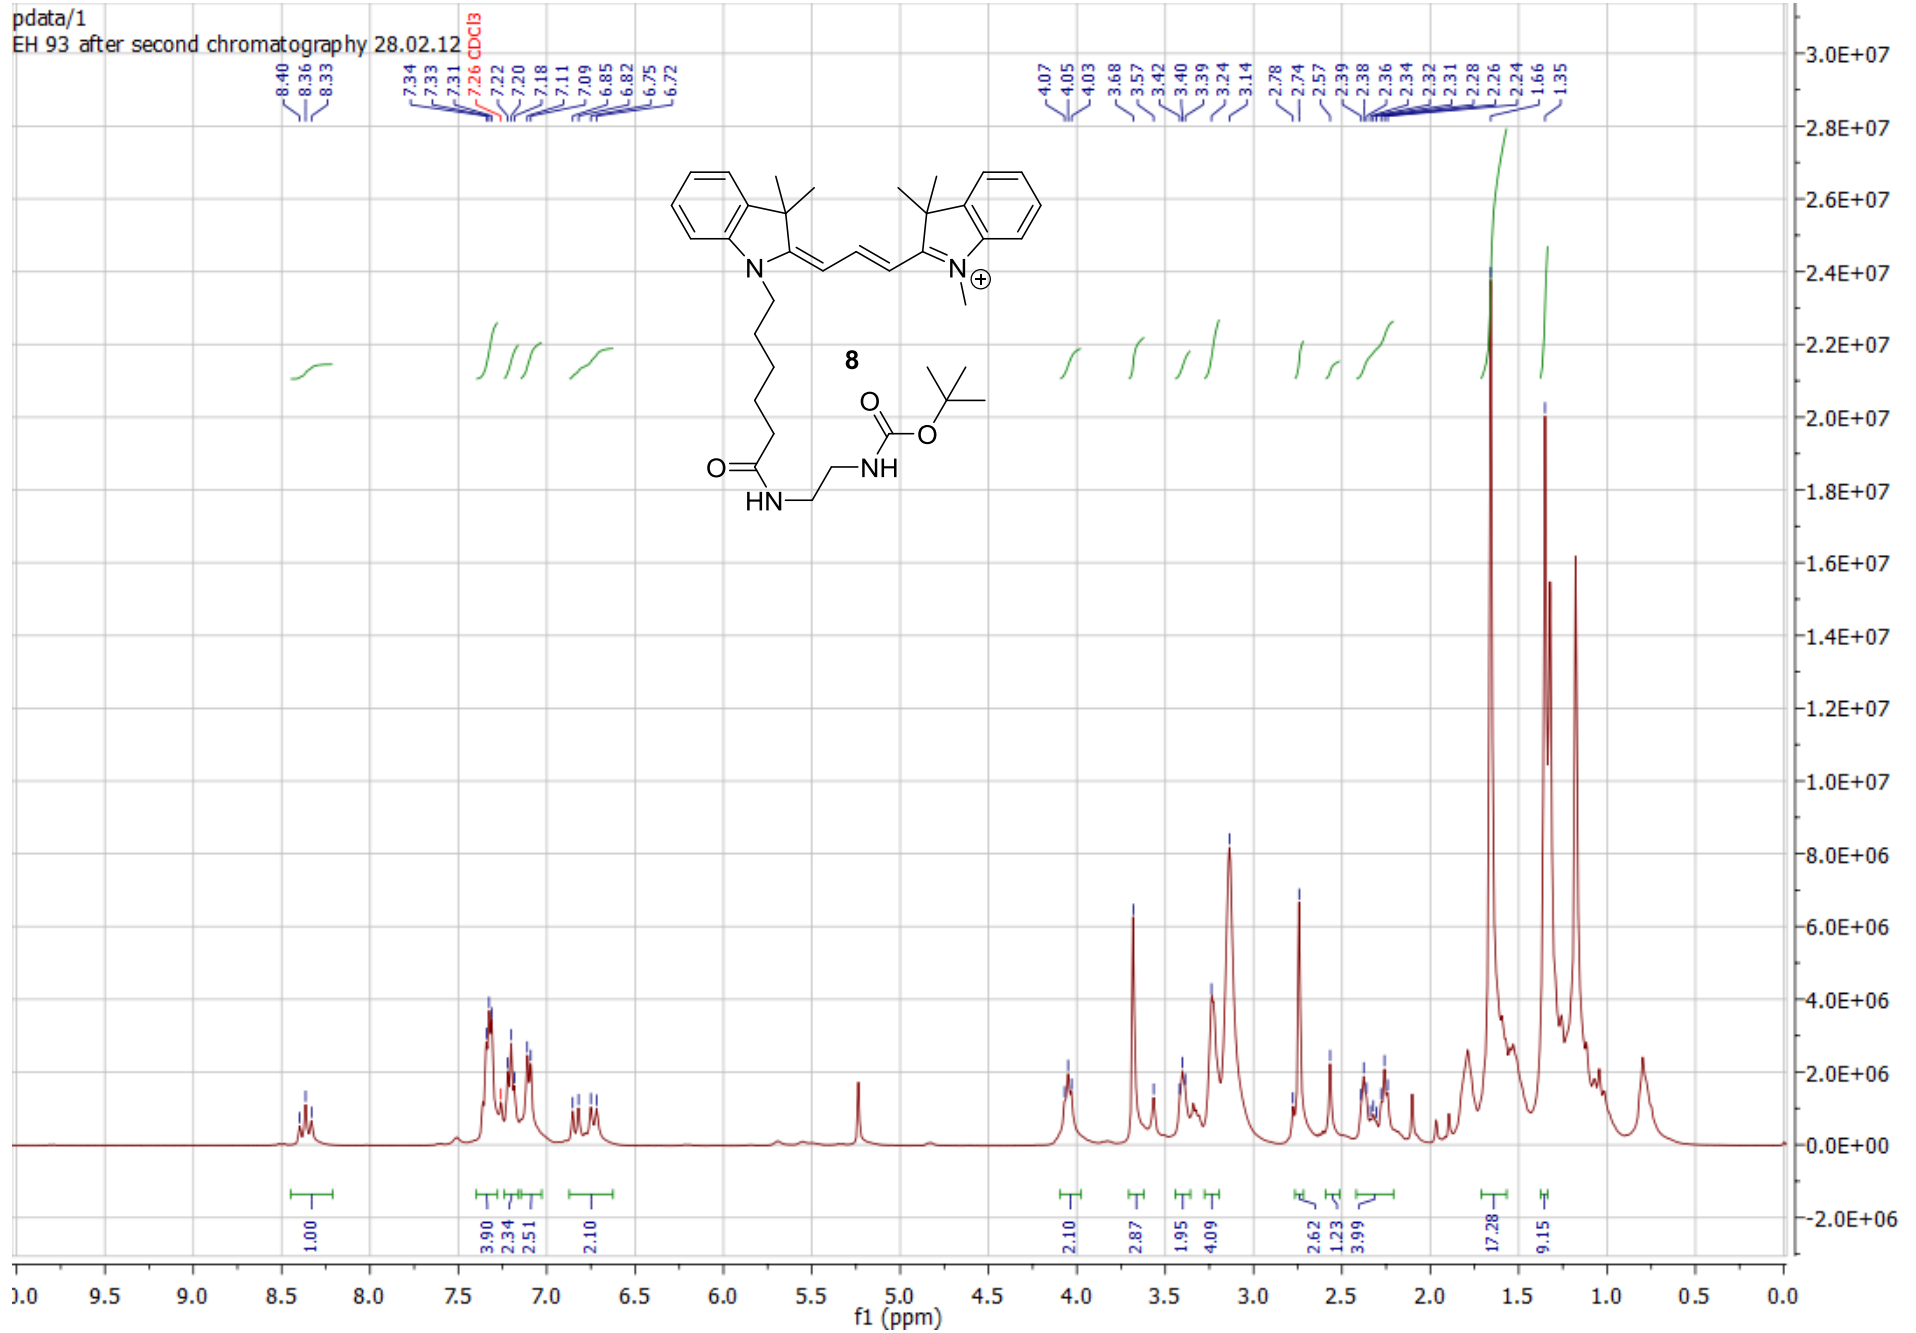

Compound **8** - MS (ESI+):  $m/z$  calc. for  $C_{37}H_{51}N_4O_3^+$ : 599.40; found: 599.6  $[M]^+$

13 in MeOH

Shabat\_Ehud\_EH-1-98 12 (0.199) Cm (10:16)

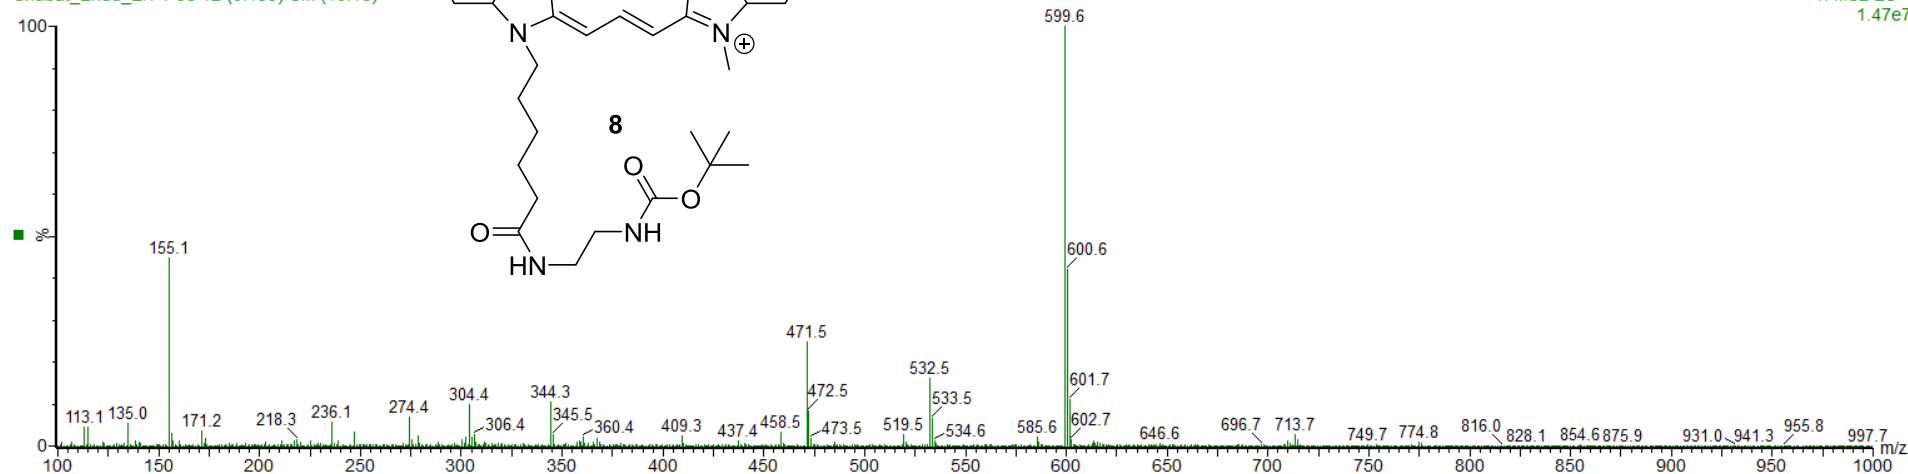

Ehud

17-Jul-2013

Coll energy 3

1: MS2 ES+  
1.47e7

Compound **9** - MS (ESI+):  $m/z$  calc. for  $C_{59}H_{70}N_5O_4^+$ : 944.51; found: 944.8  $[M]^+$

Shabat\_Ehud\_EH-1-95 13 (0.217) Cm (8:26)

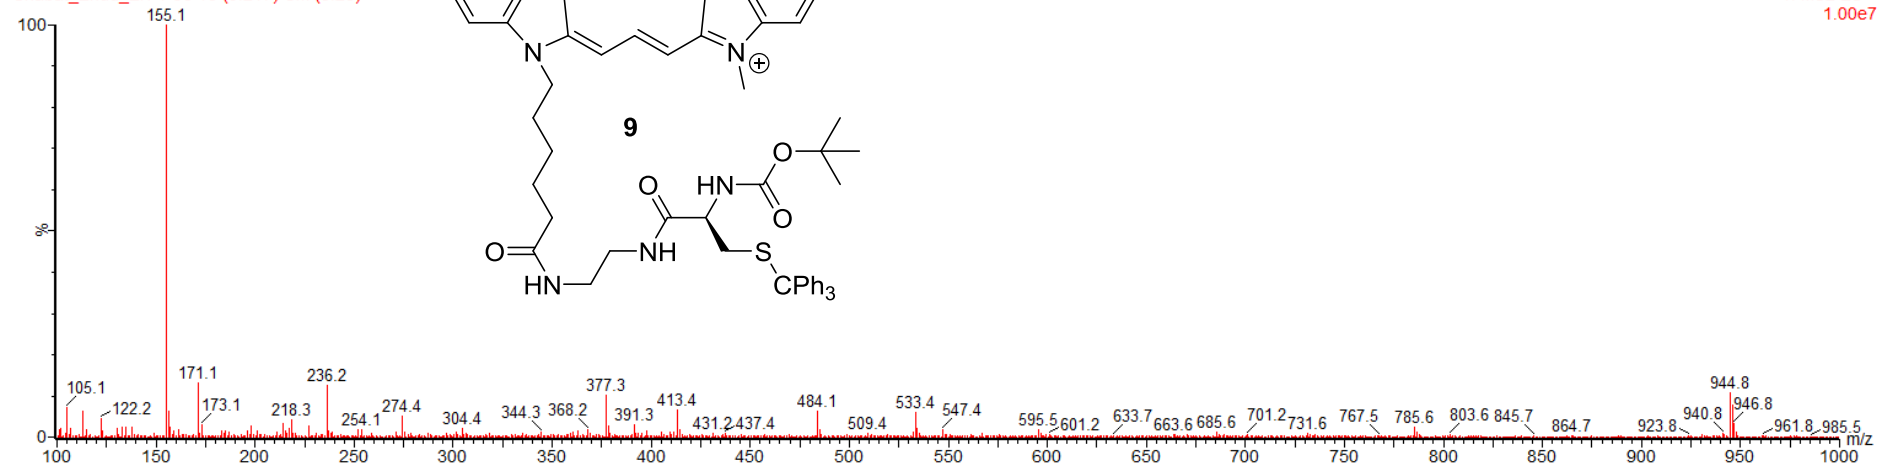

1: MS2 ES+  
1.00e7

Compound **1** -  $^1\text{H}$  NMR spectrum in  $\text{CDCl}_3$

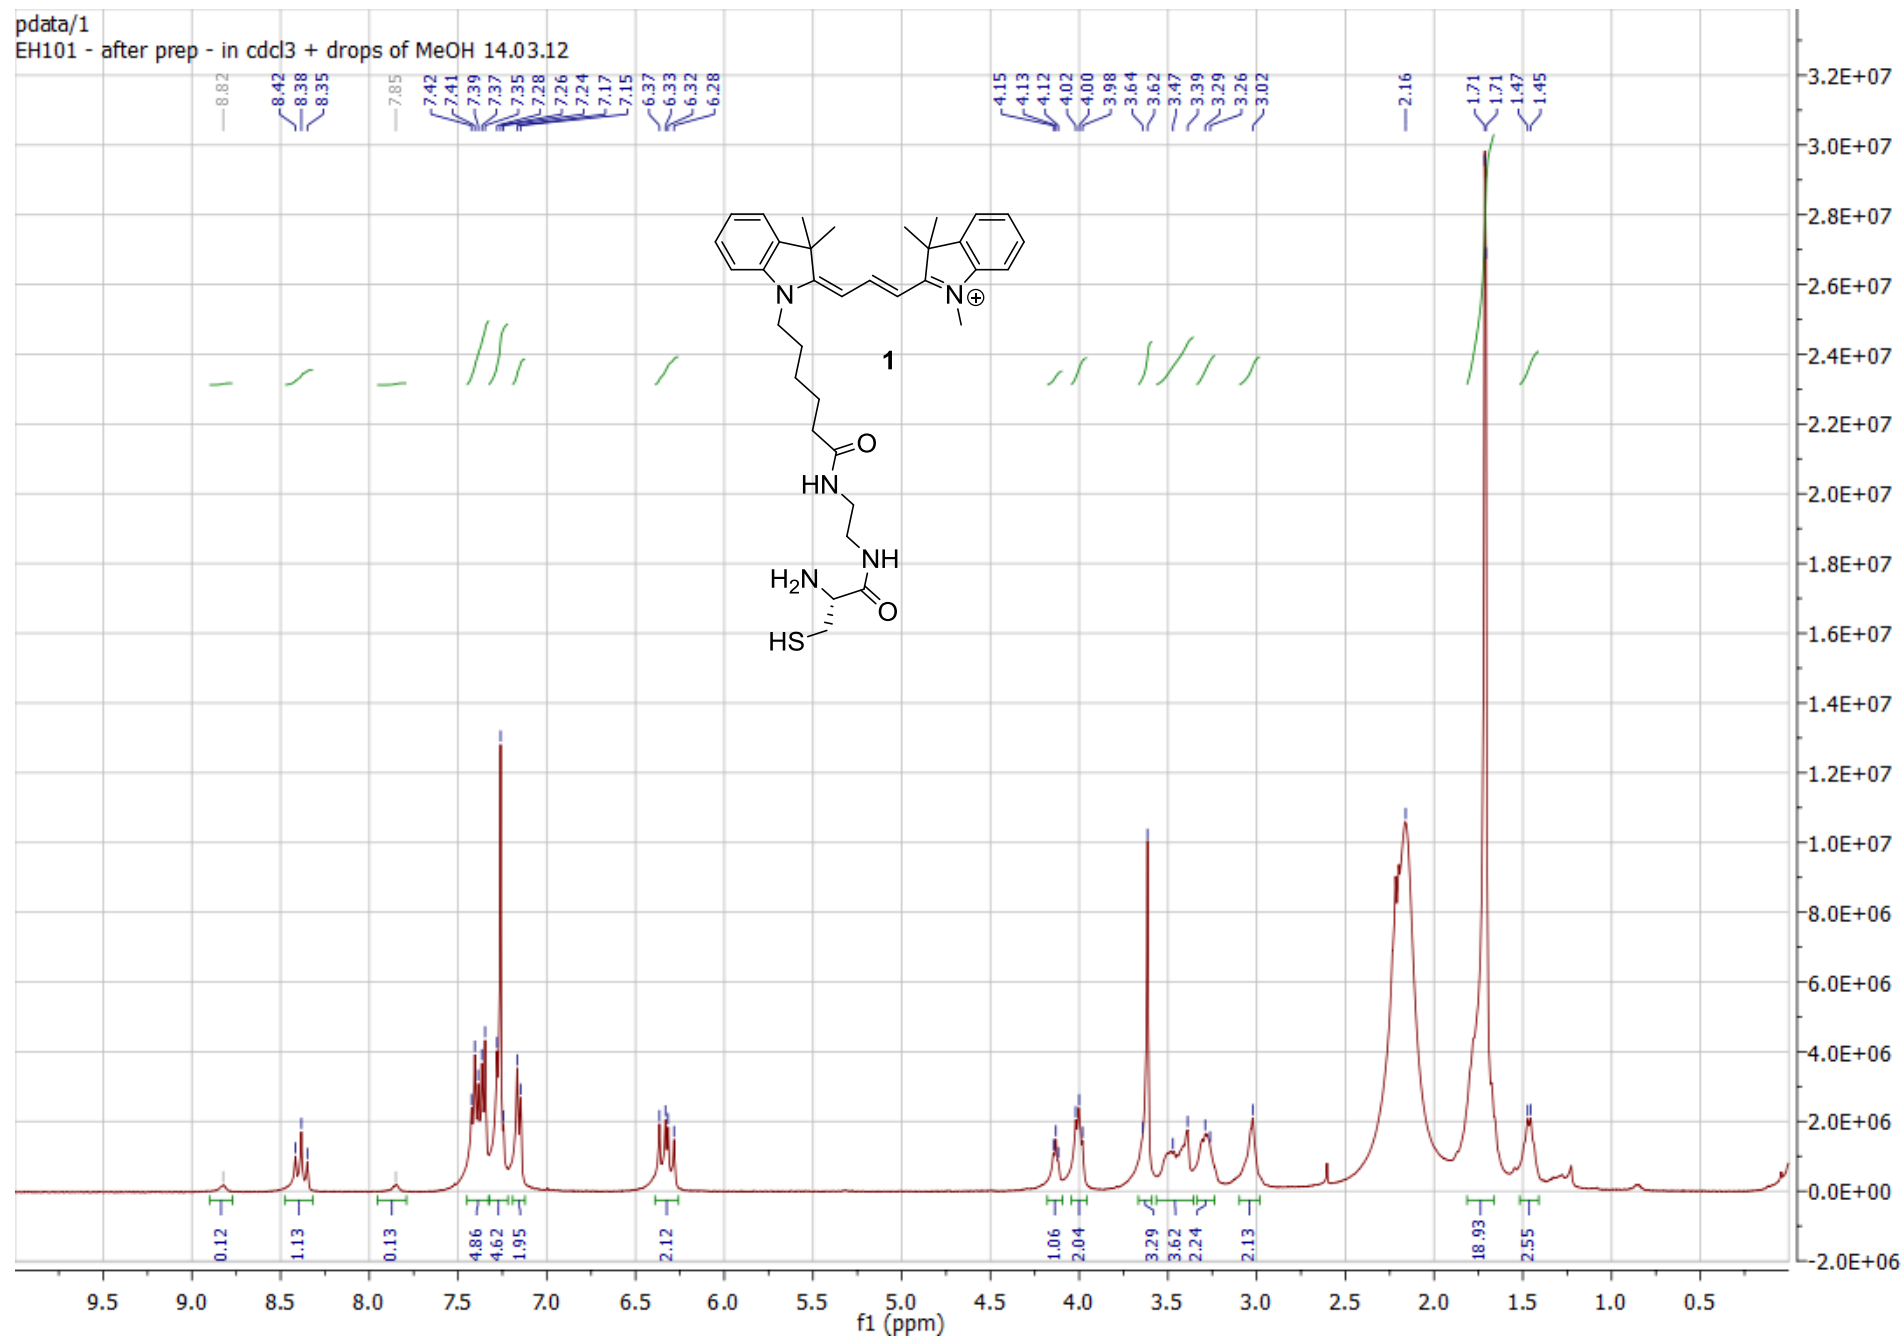

Compound **1** - MS (ESI+):  $m/z$  calc. for  $C_{70}H_{94}N_{10}O_4S_2^{2+}$ : 601.35; found: 601.3  $[M]^+$ .

EH - 101

shabat175 199 (8.750) Cm (161:216-28:112)

Ehud Herbust

1: TOF MS ES+  
1.10e6

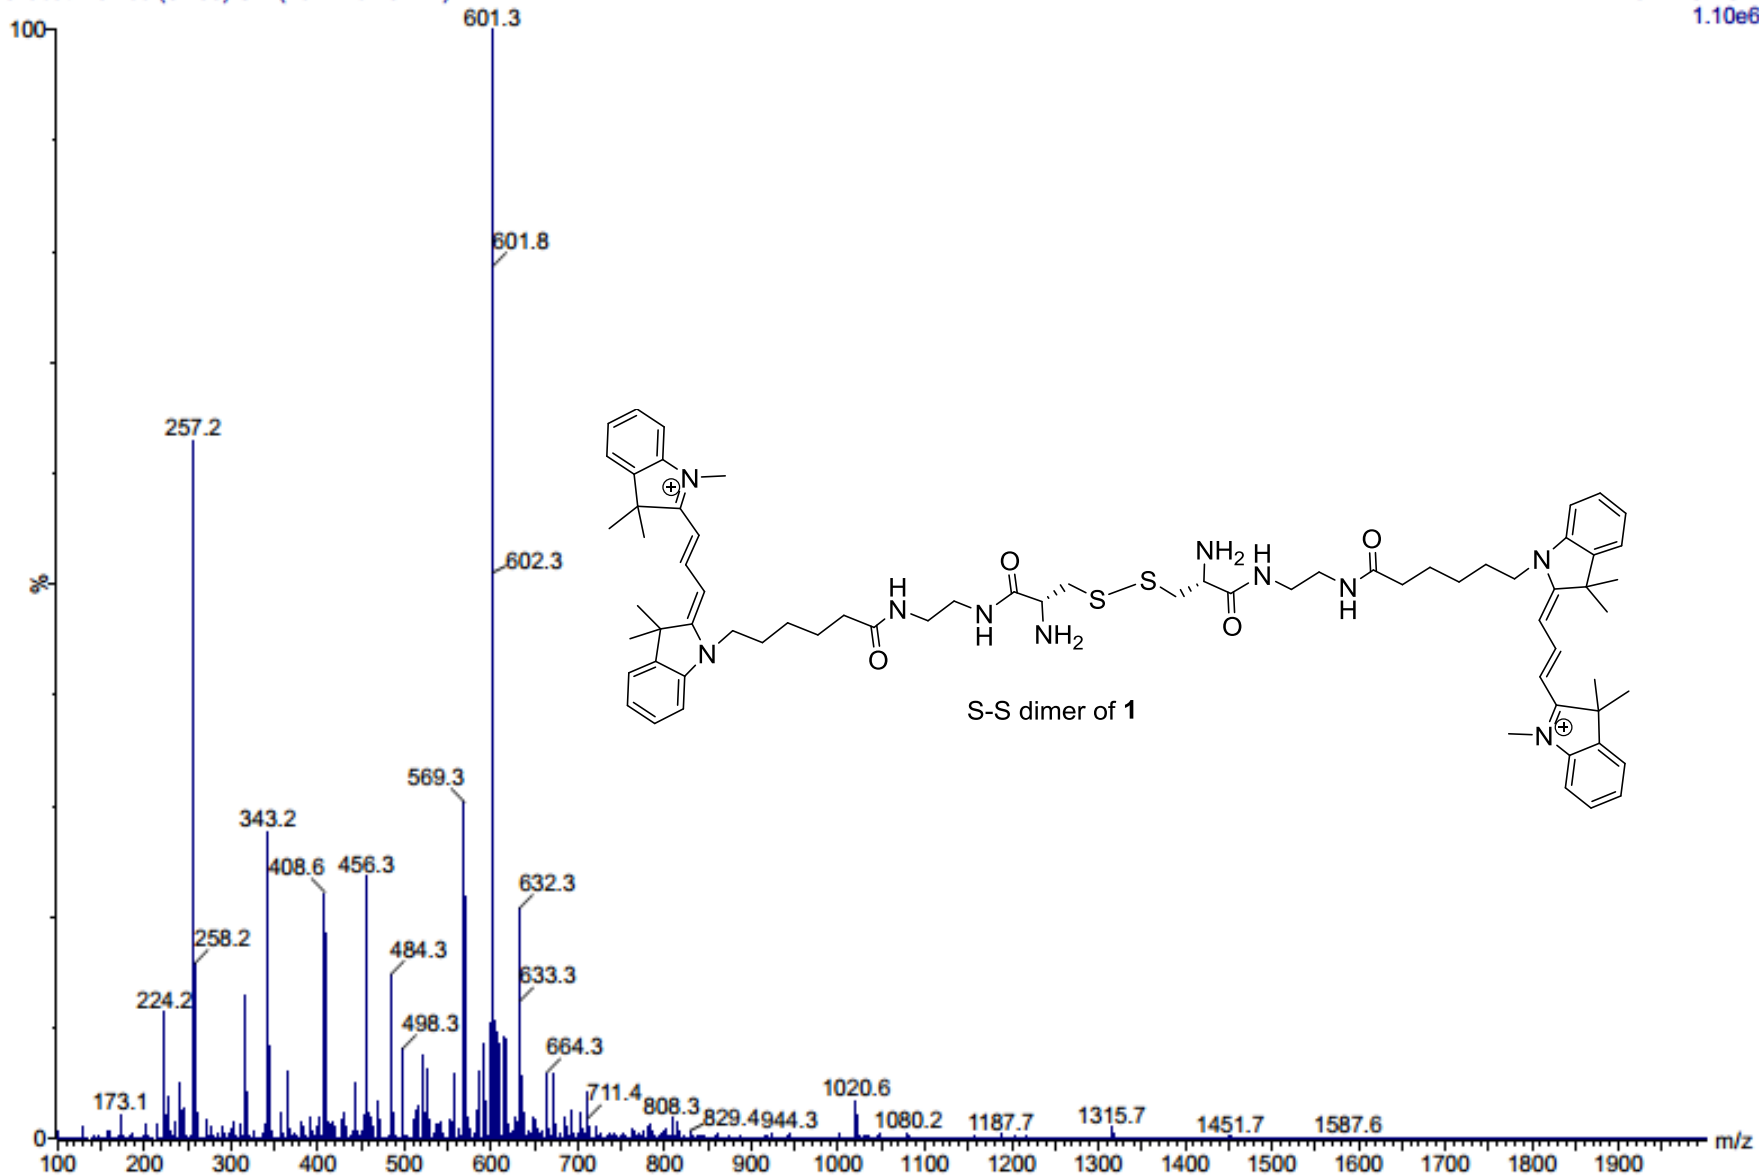



Compound **2b** -  $^1\text{H}$  NMR spectrum in  $\text{CDCl}_3$

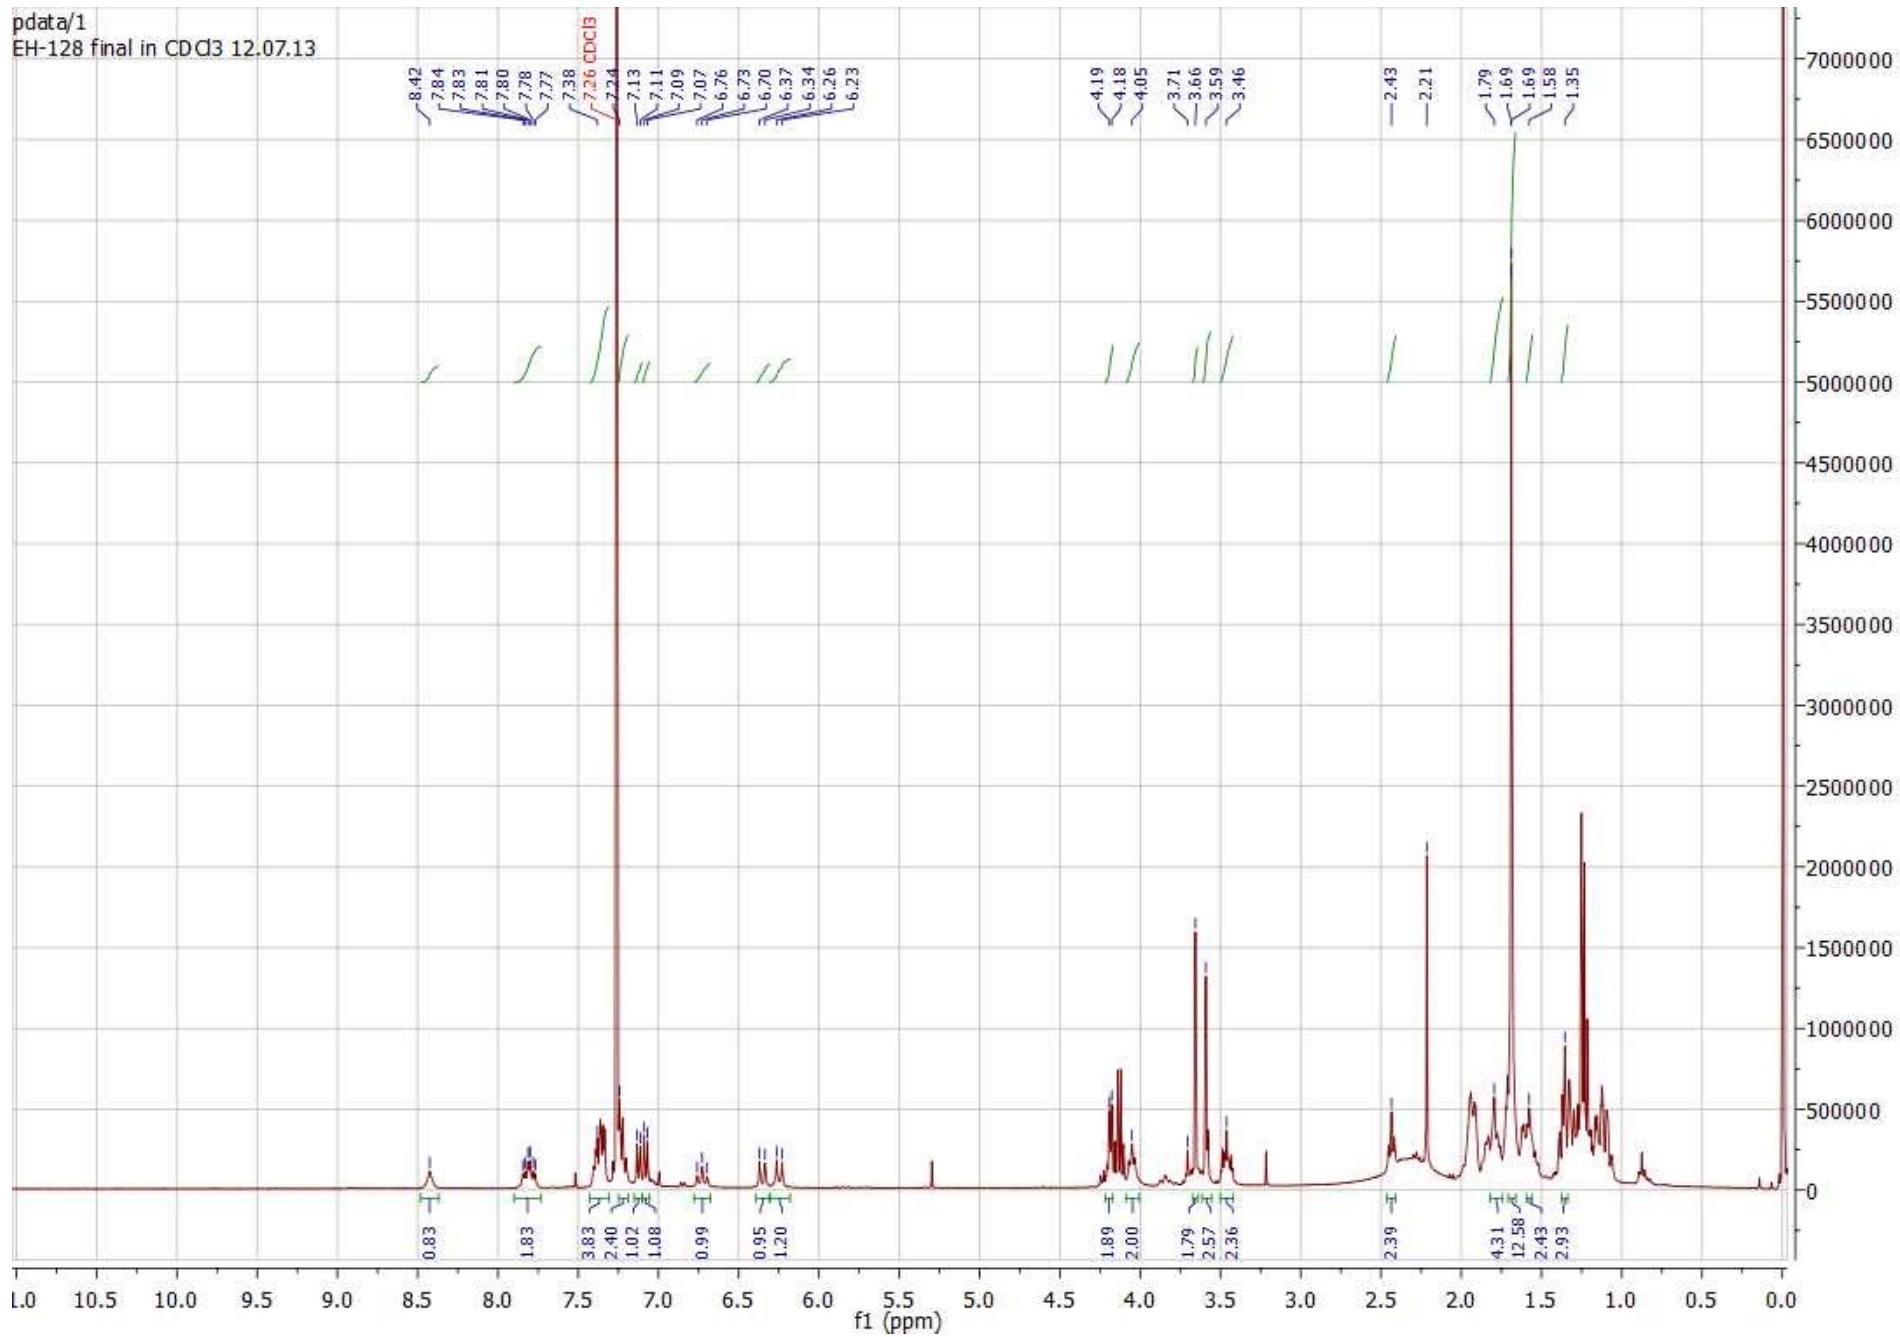

Compound **2b** - MS (ESI+):  $m/z$  calc. for  $C_{38}H_{48}N_3O_4S^+$ : 642.34; found: 642.5  $[M]^+$ .

EH-1-128 MeOH ACN

Ehud

17-Jul-2013  
Coll energy 3

Shabat\_Ehud\_EH-1-128 13 (0.216) Cm (13:14-(6:8+21:22))

1: MS2 ES+  
1.03e7

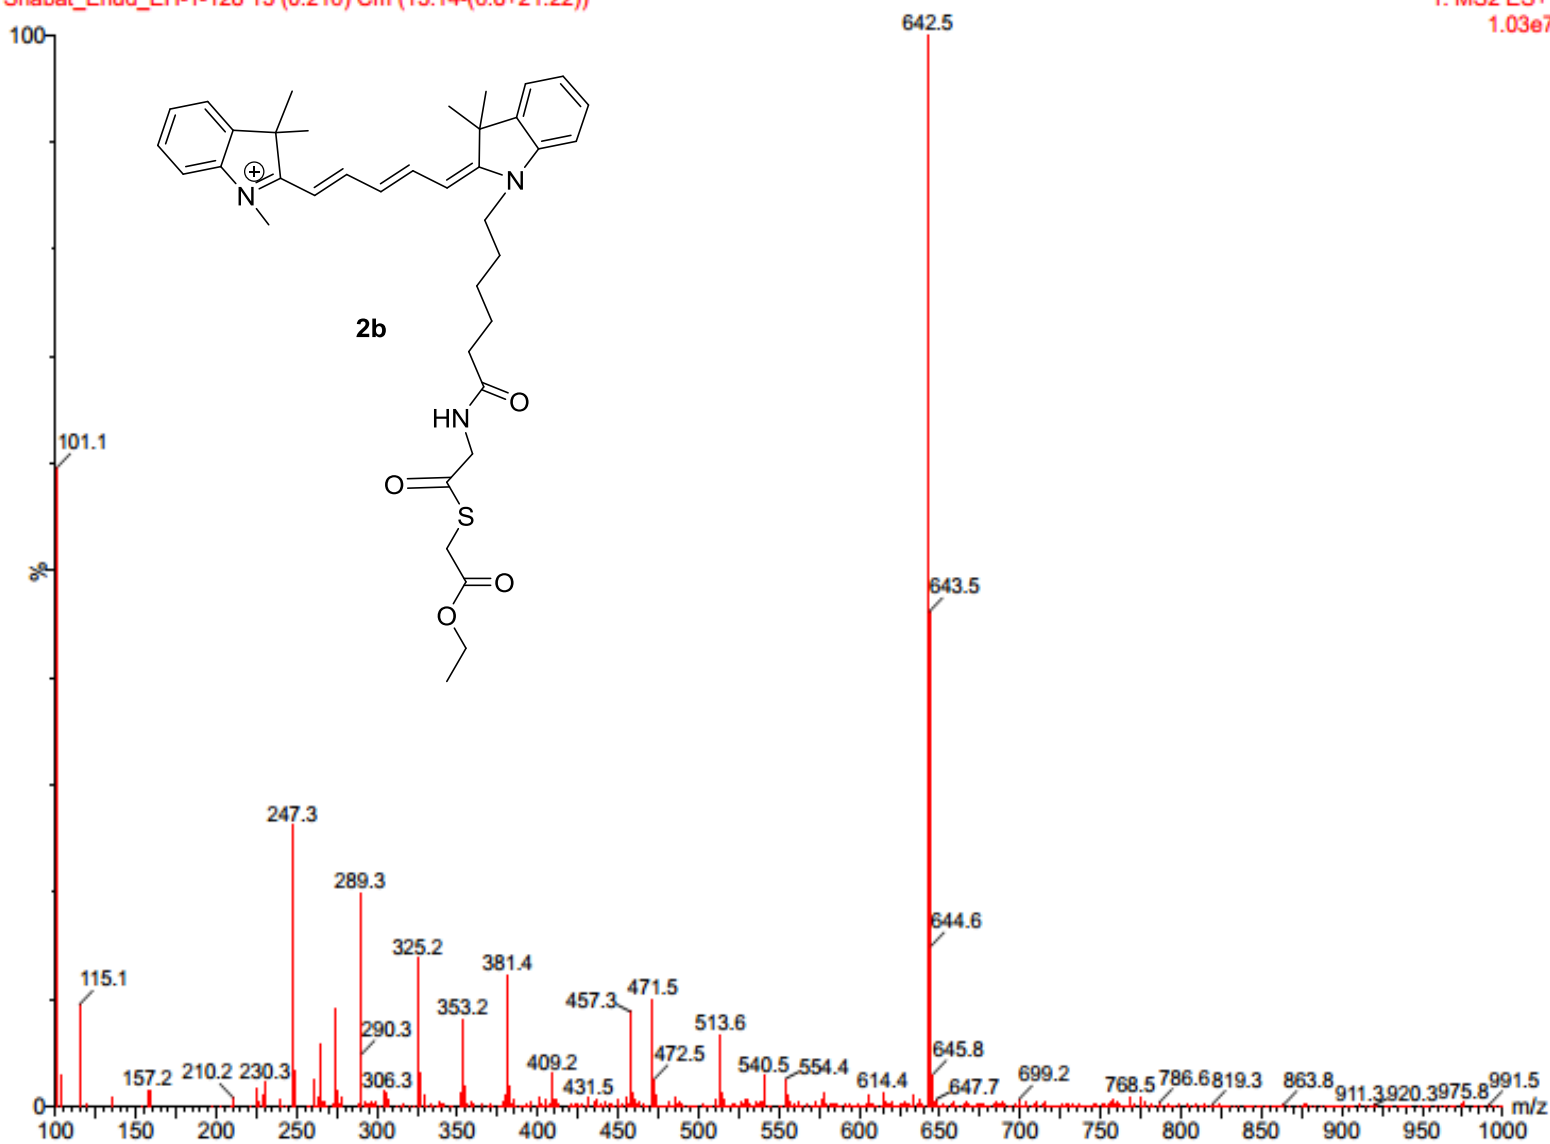

Compound **2c** -  $^1\text{H}$  NMR spectrum in  $\text{CDCl}_3$

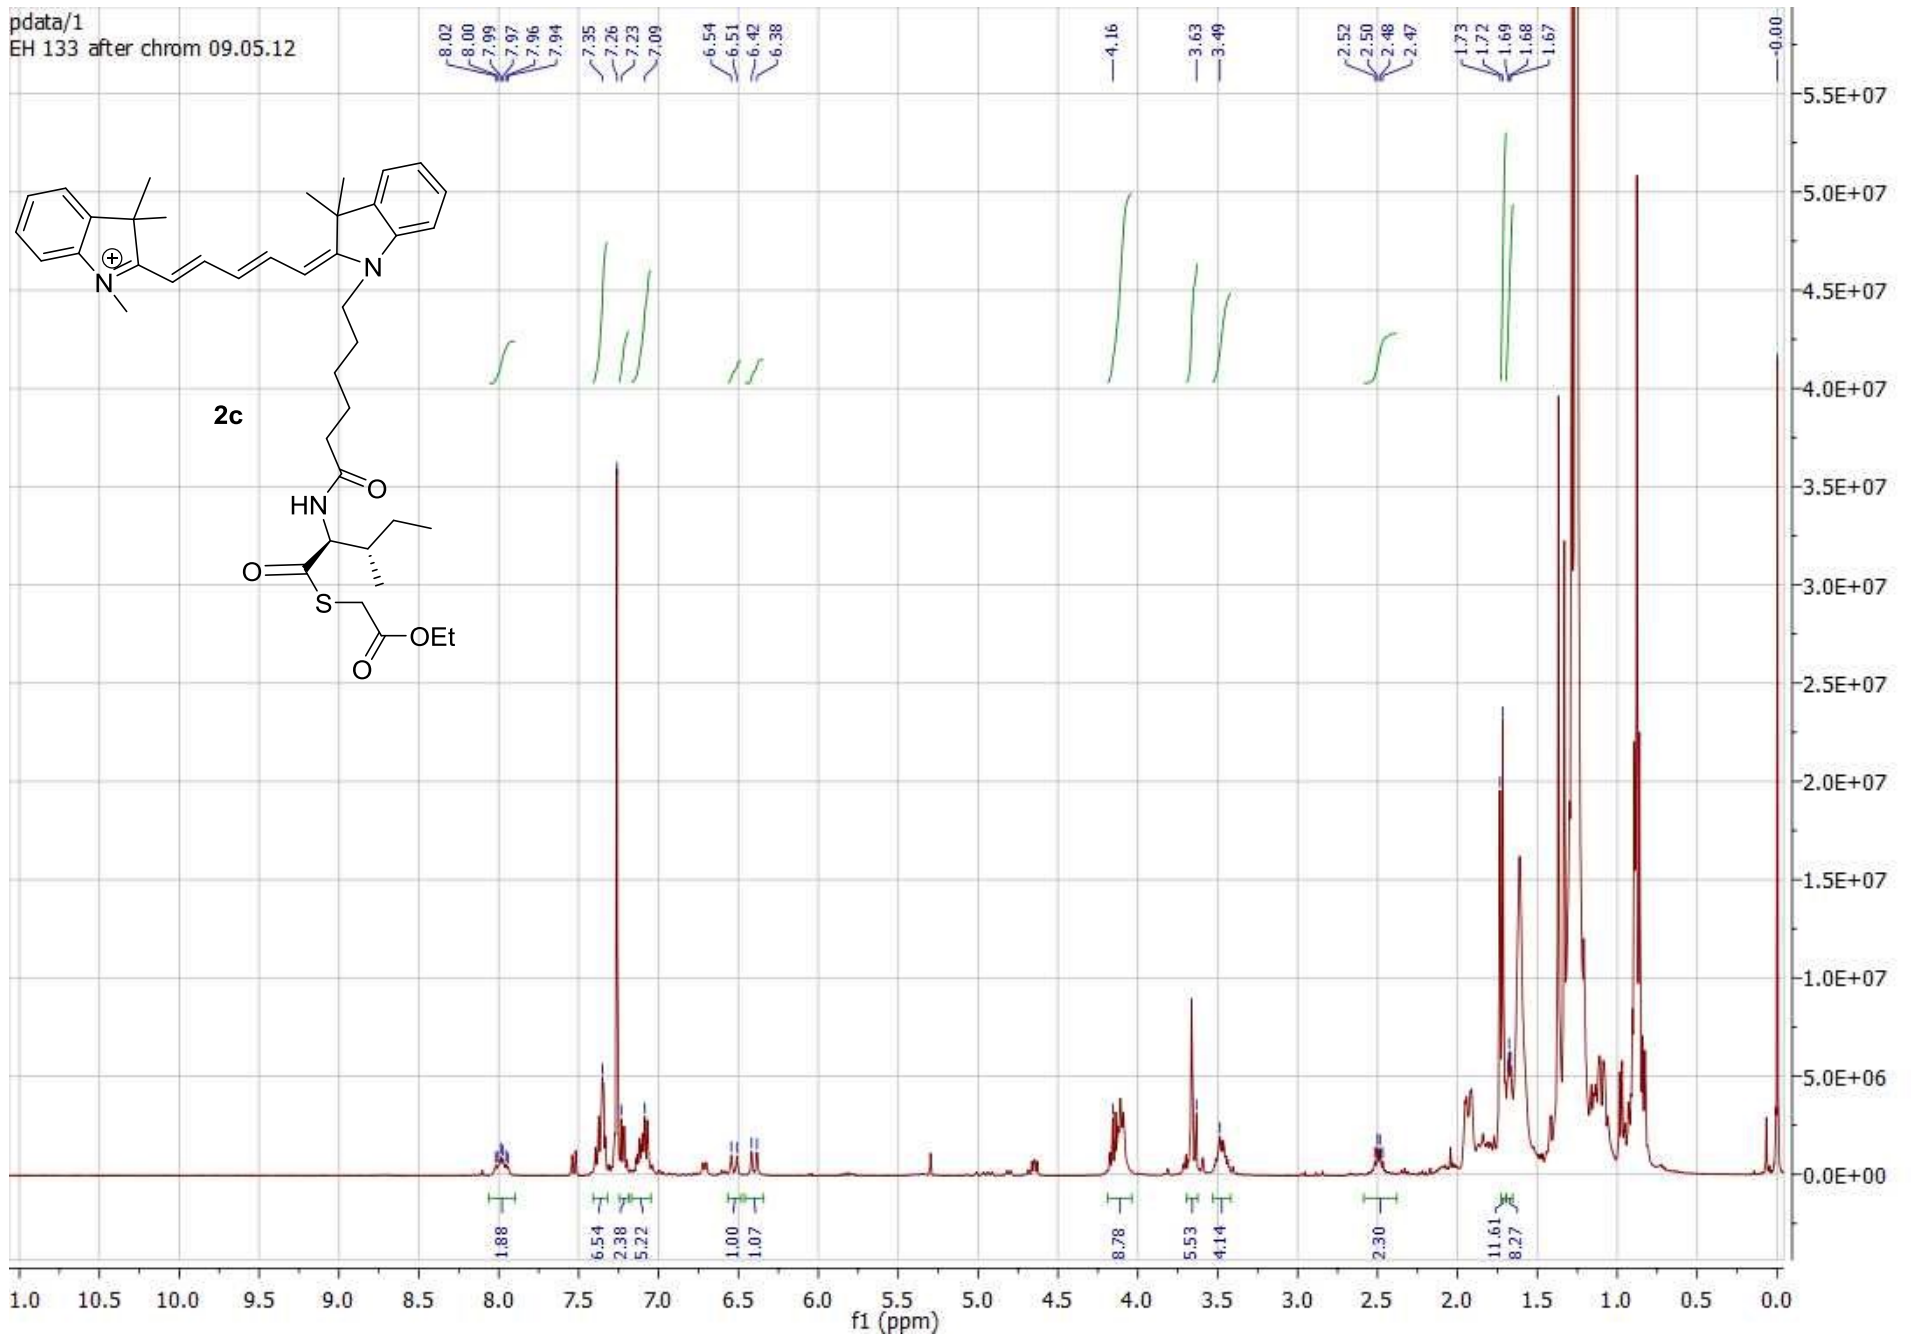

Compound **2c** - MS (ESI+):  $m/z$  calc. for  $C_{42}H_{56}N_3O_4^+$ : 698.40; found: 698.6 [M]<sup>+</sup>.

EH-1-133 from DMSO stock dil MeOH

Ehud

17-Jul-2013  
Coll energy 3

1: MS2 ES+  
5.07e7

Shabat\_Ehud\_EH-1-133 13 (0.216) Cm (10:19)

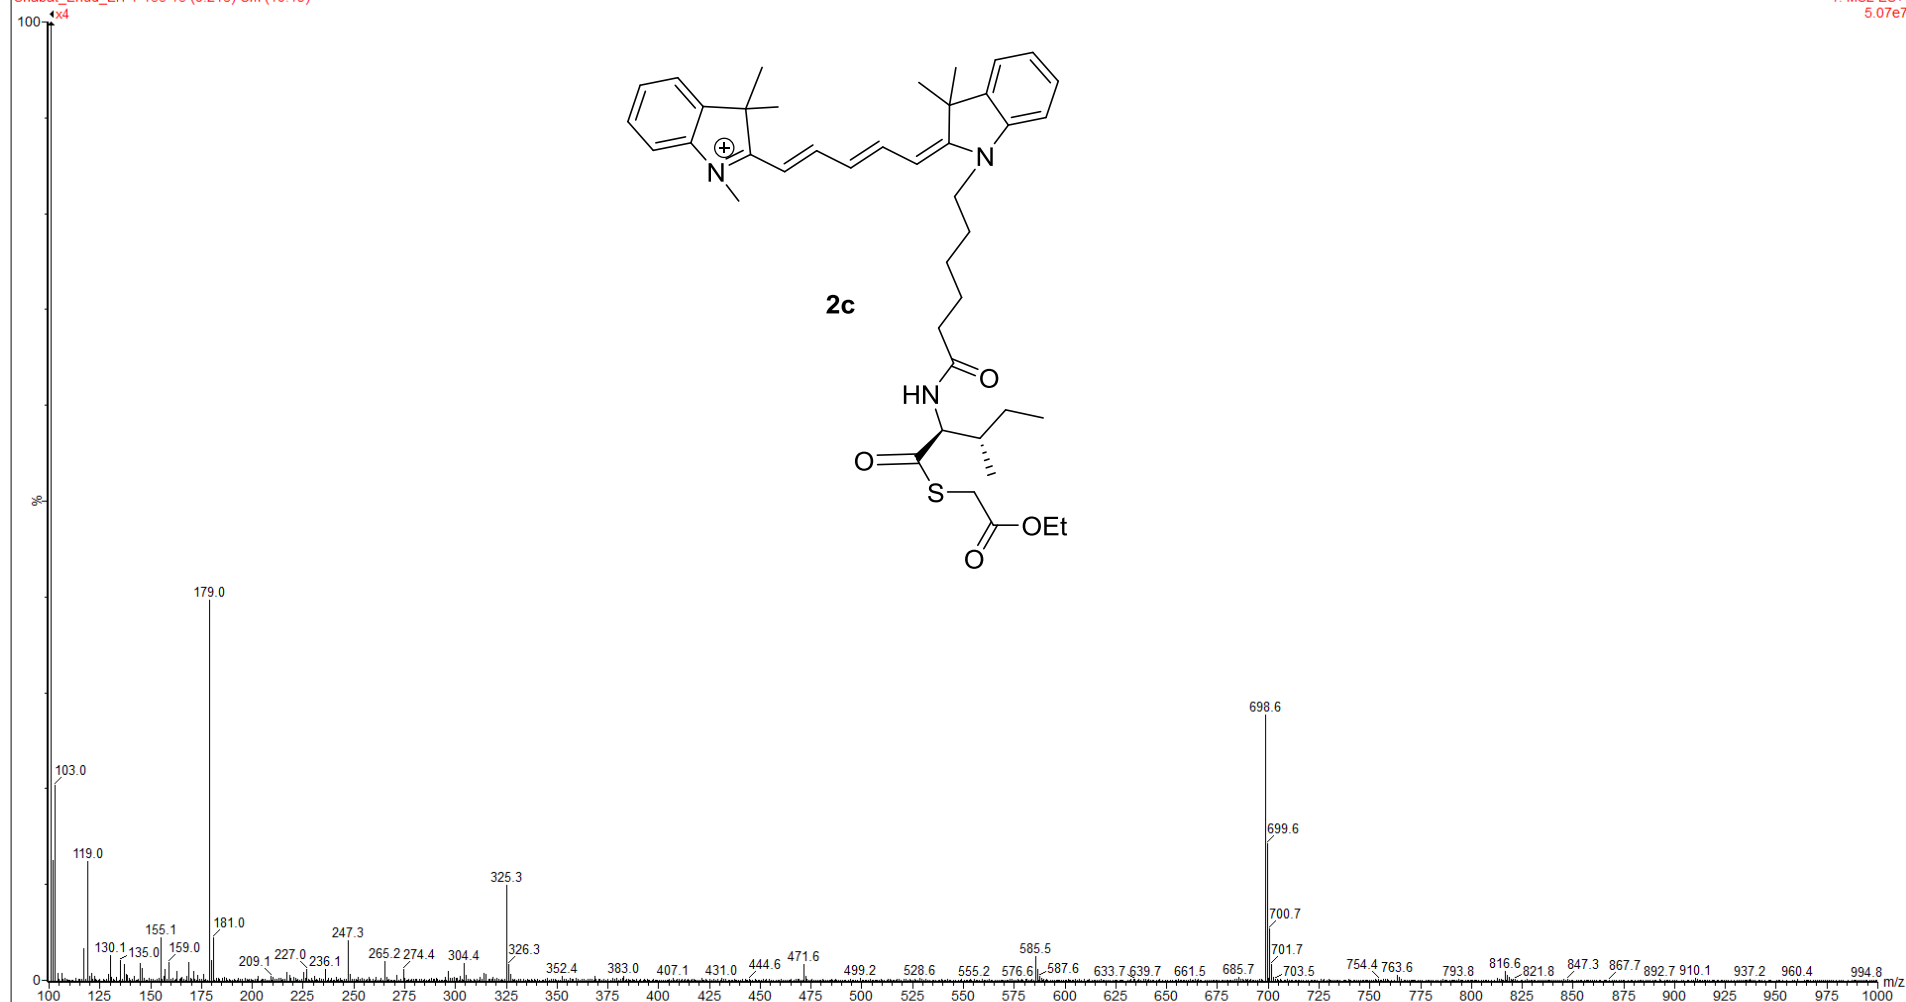

Compound **21** -  $^1\text{H}$  NMR spectrum in  $\text{CDCl}_3$

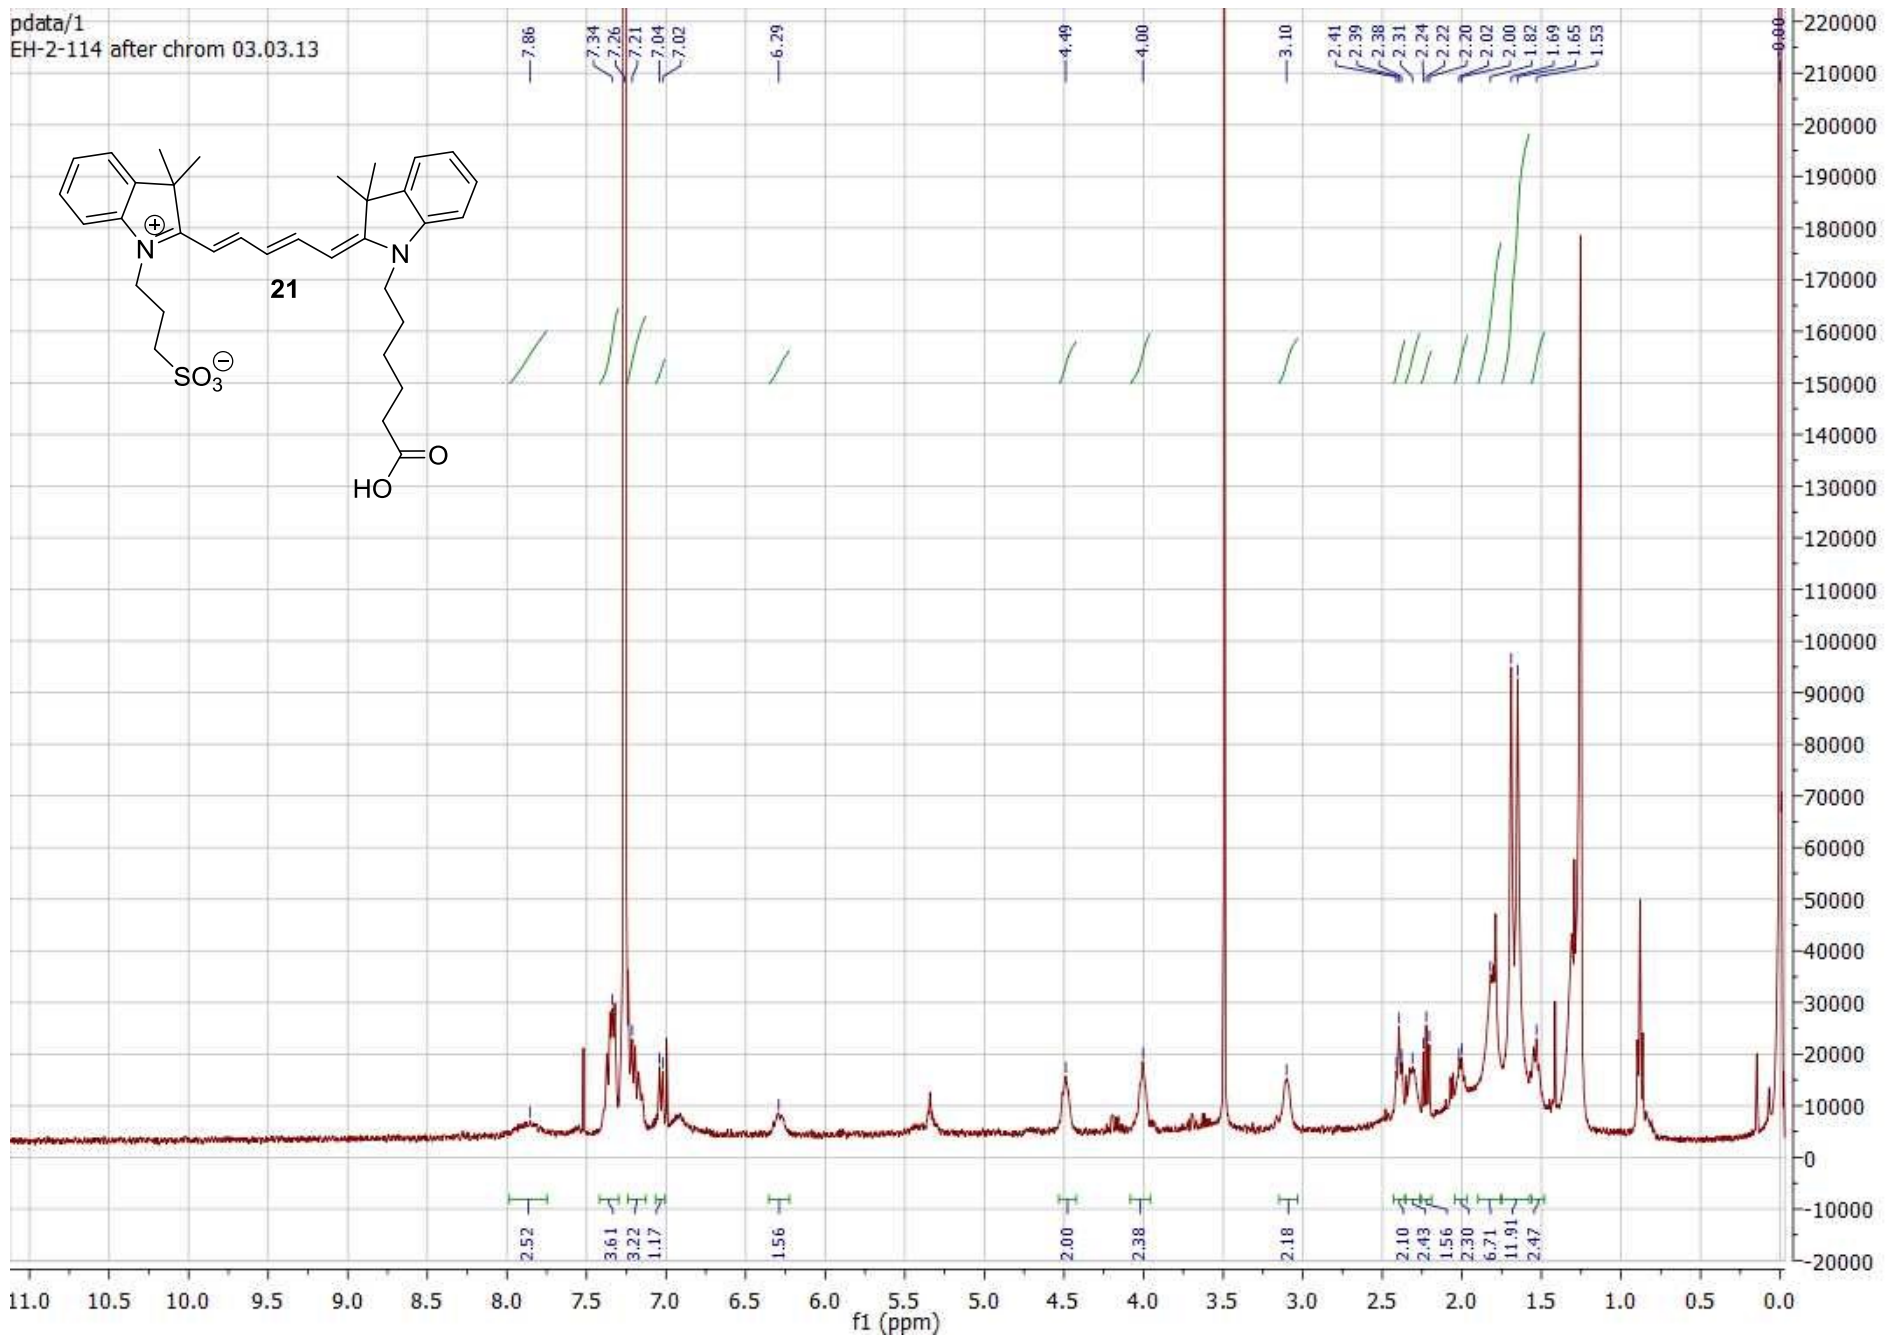

Compound **22** -  $^1\text{H}$  NMR spectrum in  $\text{DMSO-d}_6$

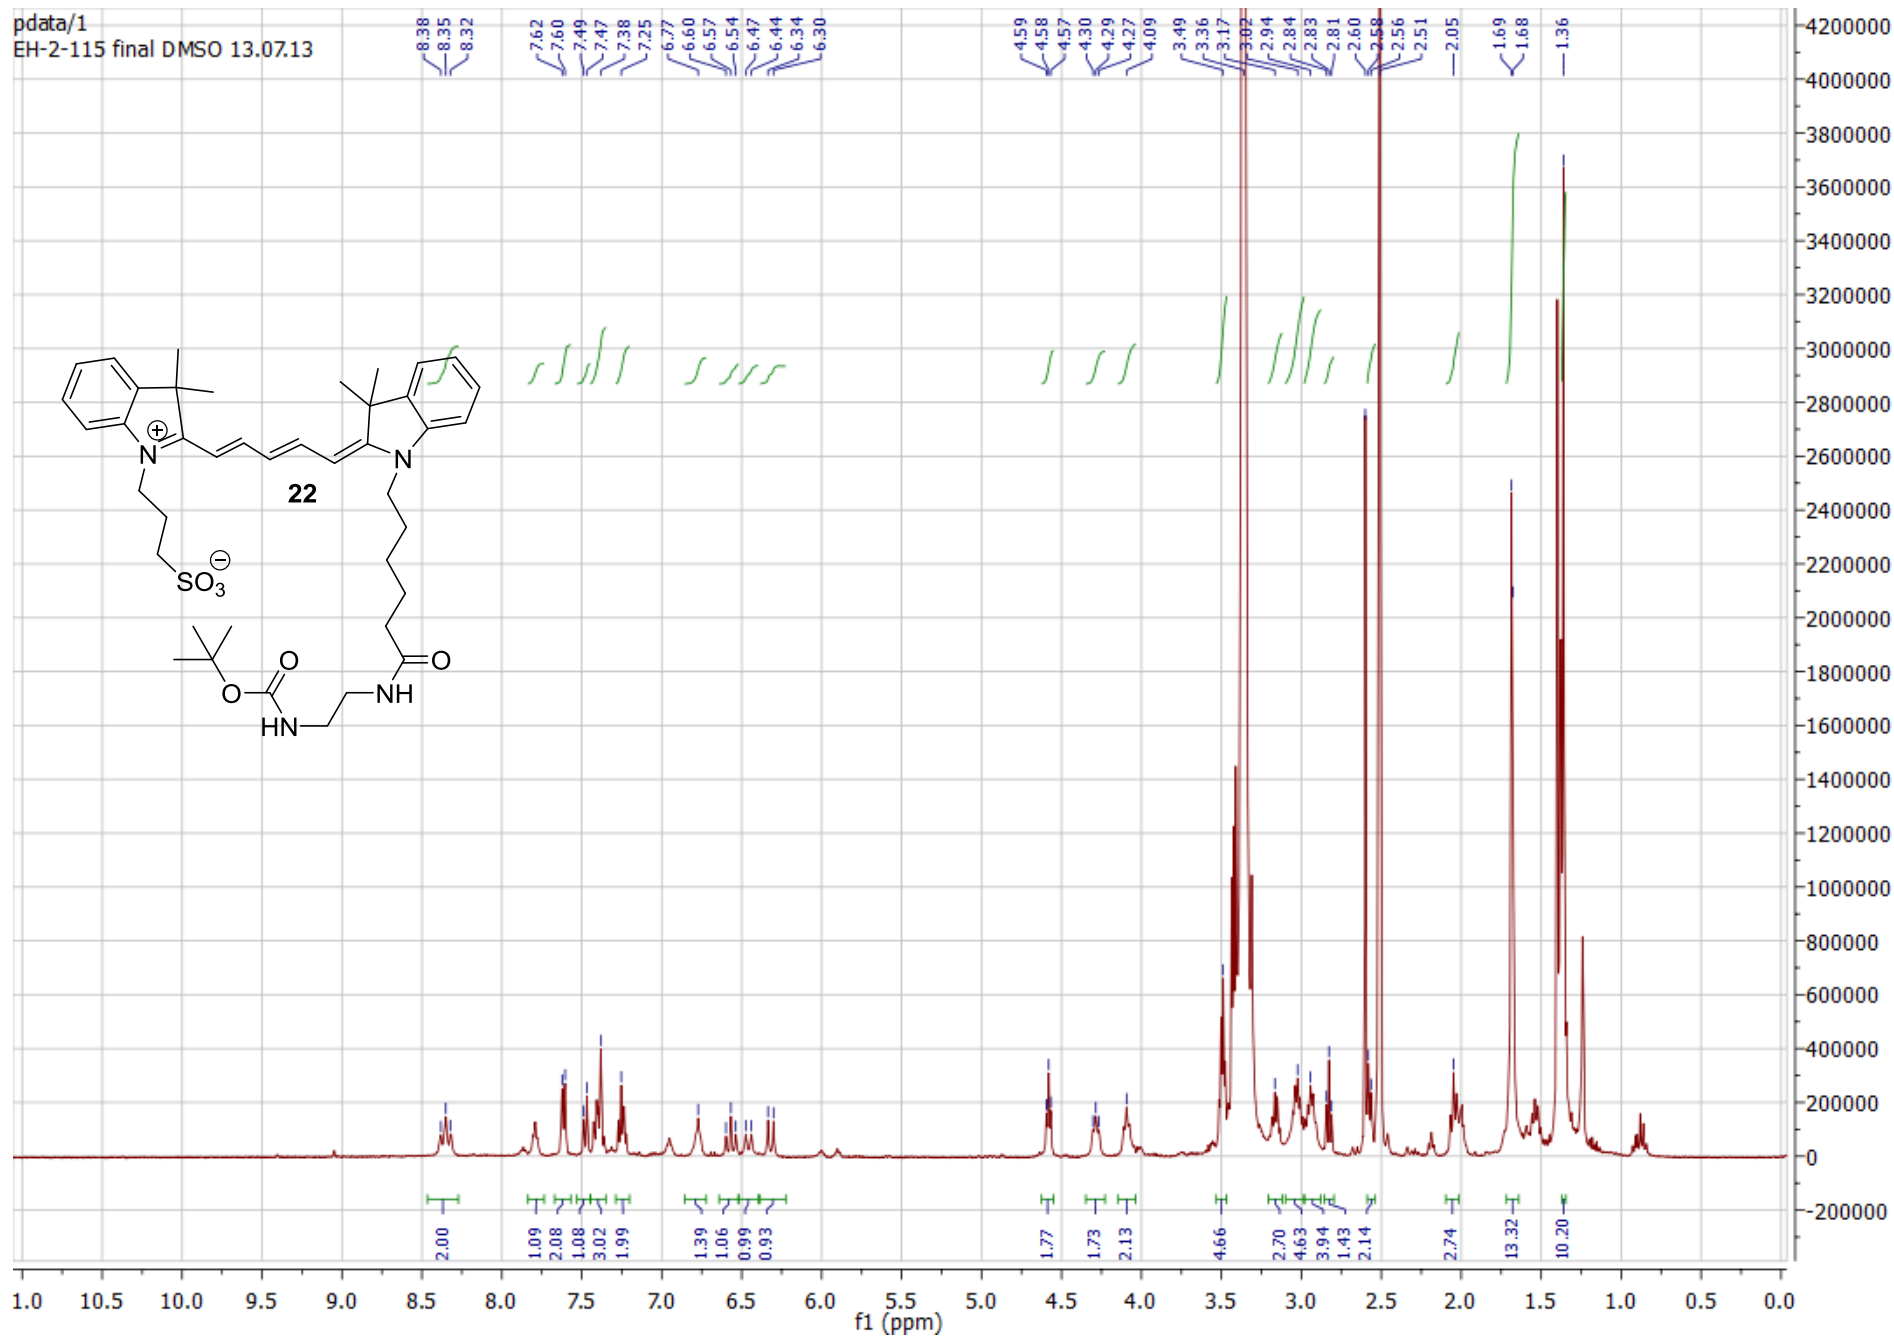

Compound **21** - MS (ESI+):  $m/z$  calc. for  $C_{34}H_{42}N_2Na.O_5S^+$ : 613.27; found: 613.5  $[M + Na]^+$ .

Shabat\_Ehud\_EH-2-114 14 (0.234) Cm (10:17)

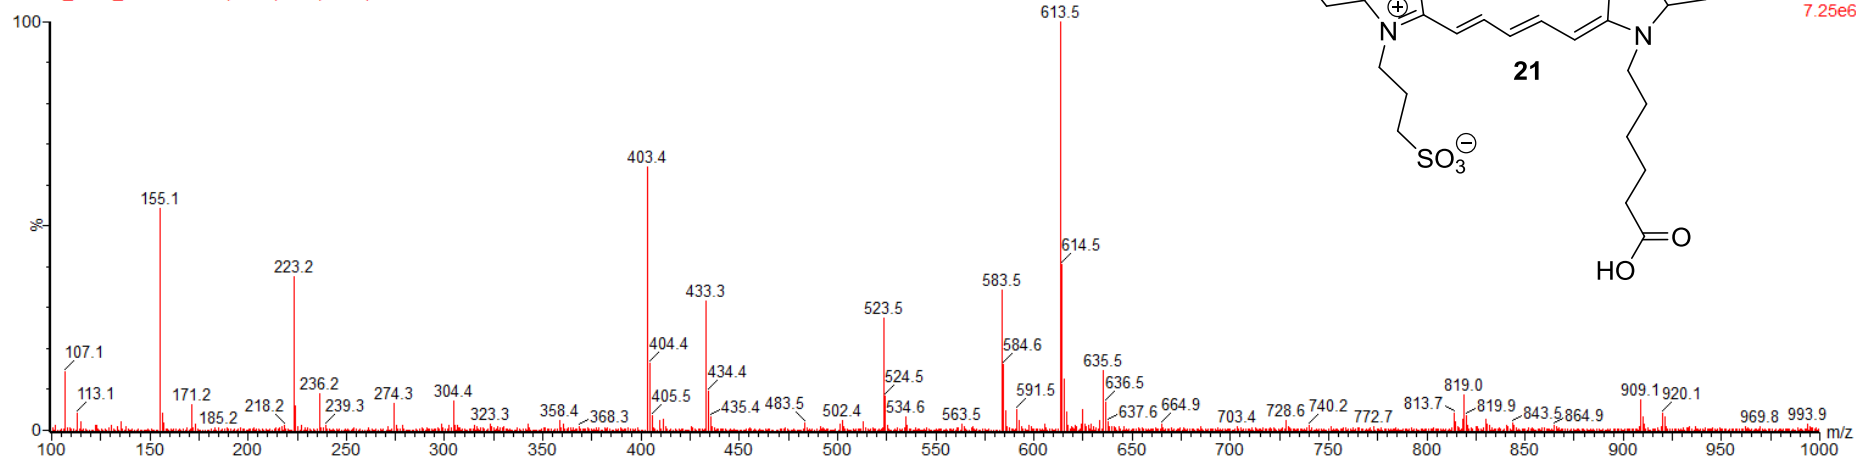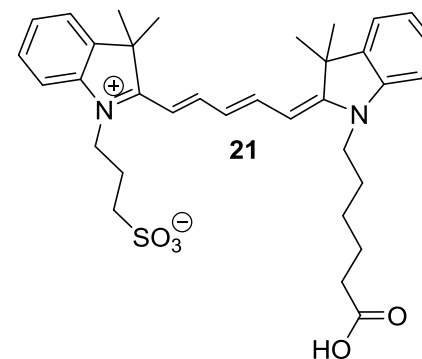

1: MS2 ES+  
7.25e6

Compound **22** - MS (ESI+):  $m/z$  calc. for  $C_{41}H_{56}N_4Na.O_6S^+$ : 755.38; found: 755.6  $[M + Na]^+$ .

Shabat\_Ehud\_EH-2-115 15 (0.251) Cm (10:21)

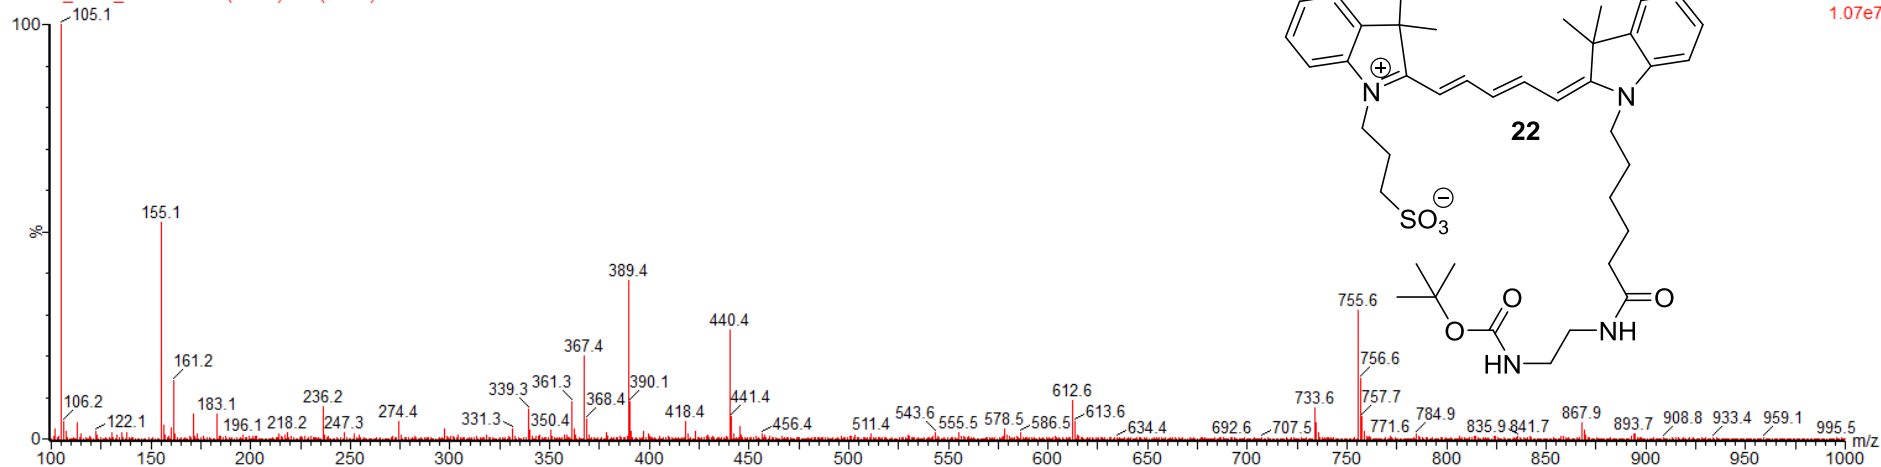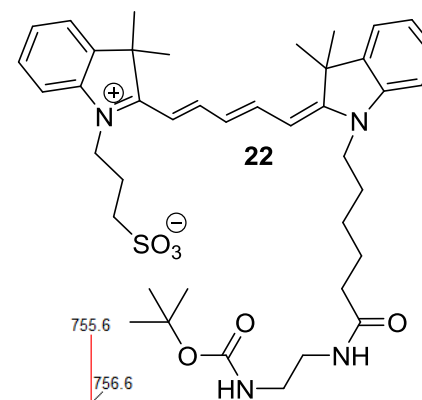

1: MS2 ES+  
1.07e7

Compound **23** -  $^1\text{H}$  NMR spectrum in  $\text{DMSO-d}_6$

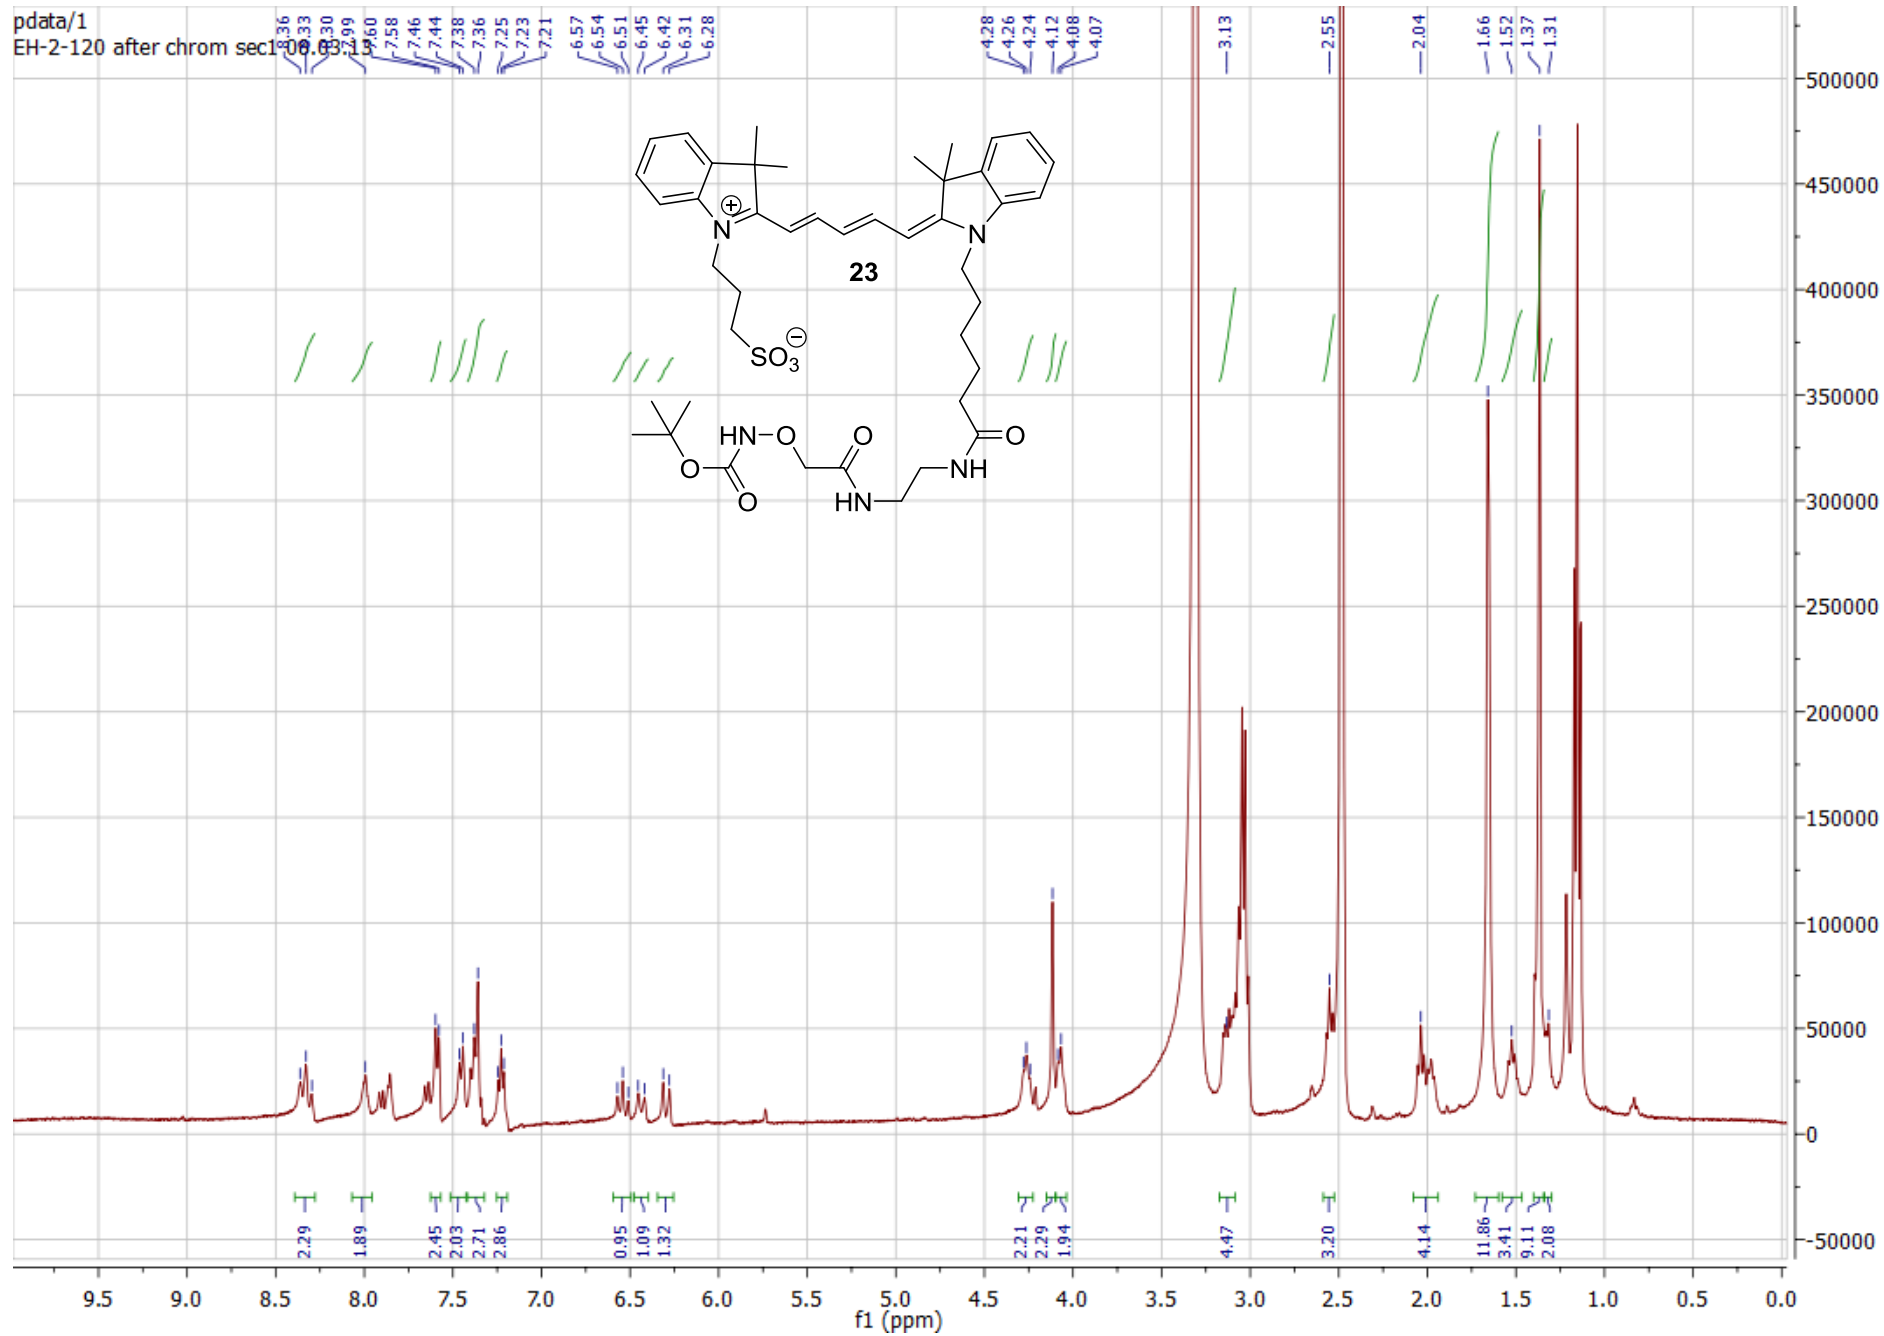



Compound **23** - MS (ESI+):  $m/z$  calc. for  $C_{43}H_{59}N_5NaO_8S^+$ : 828.40; found: 828.7 [M + Na]<sup>+</sup>.

Shabat\_Ehud\_EH-2-120 13 (0.217)

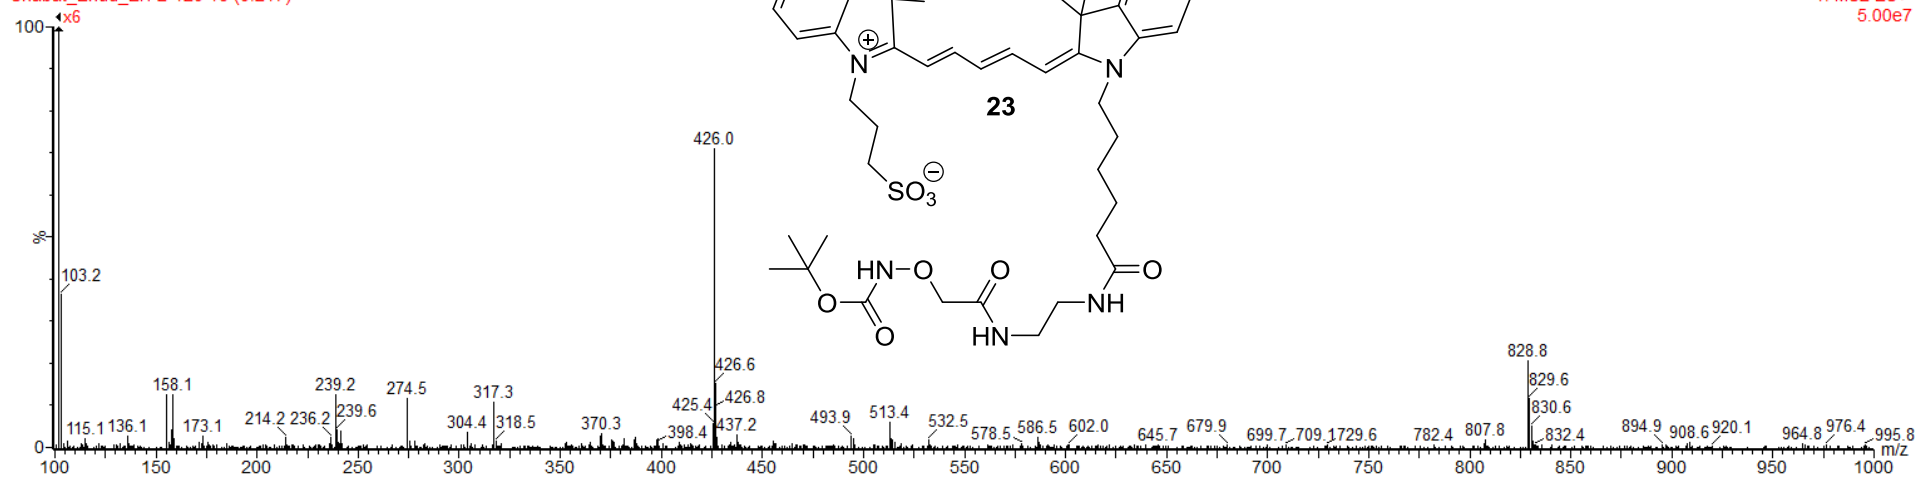

1: MS2 ES+  
5.00e7

Compound **24** -  $^1\text{H}$  NMR spectrum in  $\text{DMSO-d}_6$

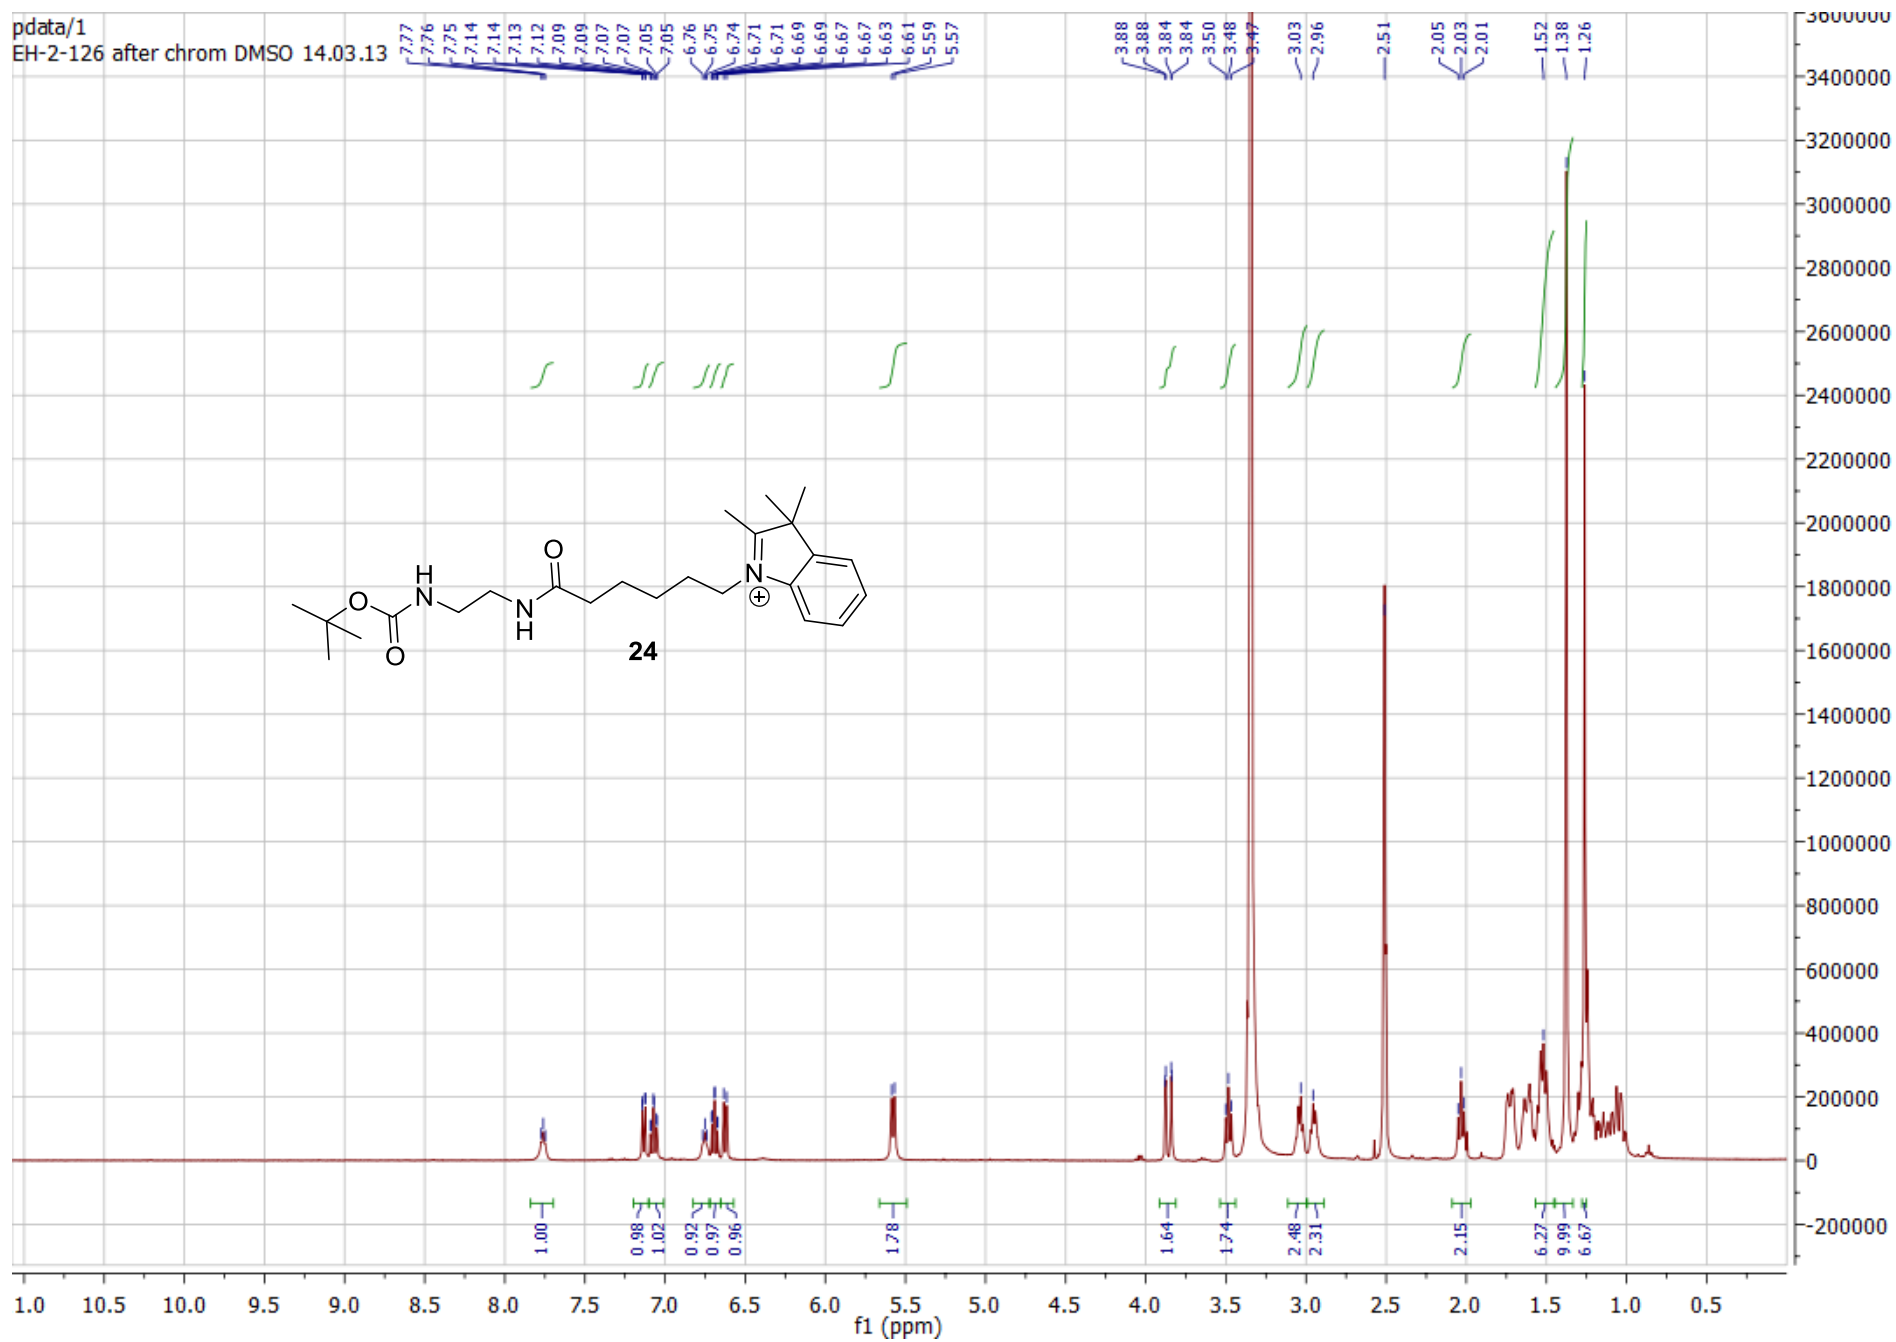

Compound **26** -  $^1\text{H}$  NMR spectrum in  $\text{DMSO-d}_6$

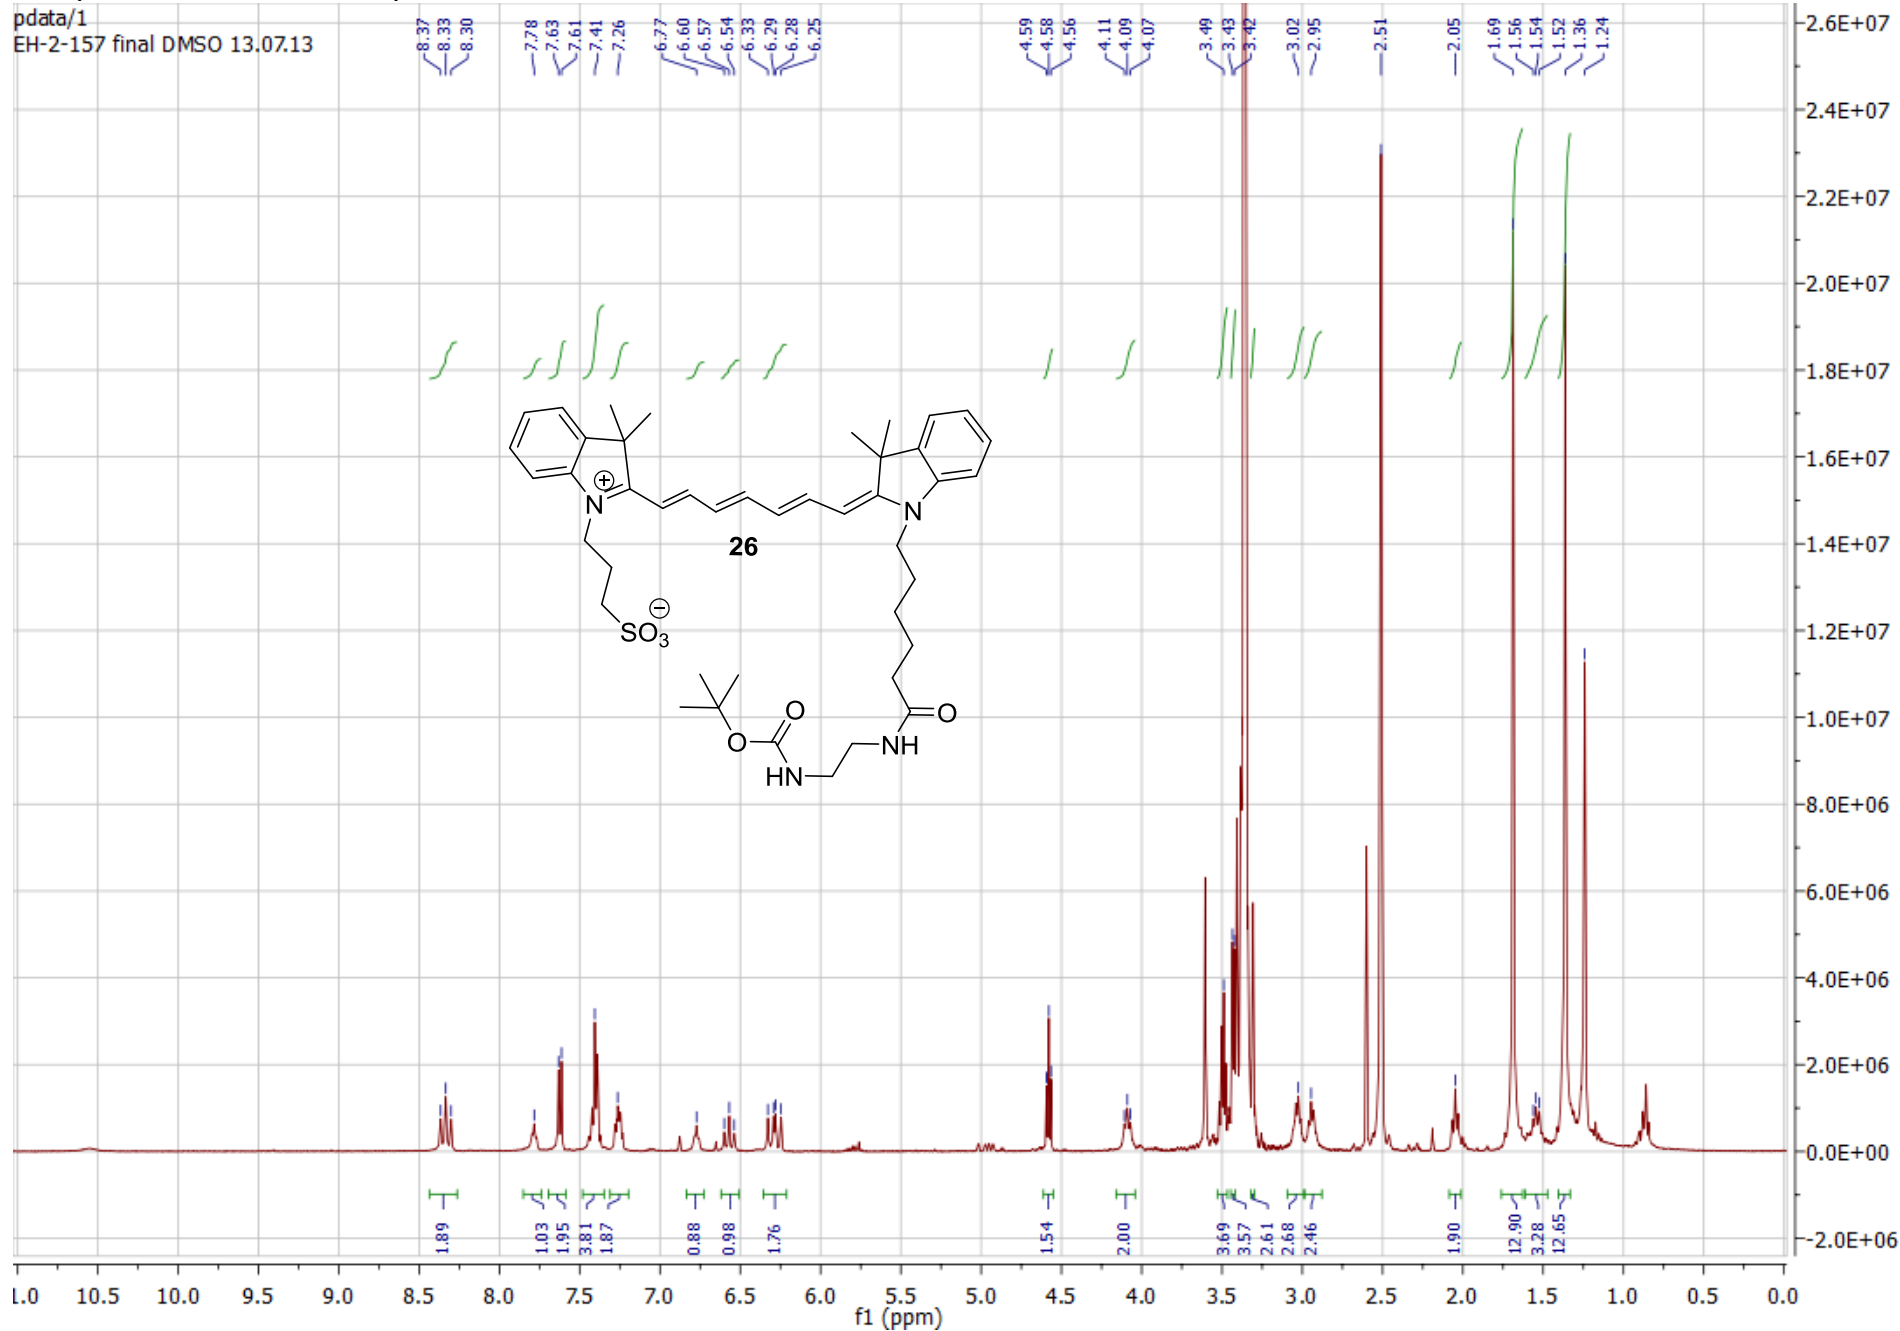

Compound **24** - MS (ESI+):  $m/z$  calc. for  $C_{24}H_{36}N_3O_3^+$ : 416.29; found: 416.4  $[M]^+$ .

Shabat\_Ehud\_EH-2-155 12 (0.199) Cm (11:12)

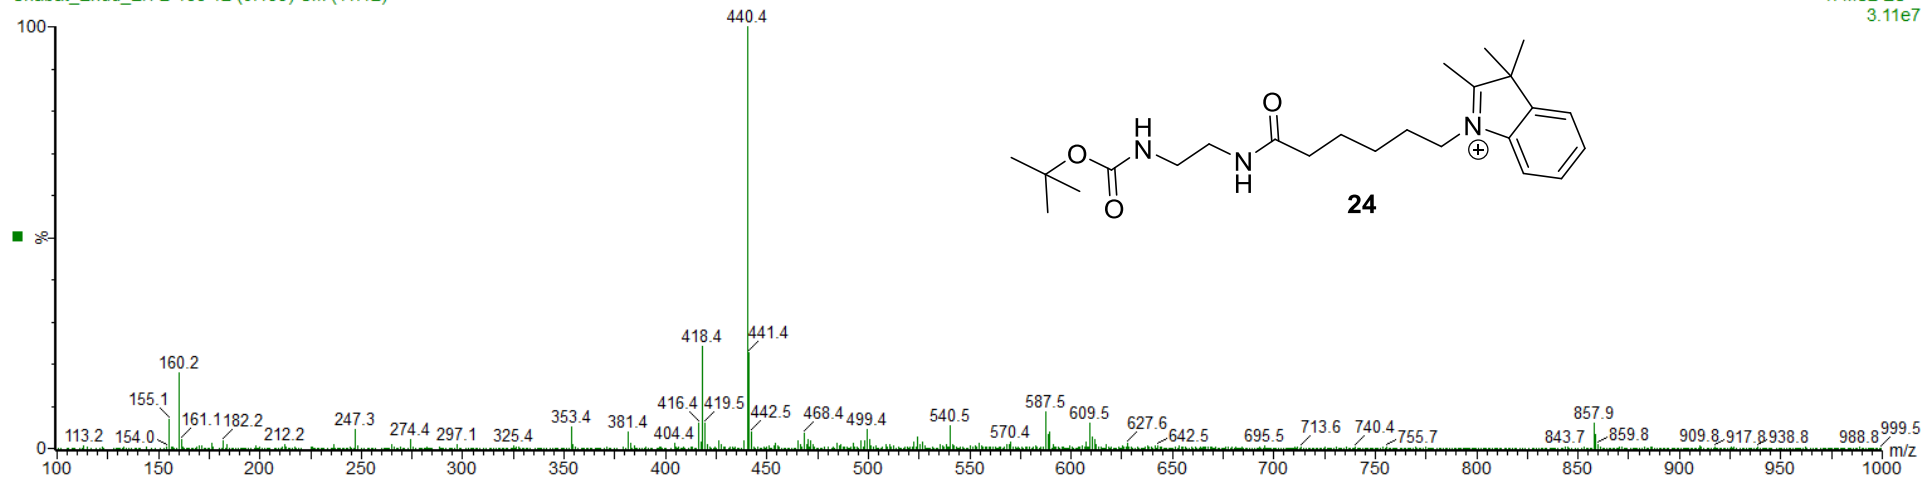

Compound **26** - MS (ESI+):  $m/z$  calc. for  $C_{43}H_{58}N_4NaO_6S^+$ : 781.39; found: 781.6  $[M + Na]^+$ .

Shabat\_Ehud\_EH-2-157\_sec\_2 13 (0.217) Cm (9:16)

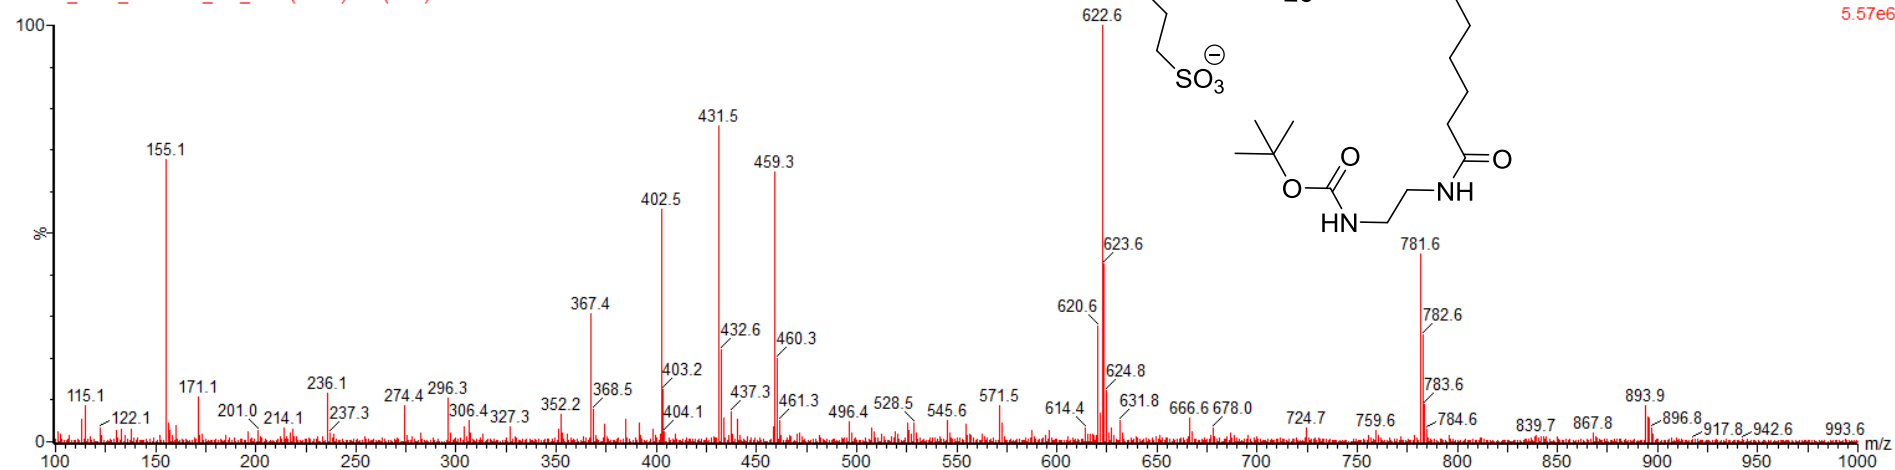

Compound **27** -  $^1\text{H}$  NMR spectrum in DMSO- $\text{d}_6$

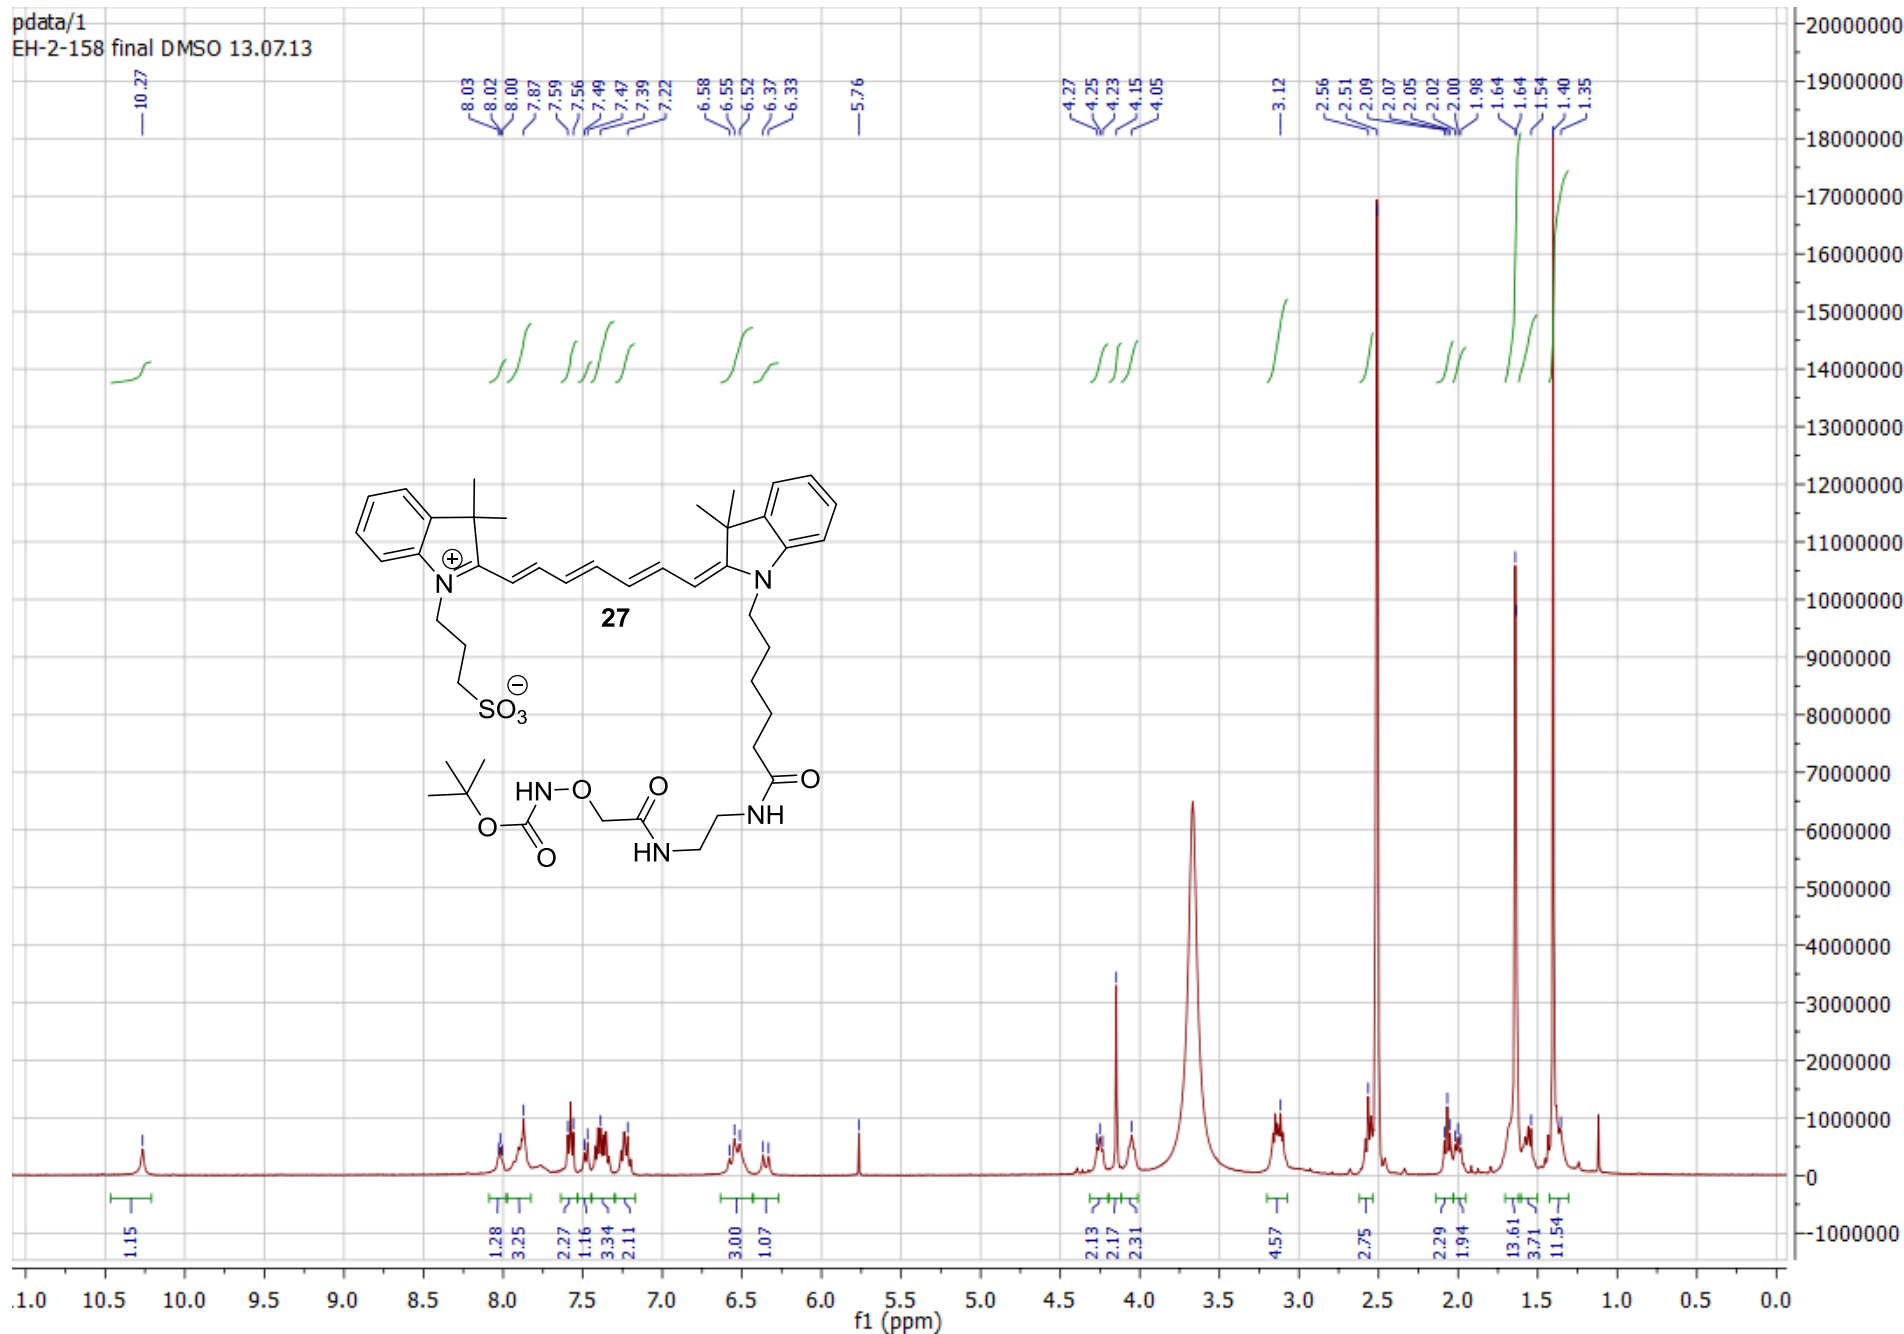

Compound **27** - MS (ESI+):  $m/z$  calc. for  $C_{45}H_{61}N_5NaO_8S^+$ : 854.41; found: 854.7  $[M + Na]^+$ .

EH-2-100 MeOH from DMSO D conc

Ehud

17-Jul-2013

Coll energy 3

Shabat\_Ehud\_EH-2-158 13 (0.217) Cm (11:16)

1: MS2 ES+

5.82e7

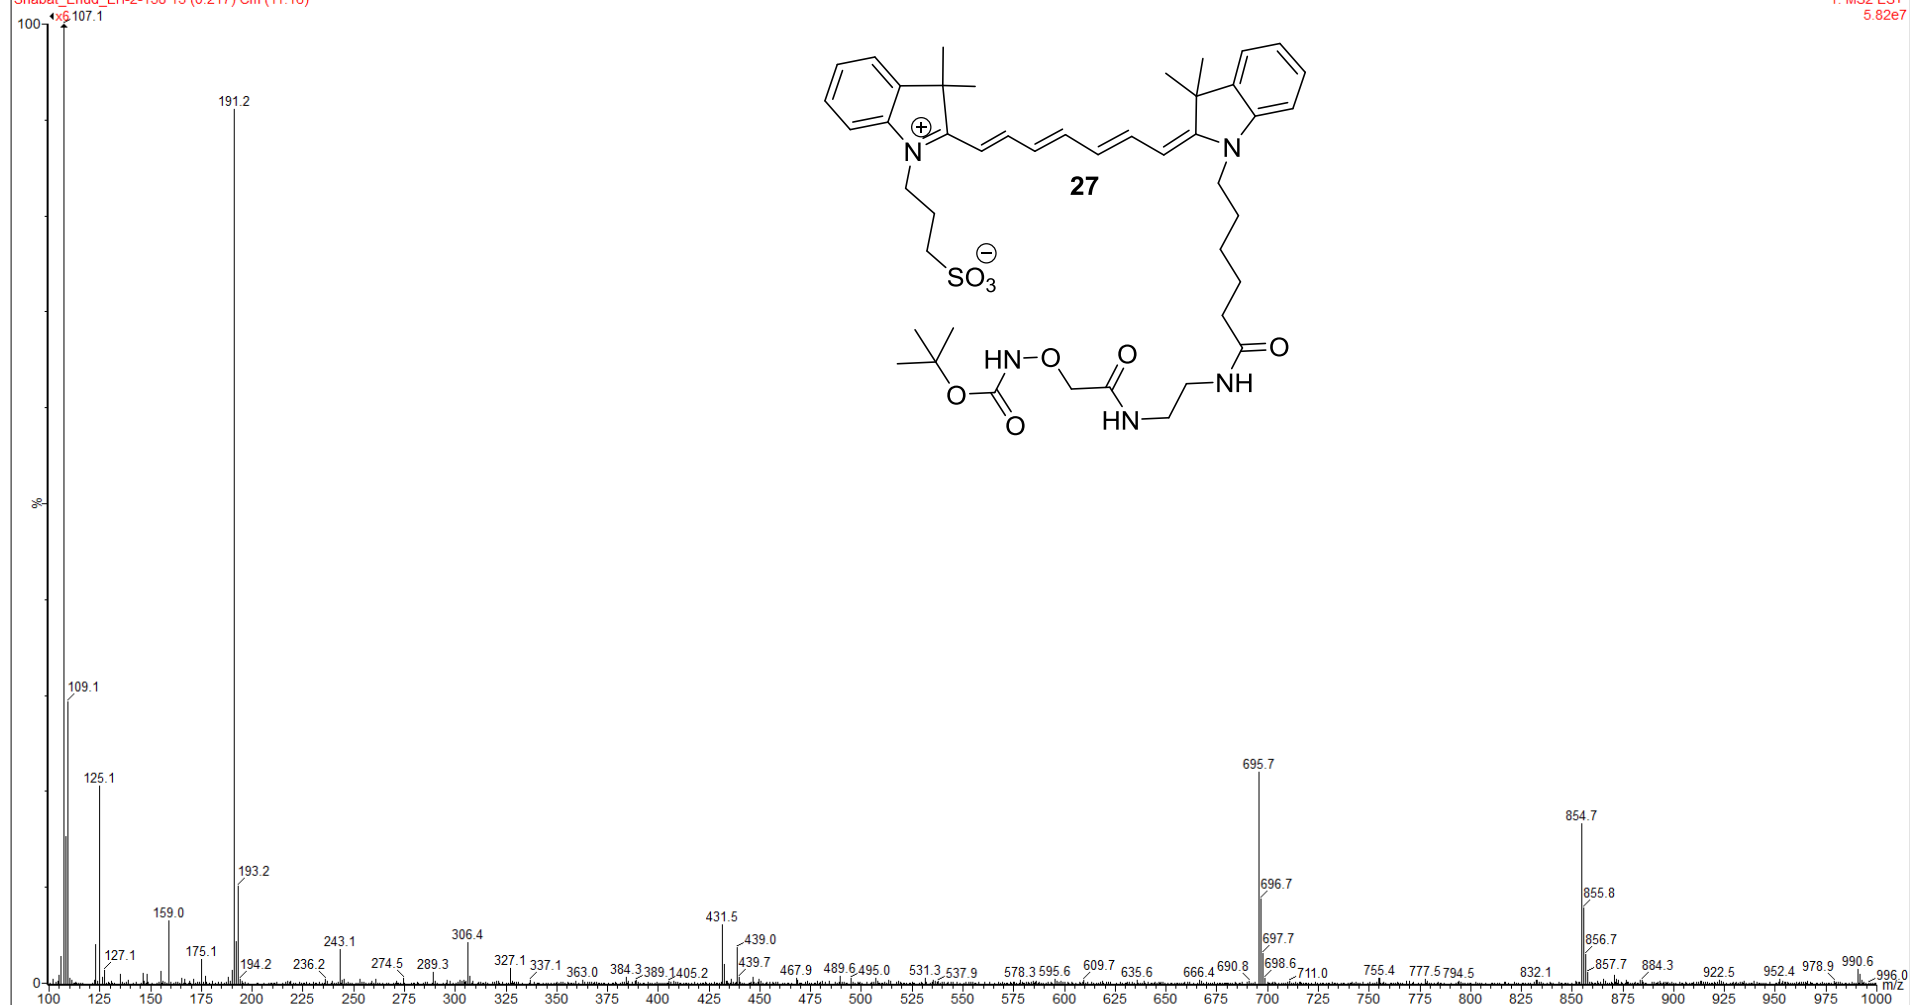

Compound **28** -  $^1\text{H}$  NMR spectrum in  $\text{DMSO-d}_6$

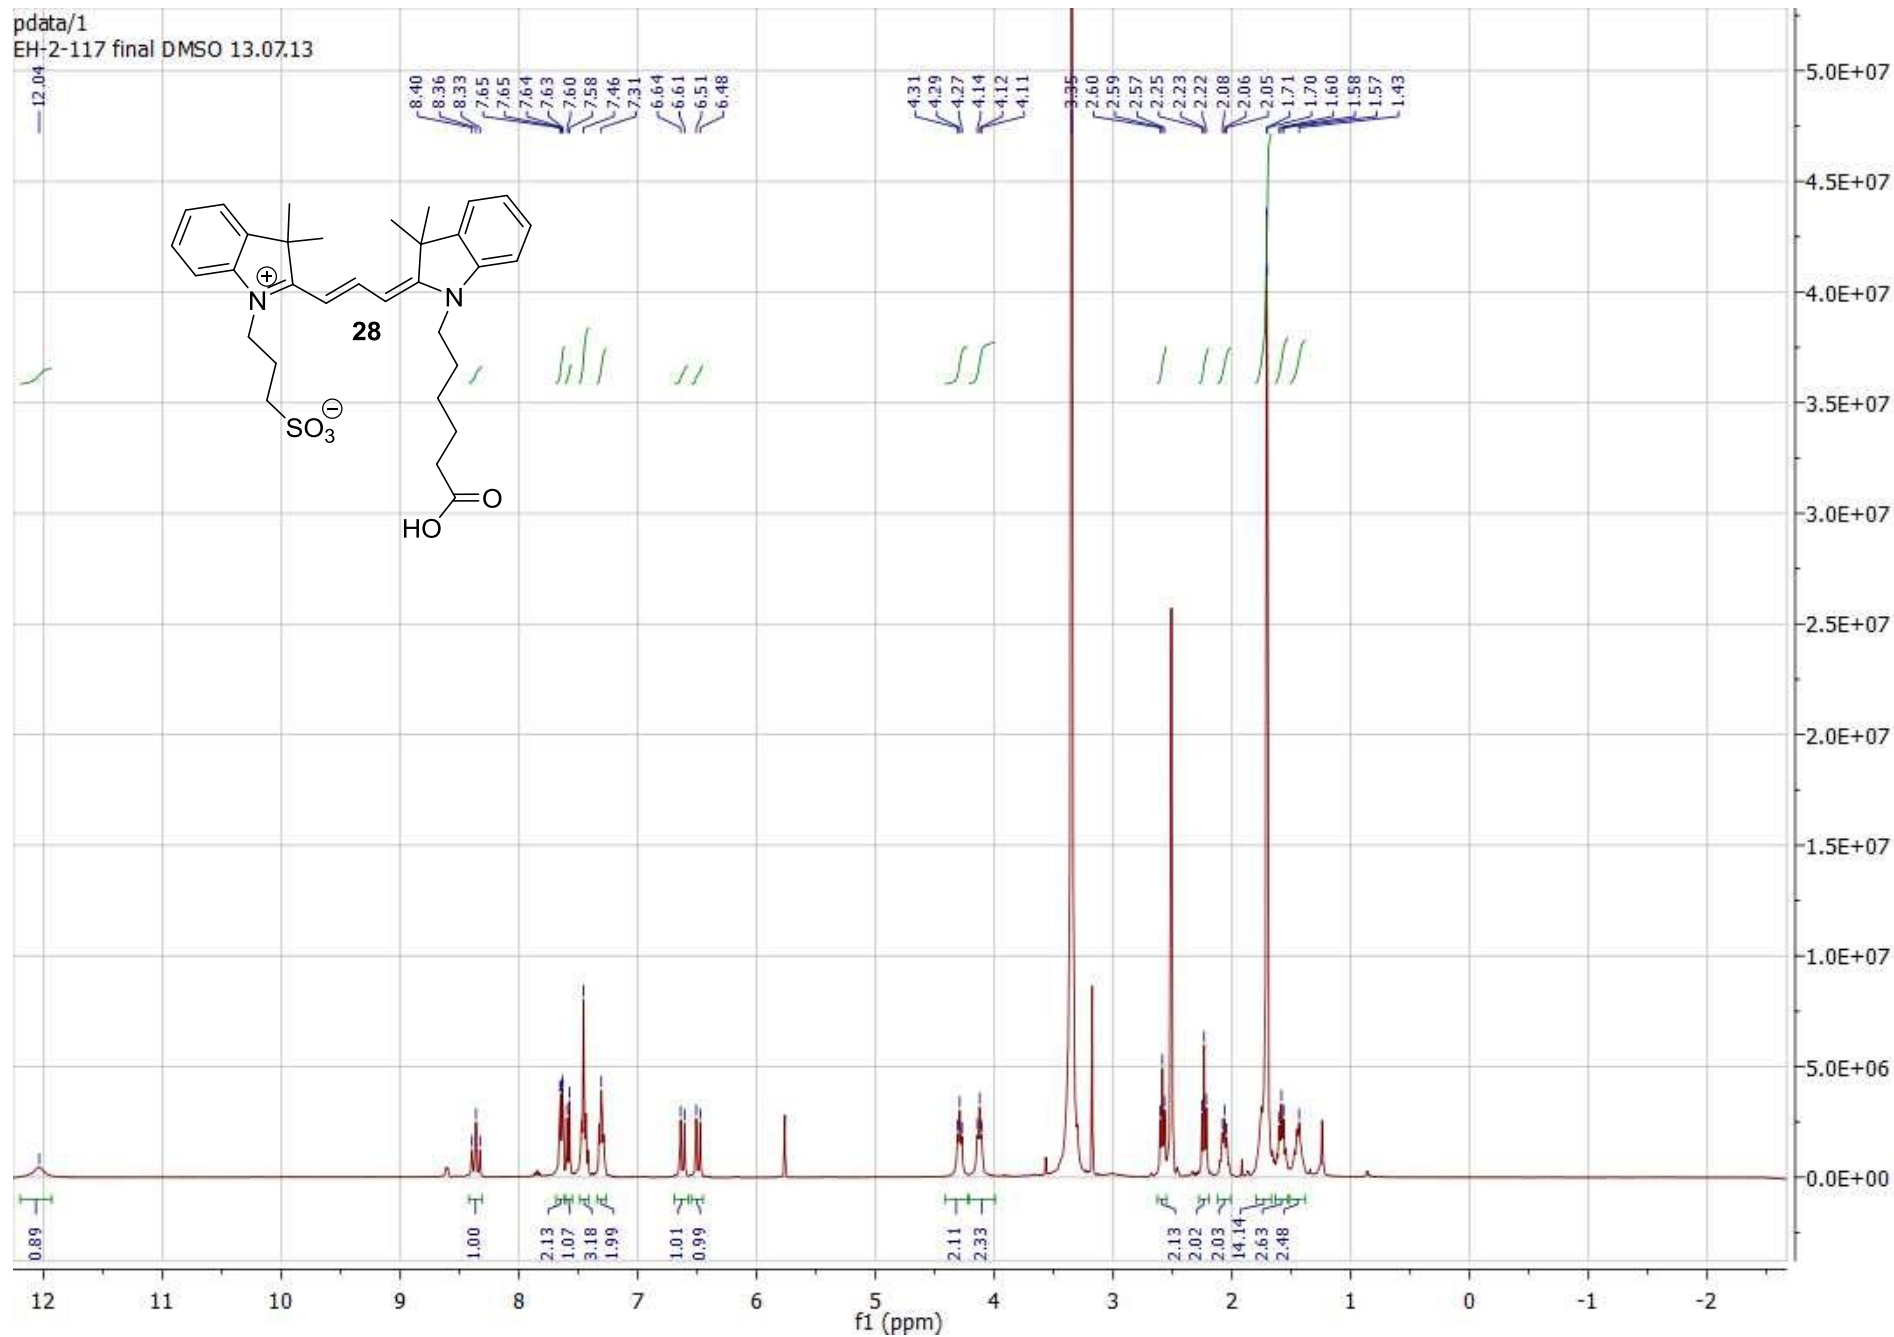

Compound **29** -  $^1\text{H}$  NMR spectrum in DMSO- $d_6$

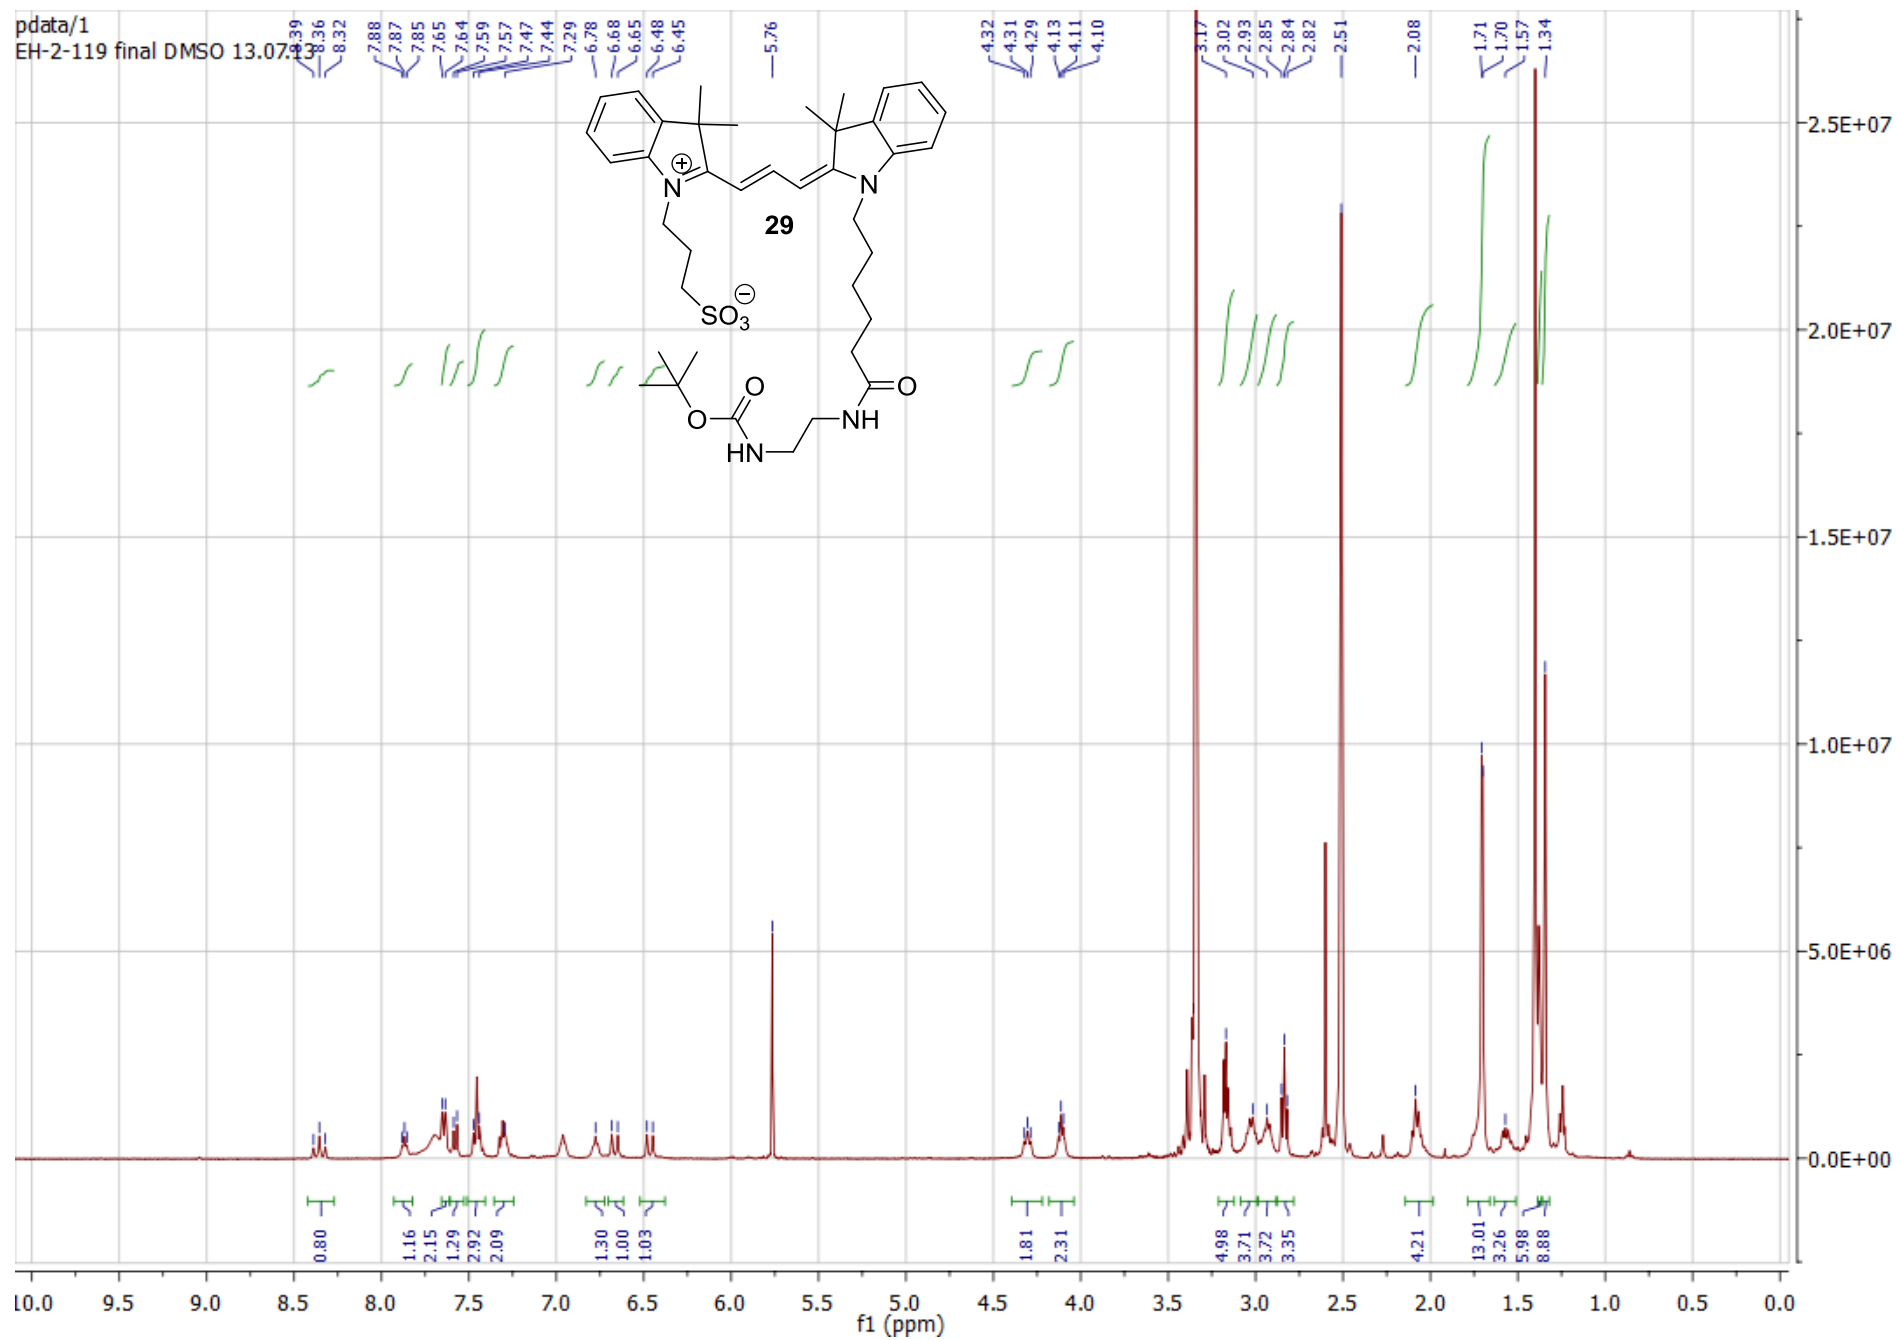



Compound **28** - MS (ESI+):  $m/z$  calc. for  $C_{32}H_{41}N_2NaO_5S^+$ : 587.25; found: 587.4  $[M + Na]^+$ .

Shabat\_Ehud\_EH-2-117 14 (0.234) Cm (11:18)

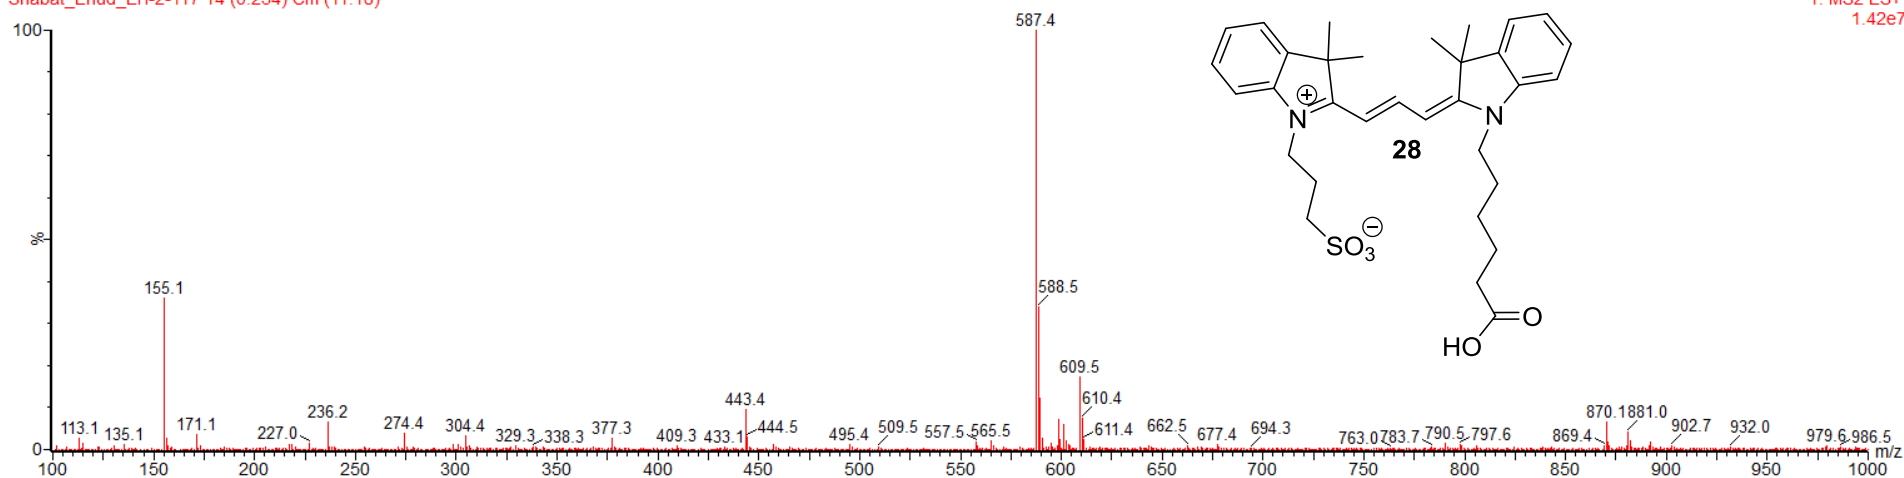

Compound **29** - MS (ESI+):  $m/z$  calc. for  $C_{39}H_{54}N_4NaO_6S^+$ : 729.36; found: 729.6  $[M + Na]^+$ .

Shabat\_Ehud\_EH-2-119 12 (0.199) Cm (8:21)

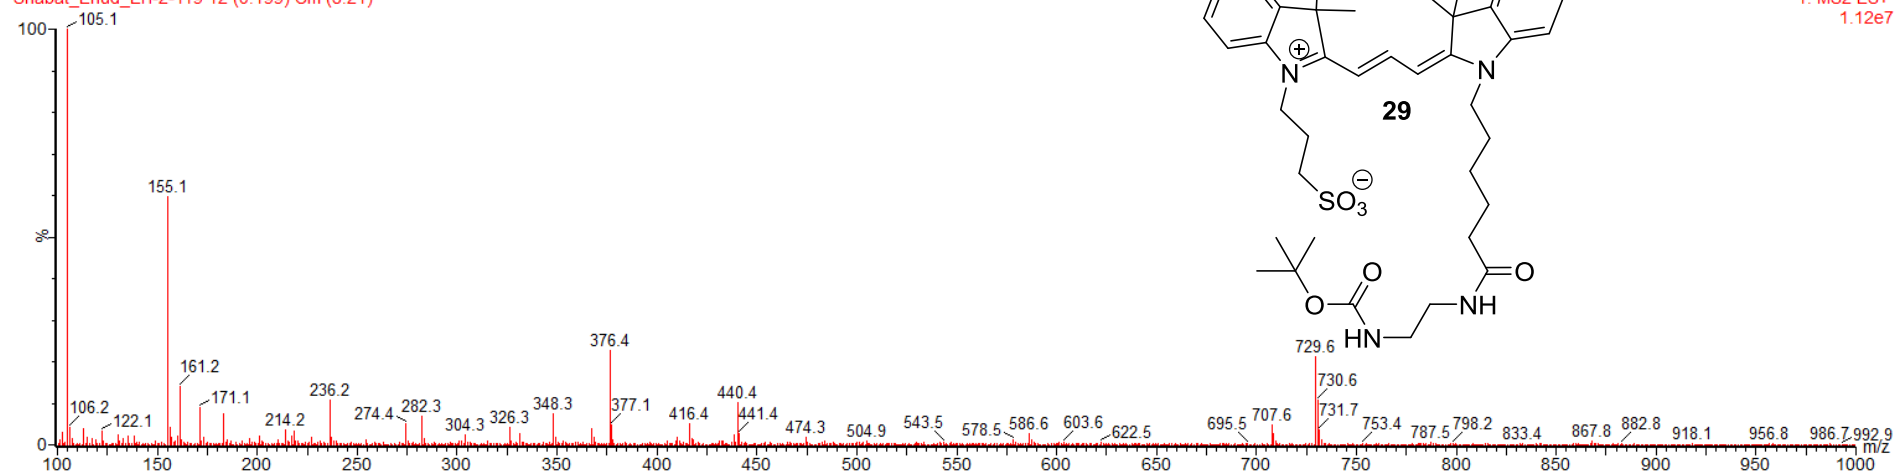

Compound **12** -  $^1\text{H}$  NMR spectrum in  $\text{DMSO-d}_6$

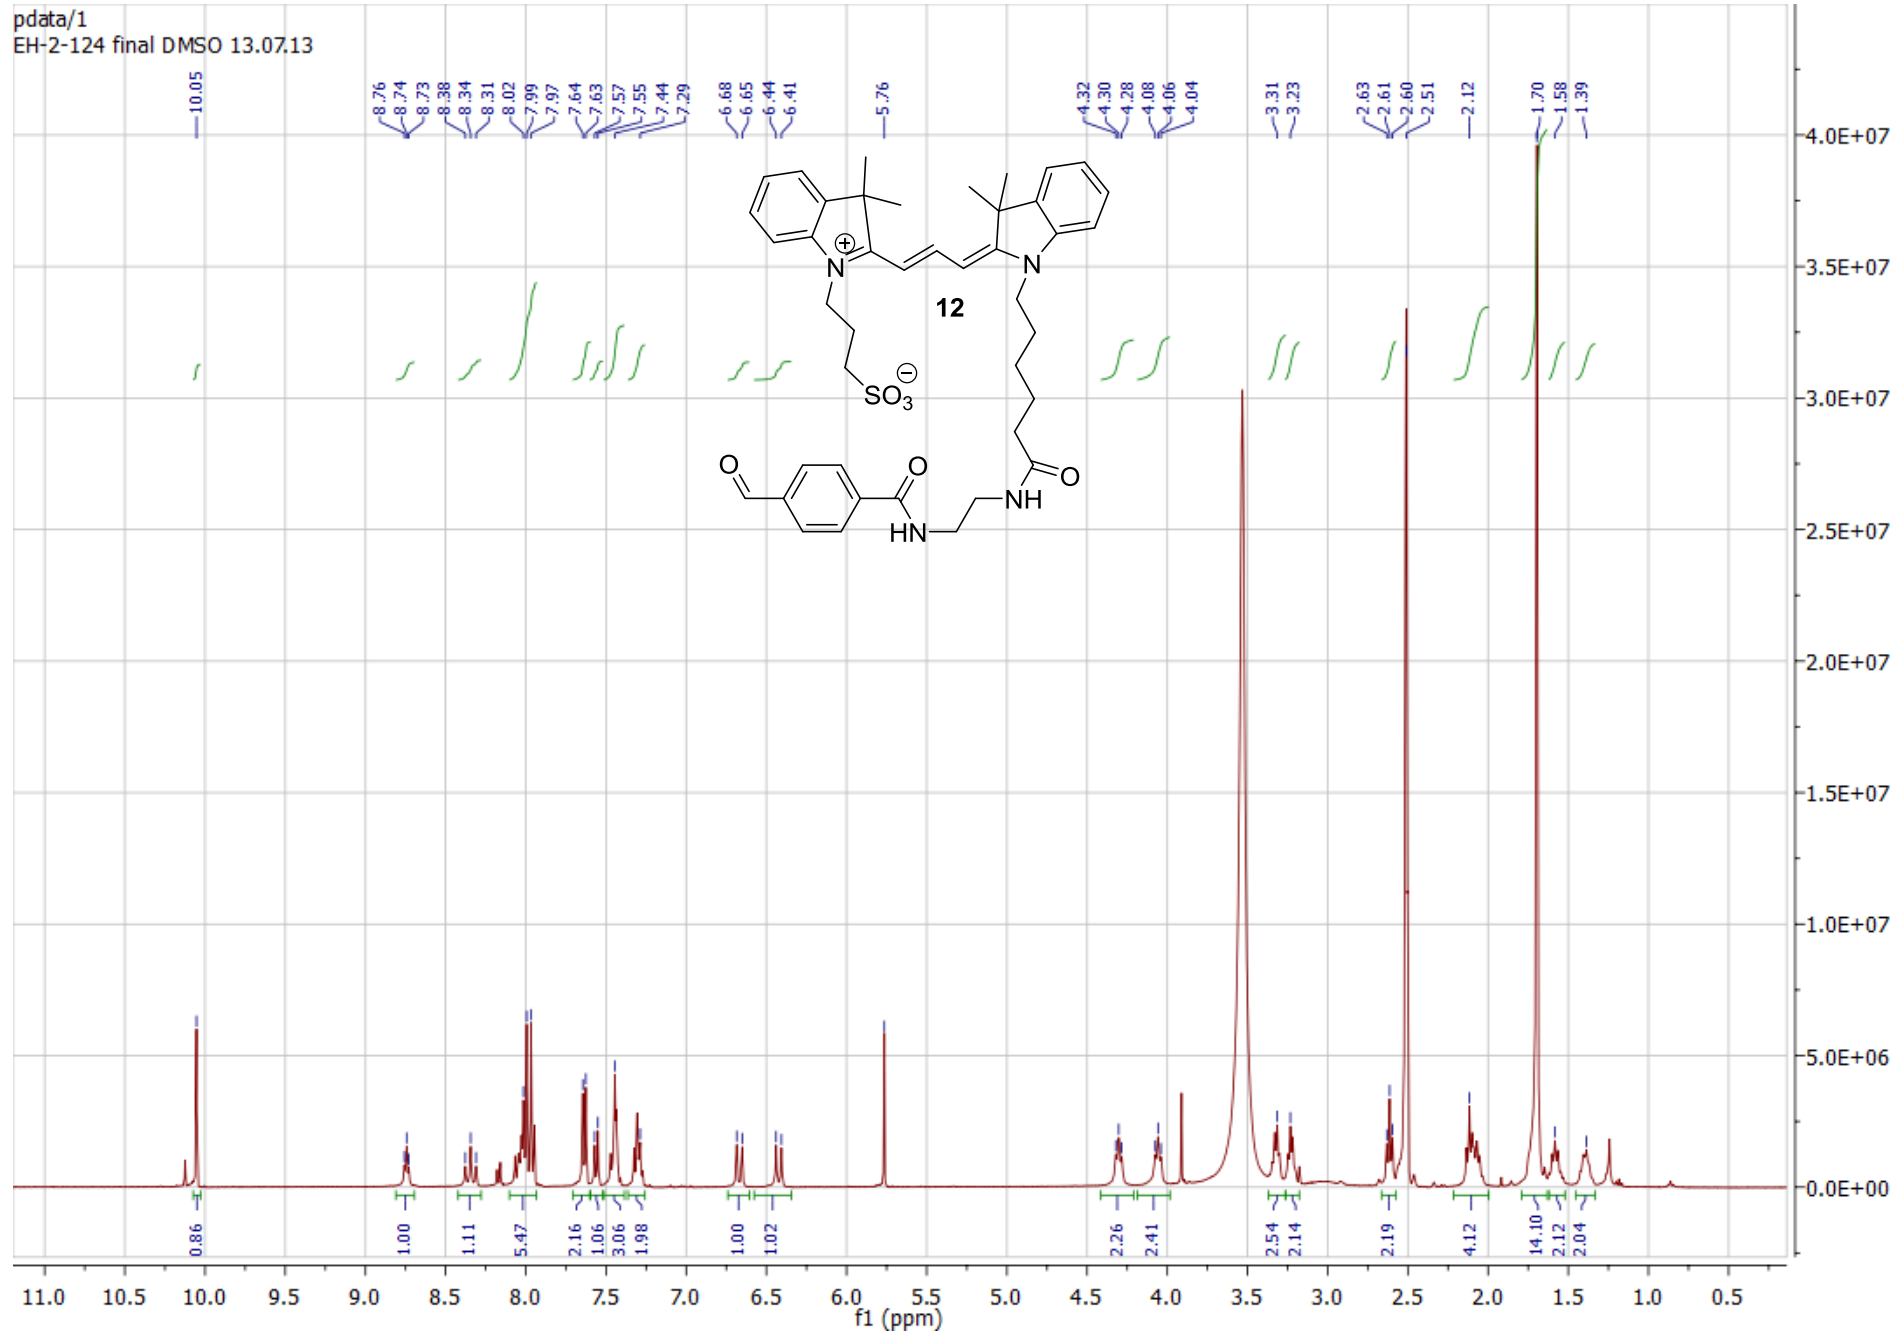

Compound **12** - MS (ESI+):  $m/z$  calc. for  $C_{42}H_{50}N_4NaO_6S^+$ : 761.34; found: 761.6  $[M + Na]^+$ .

Shabat\_Ehud\_EH-2-124 13 (0.216) Cm (7:20)

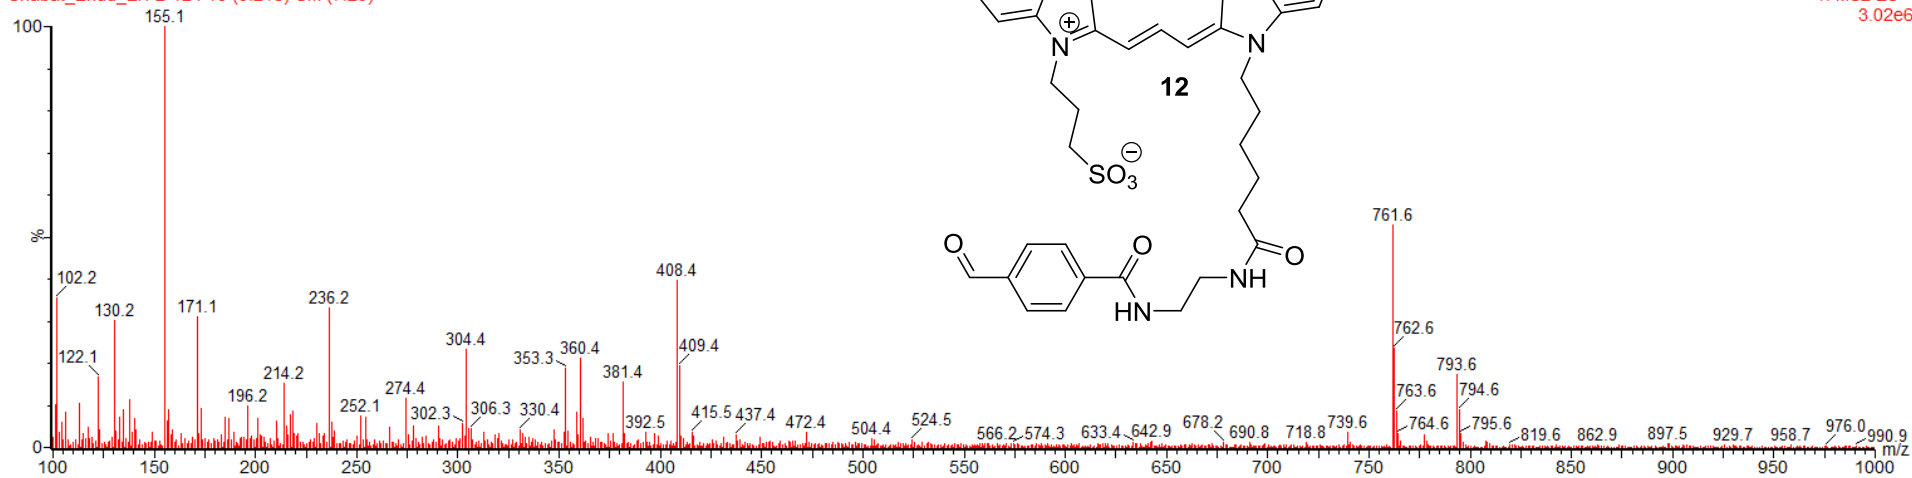

Compound **18a** -  $^1\text{H}$  NMR spectrum in DMSO- $d_6$

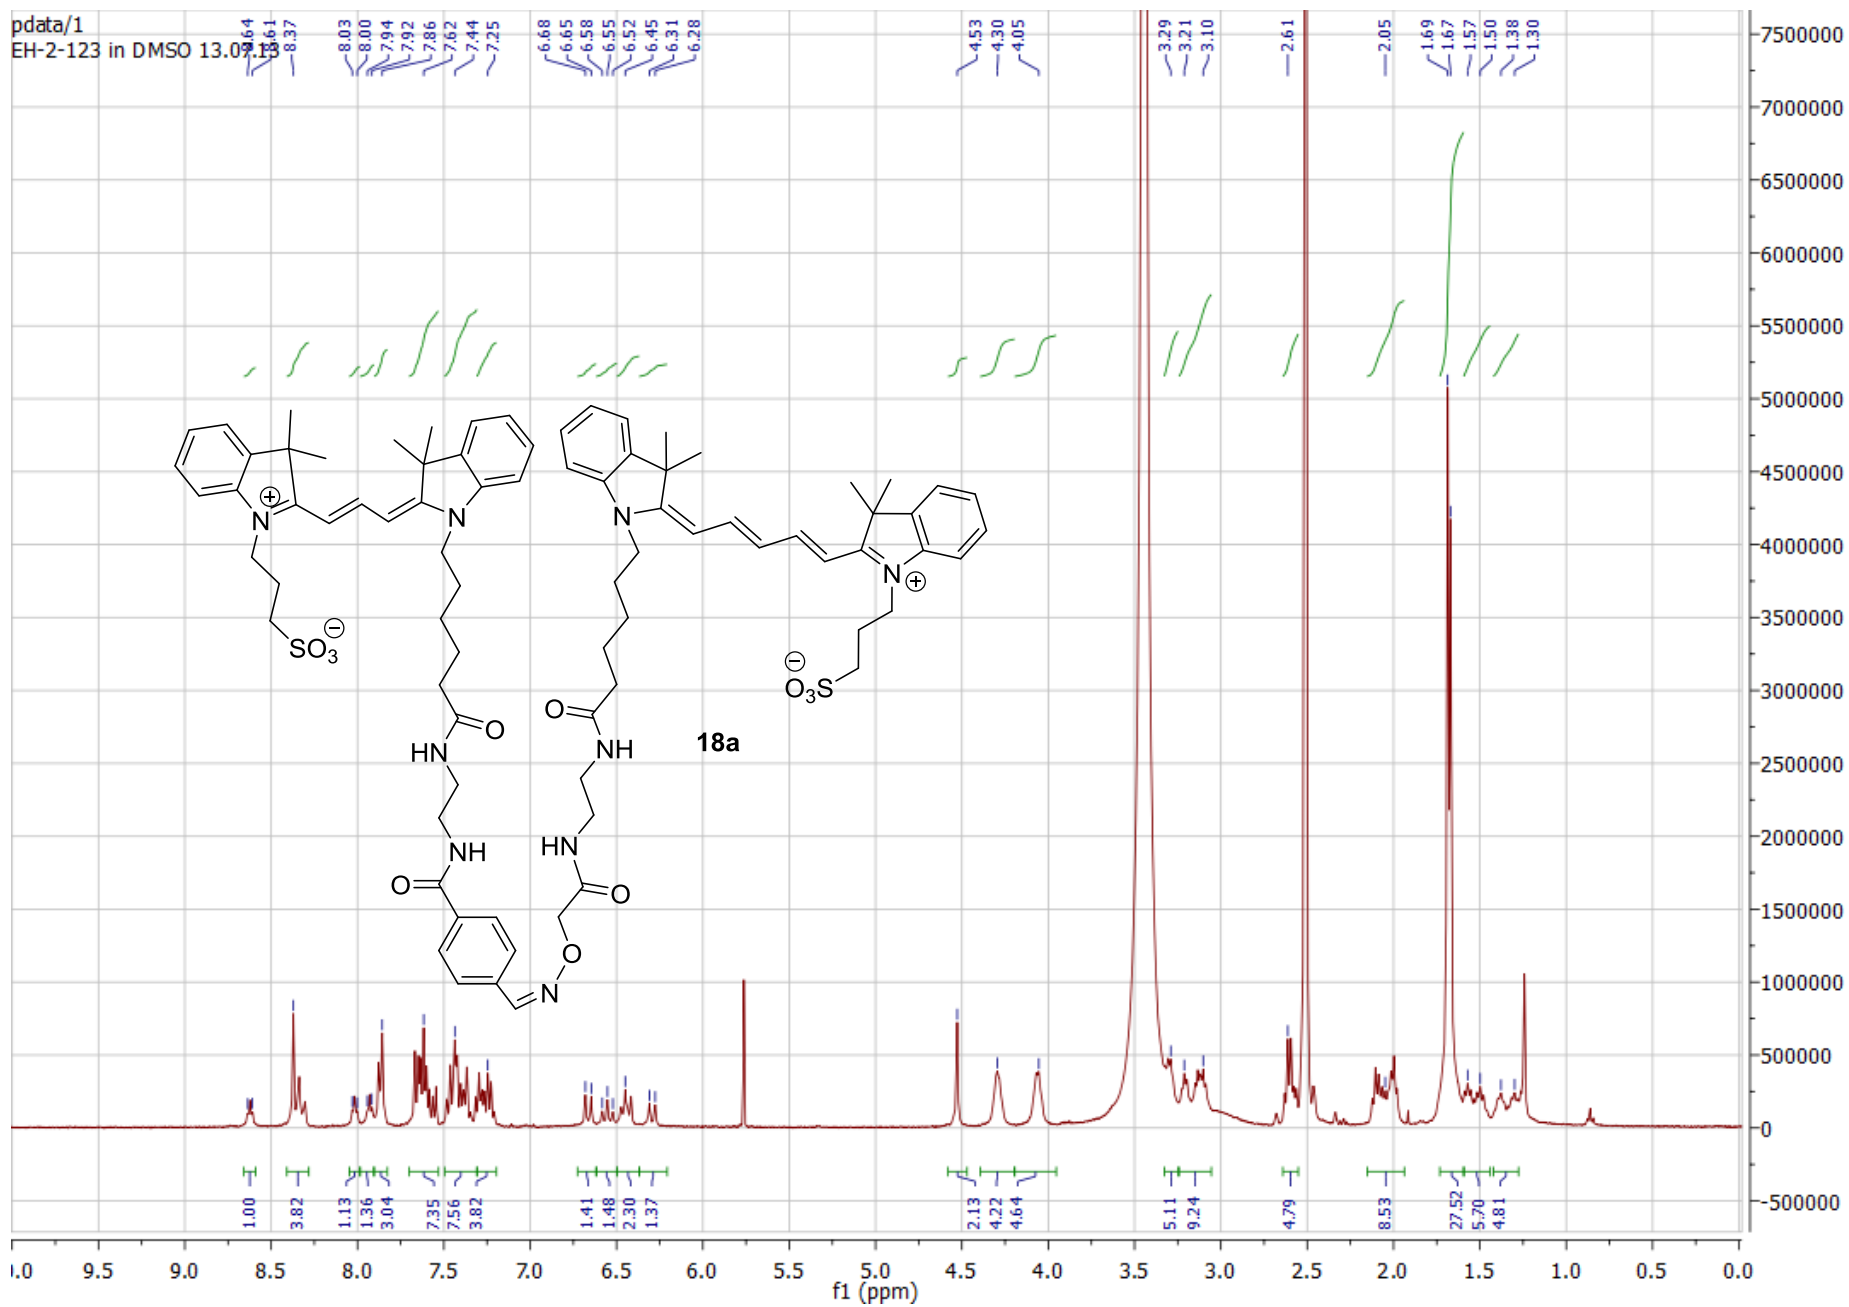

Compound **18a** - MS (ESI+):  $m/z$  calc. for  $C_{80}H_{99}N_9Na_2O_{11}S_2^{2+}$ : 735.83; found: 735.9  $[M + 2Na]^{2+}$ .

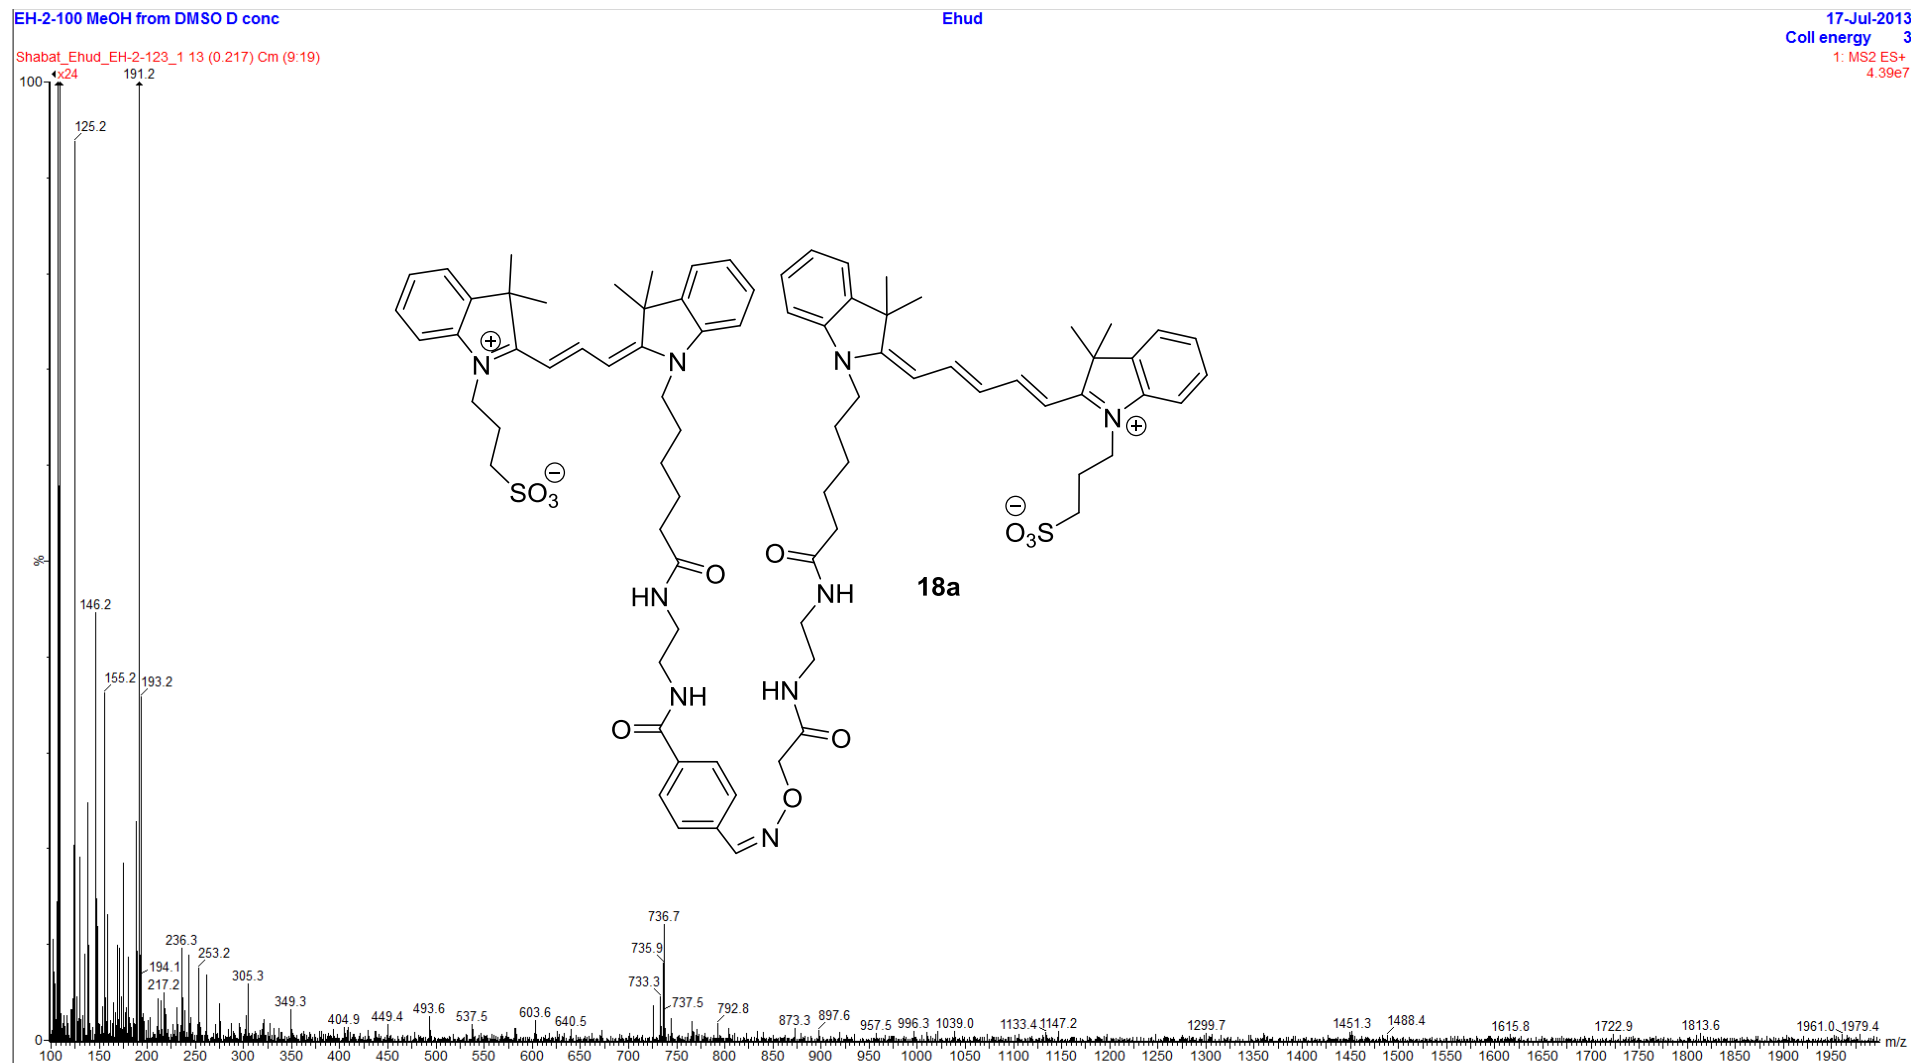

Compound **31**-  $^1\text{H}$  NMR spectrum in DMSO- $\text{d}_6$

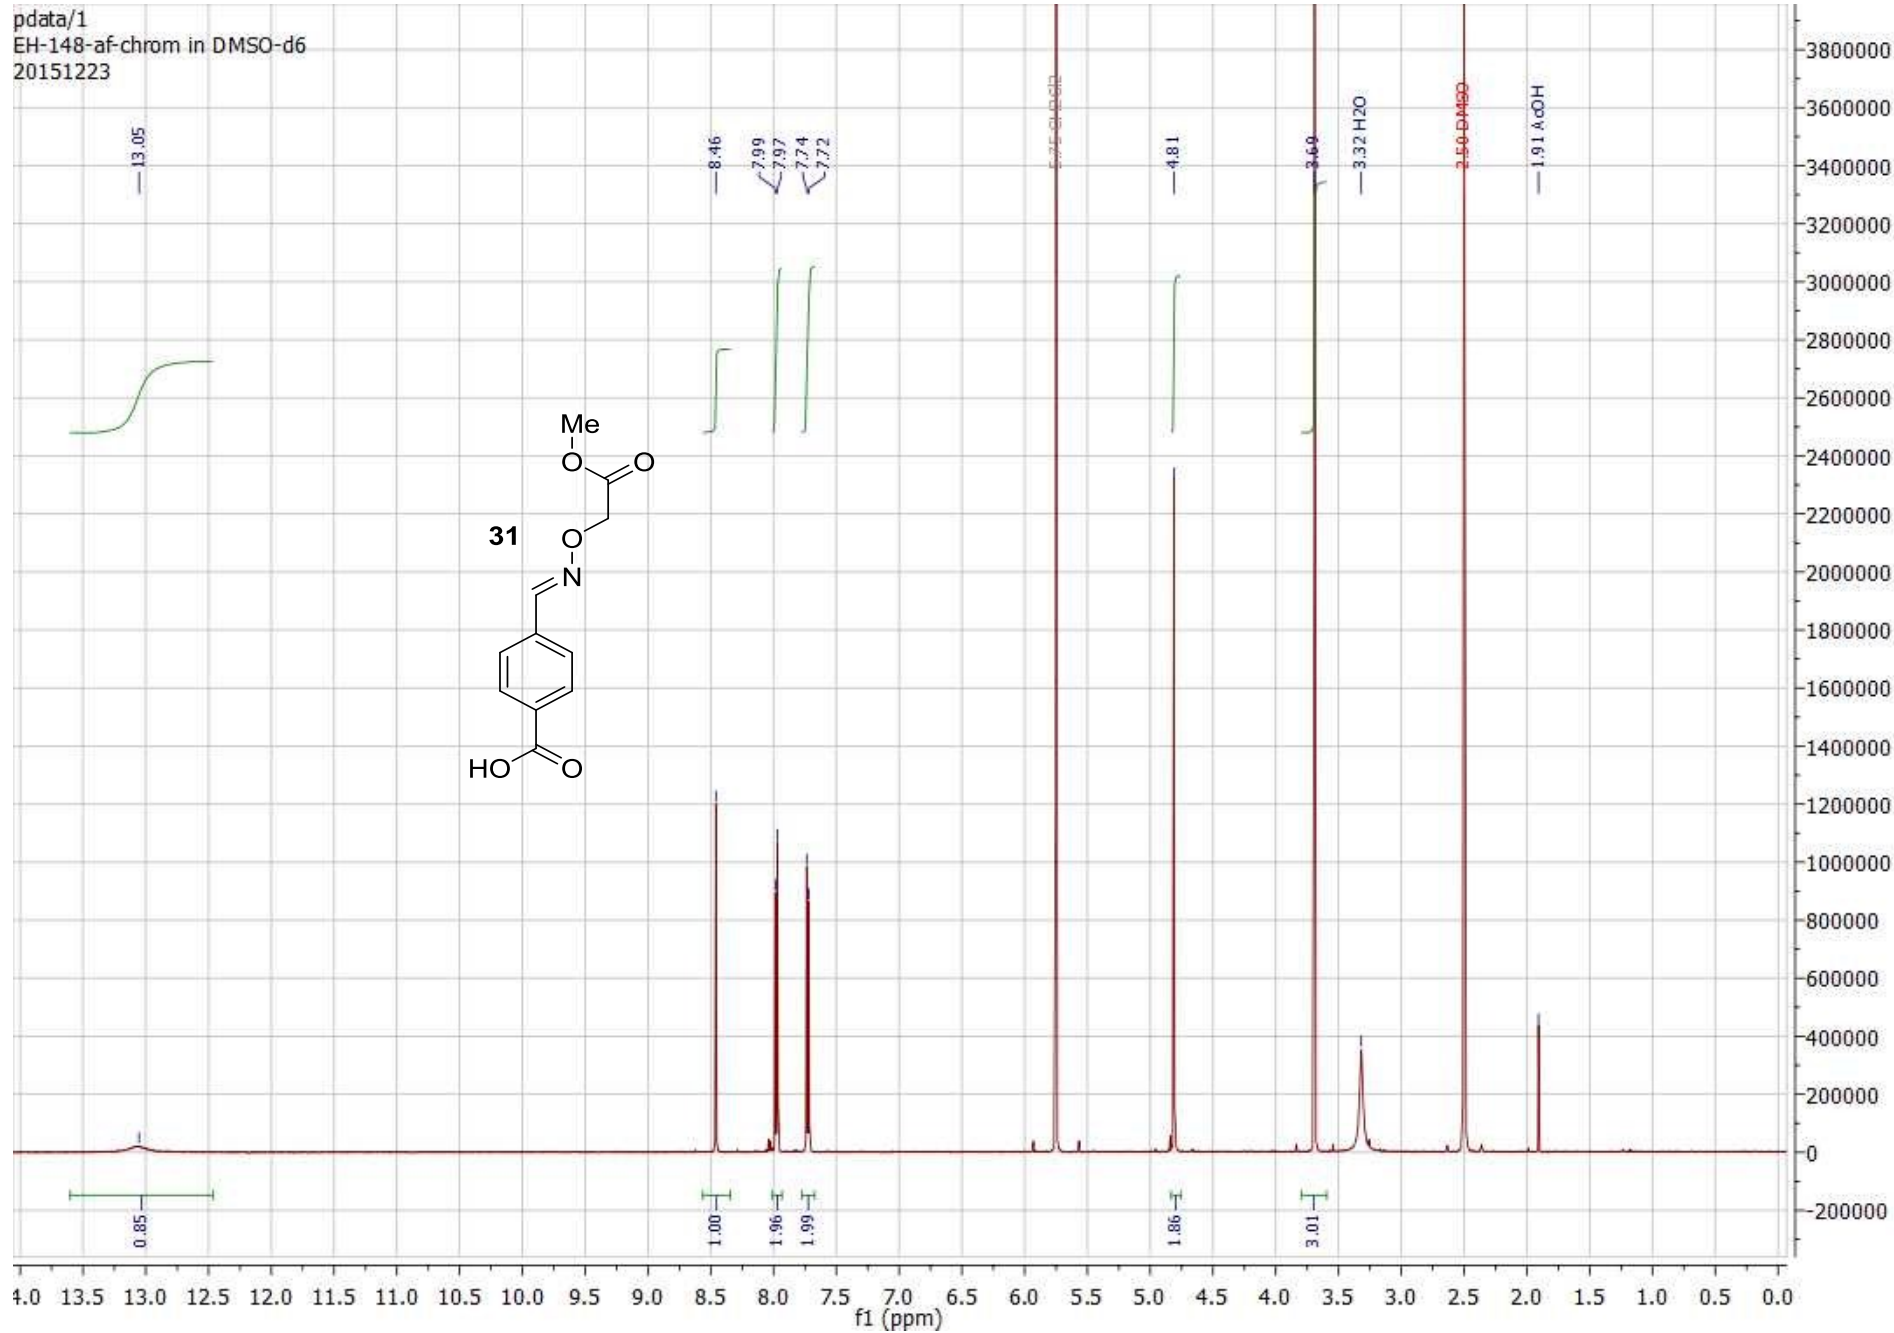

Compound **31** - MS (ESI+):  $m/z$  calc. for  $C_{11}H_{11}NNaO_5^+$ : 260.05; found: 260.038  $[M + Na]^+$ ; MS (ESI-):  $m/z$  calc. for  $C_{11}H_{10}NO_5^-$ : 236.06; found: 236.06  $[M - H]^-$ .

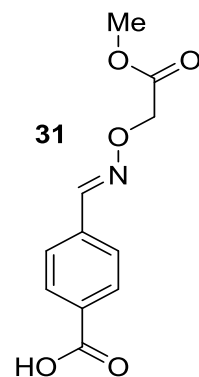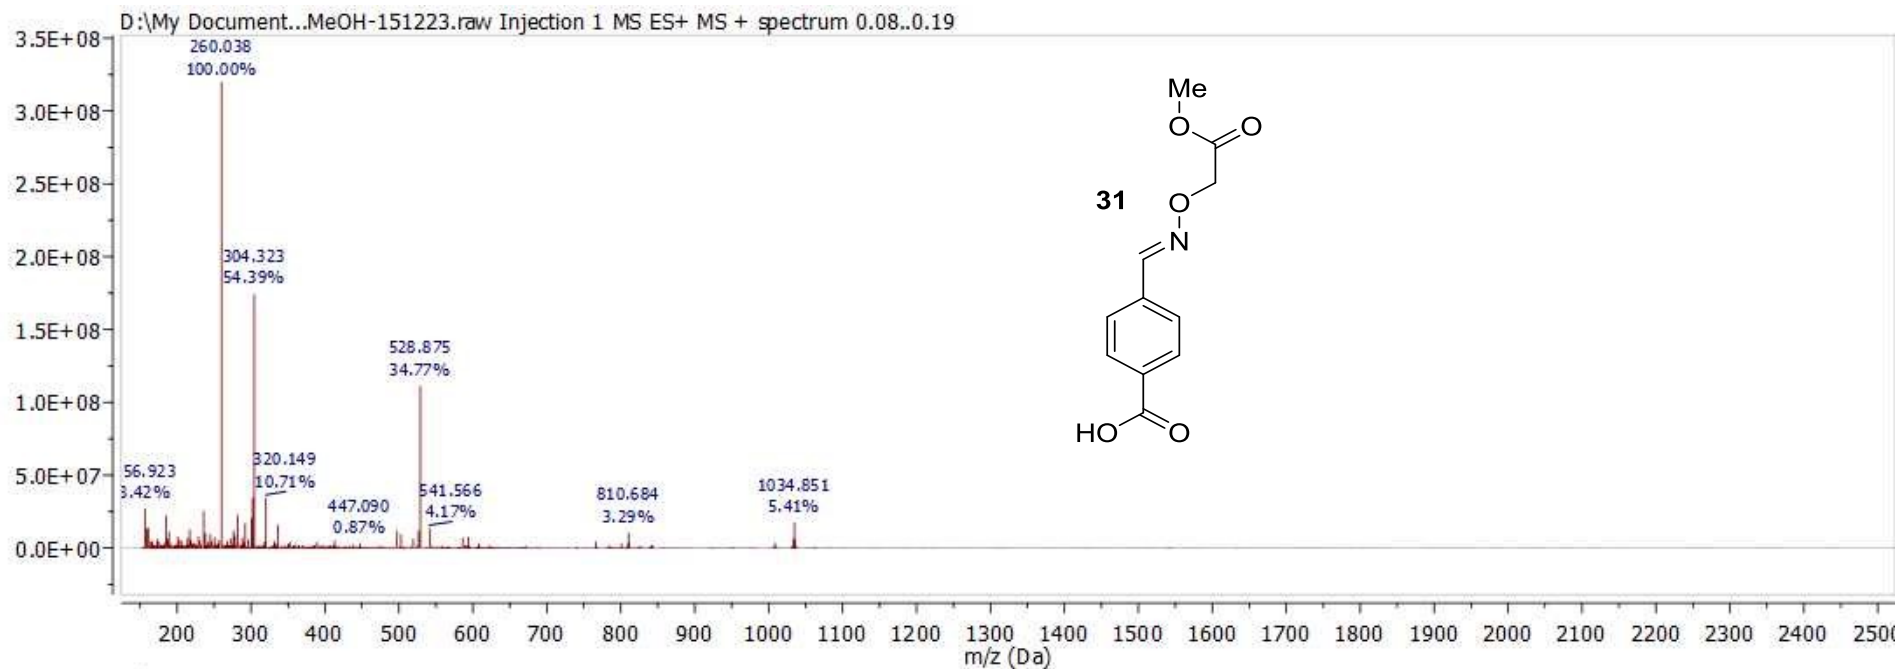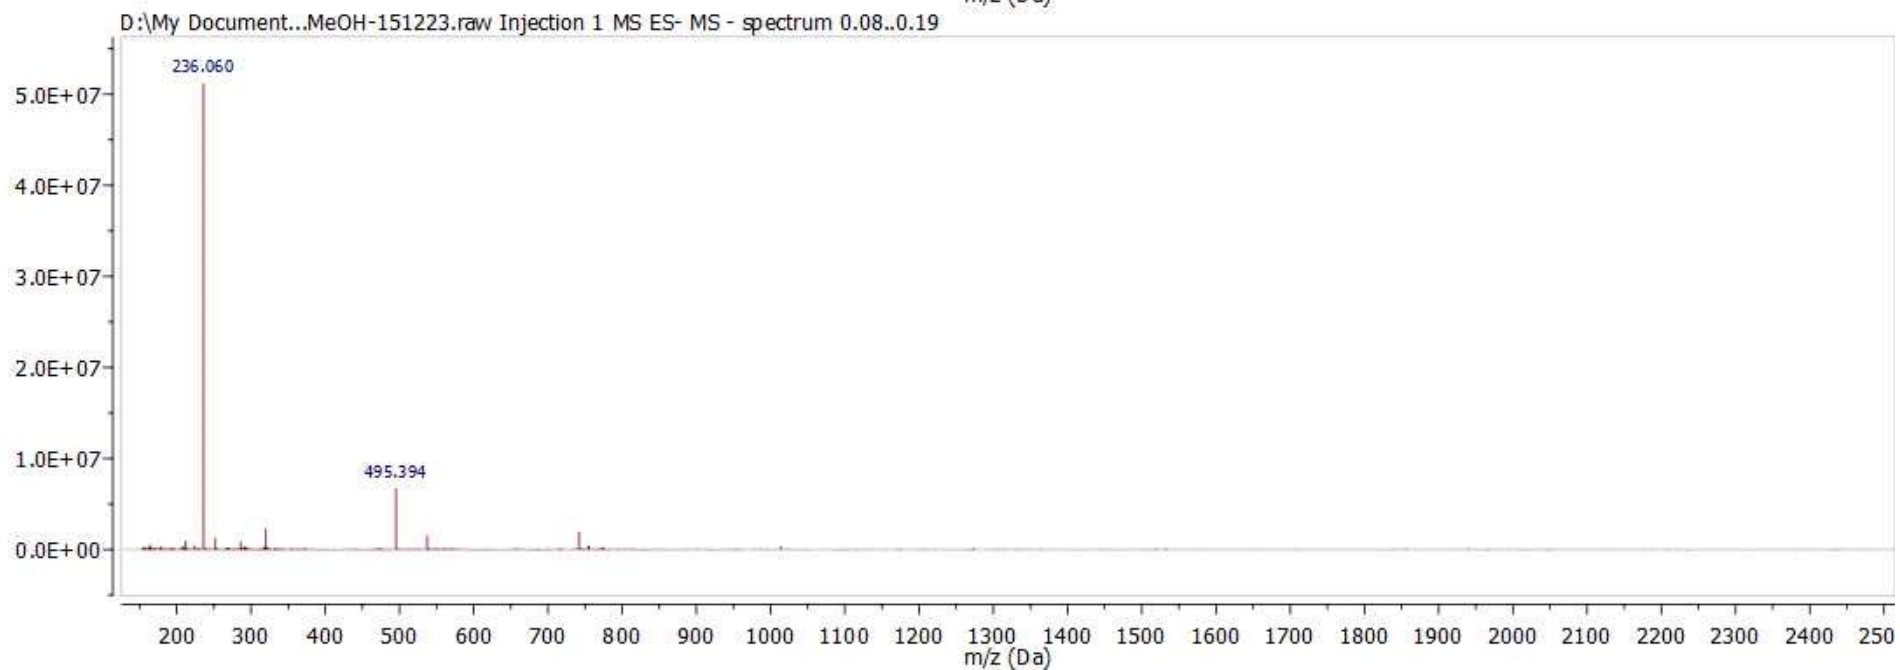

Compound **30** -  $^1\text{H}$  NMR spectrum in  $\text{DMSO-d}_6$

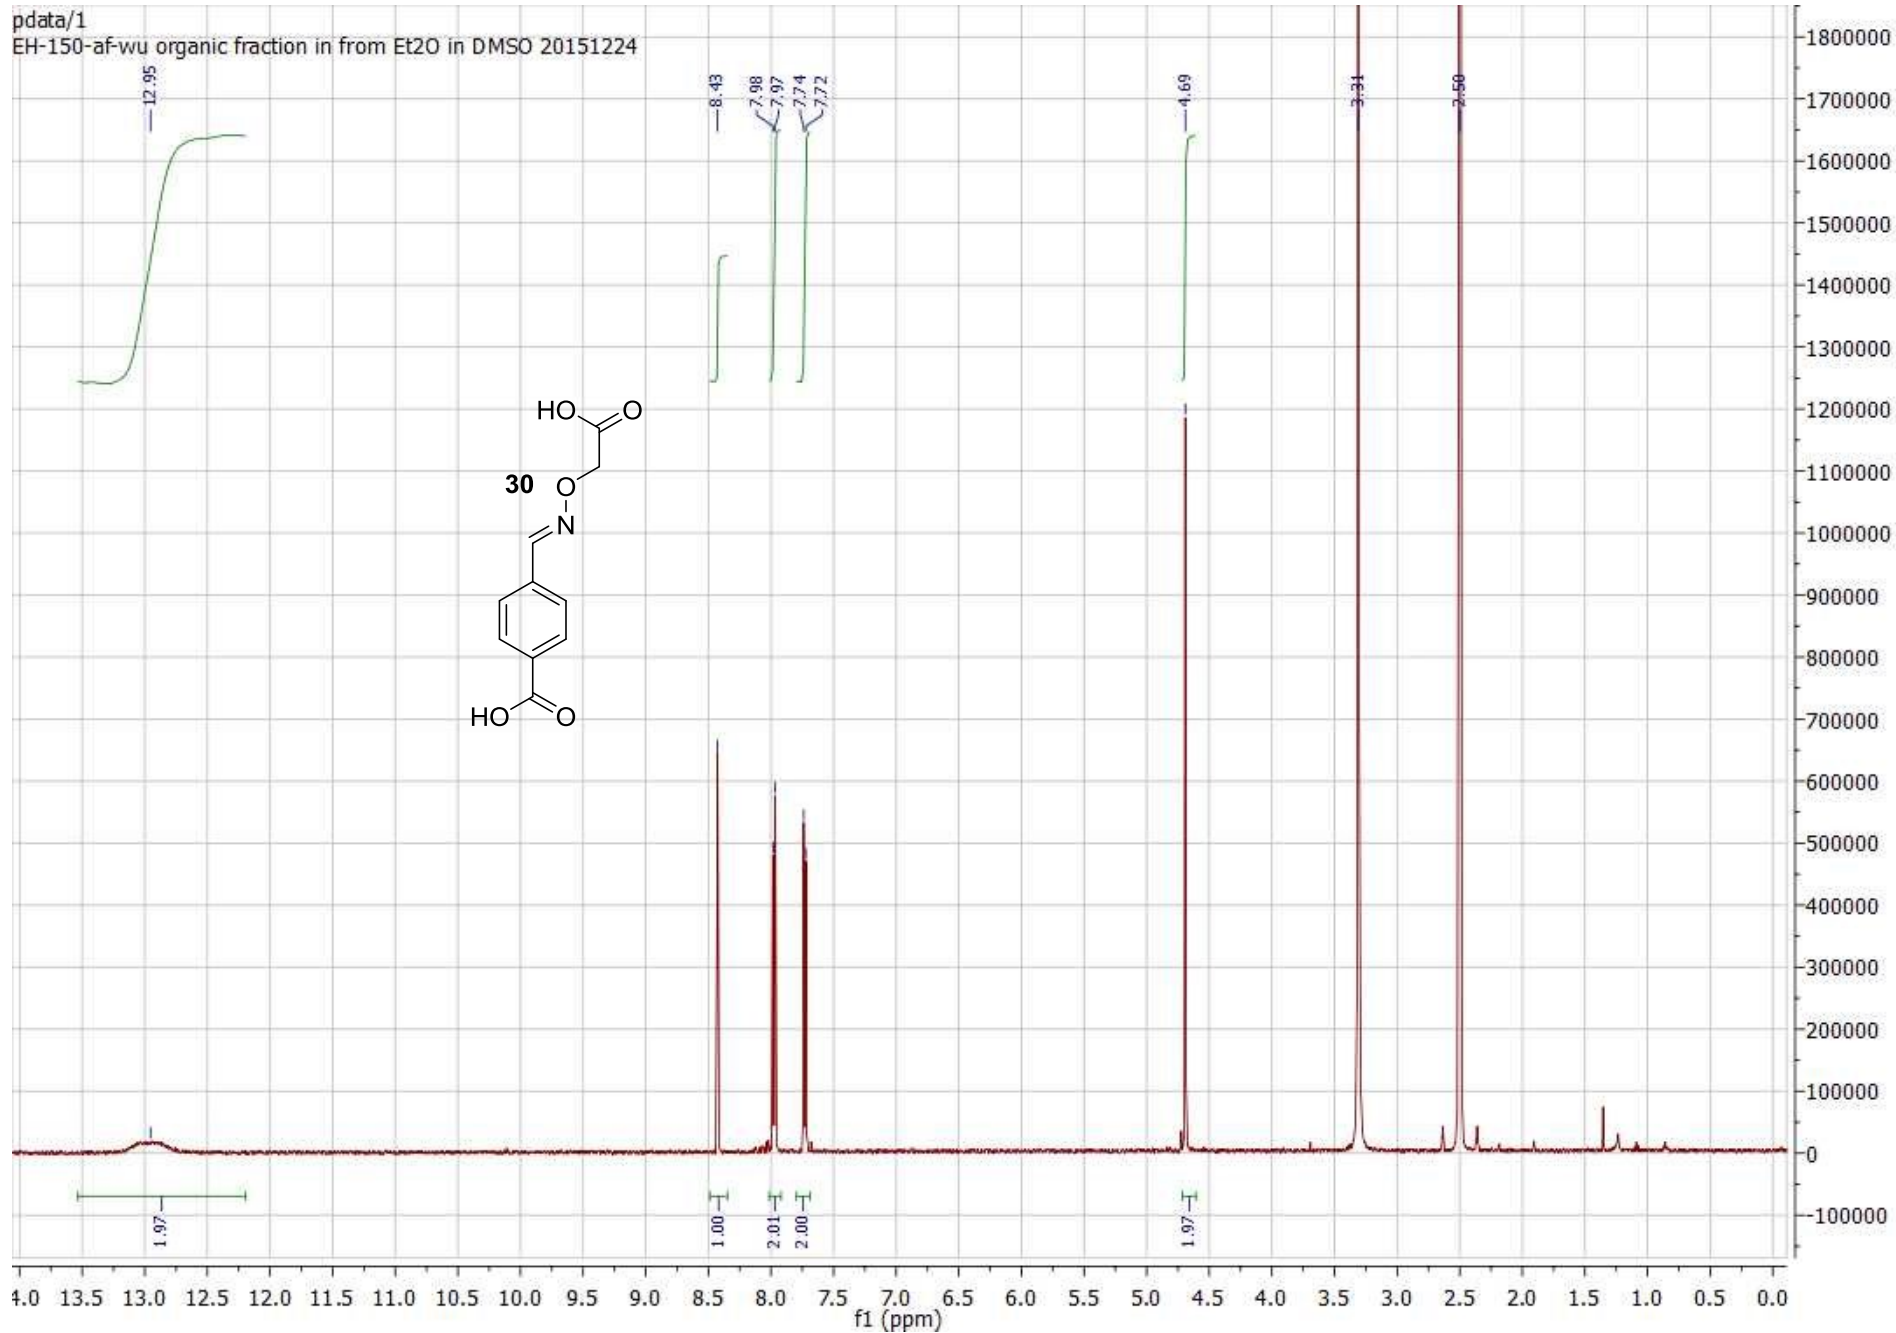



Compound **30**-  $^1\text{H}$  NMR spectrum in dPBS (pH 7.4) with 7.5% DMSO (v/v)

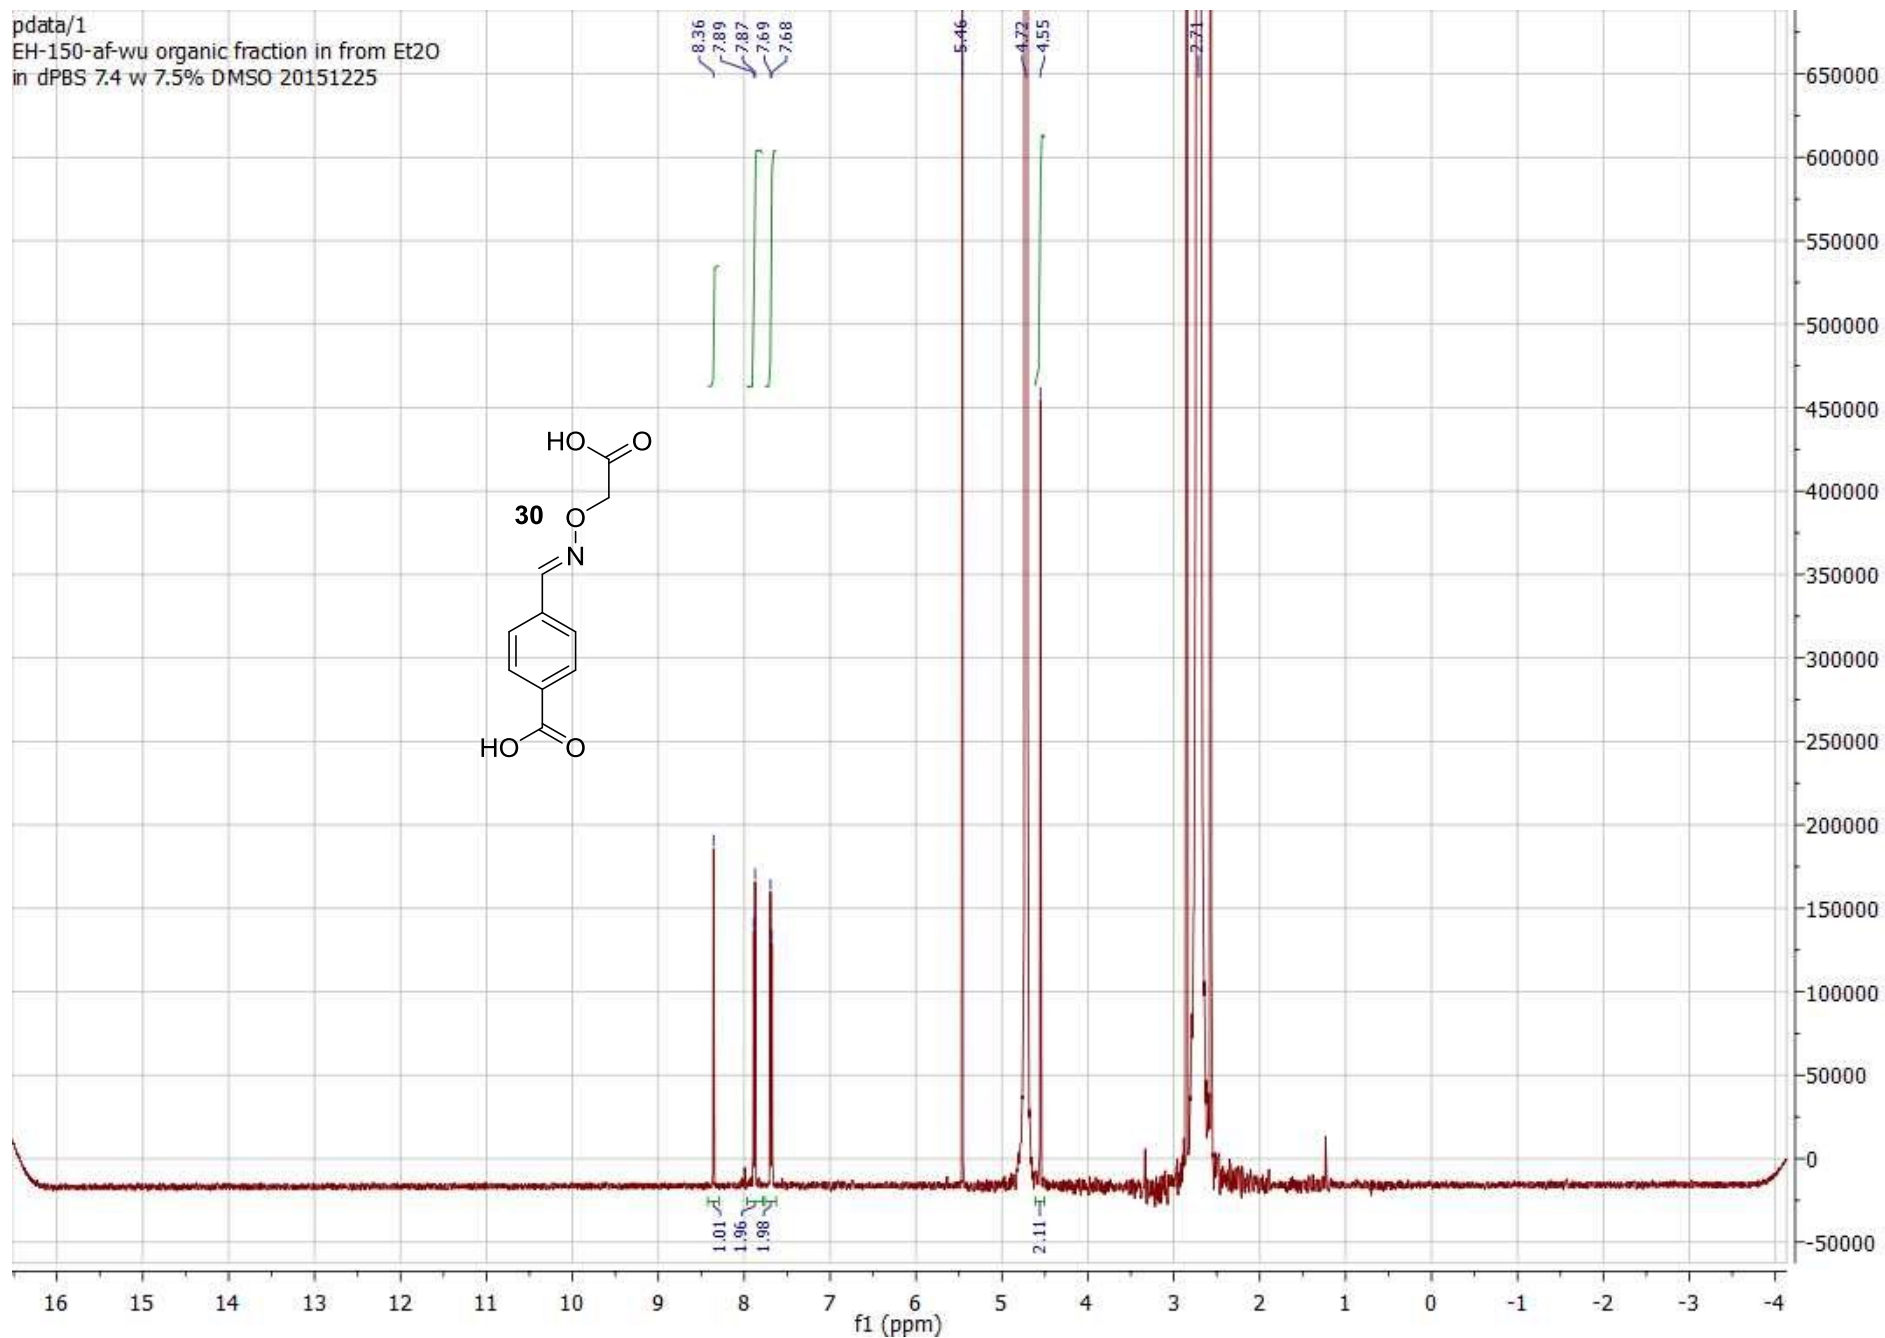

Compound **30** - MS (ESI-):  $m/z$  calc. for  $C_{10}H_8NO_5^-$ : 222.04; found: 221.949  $[M - H]^-$ .

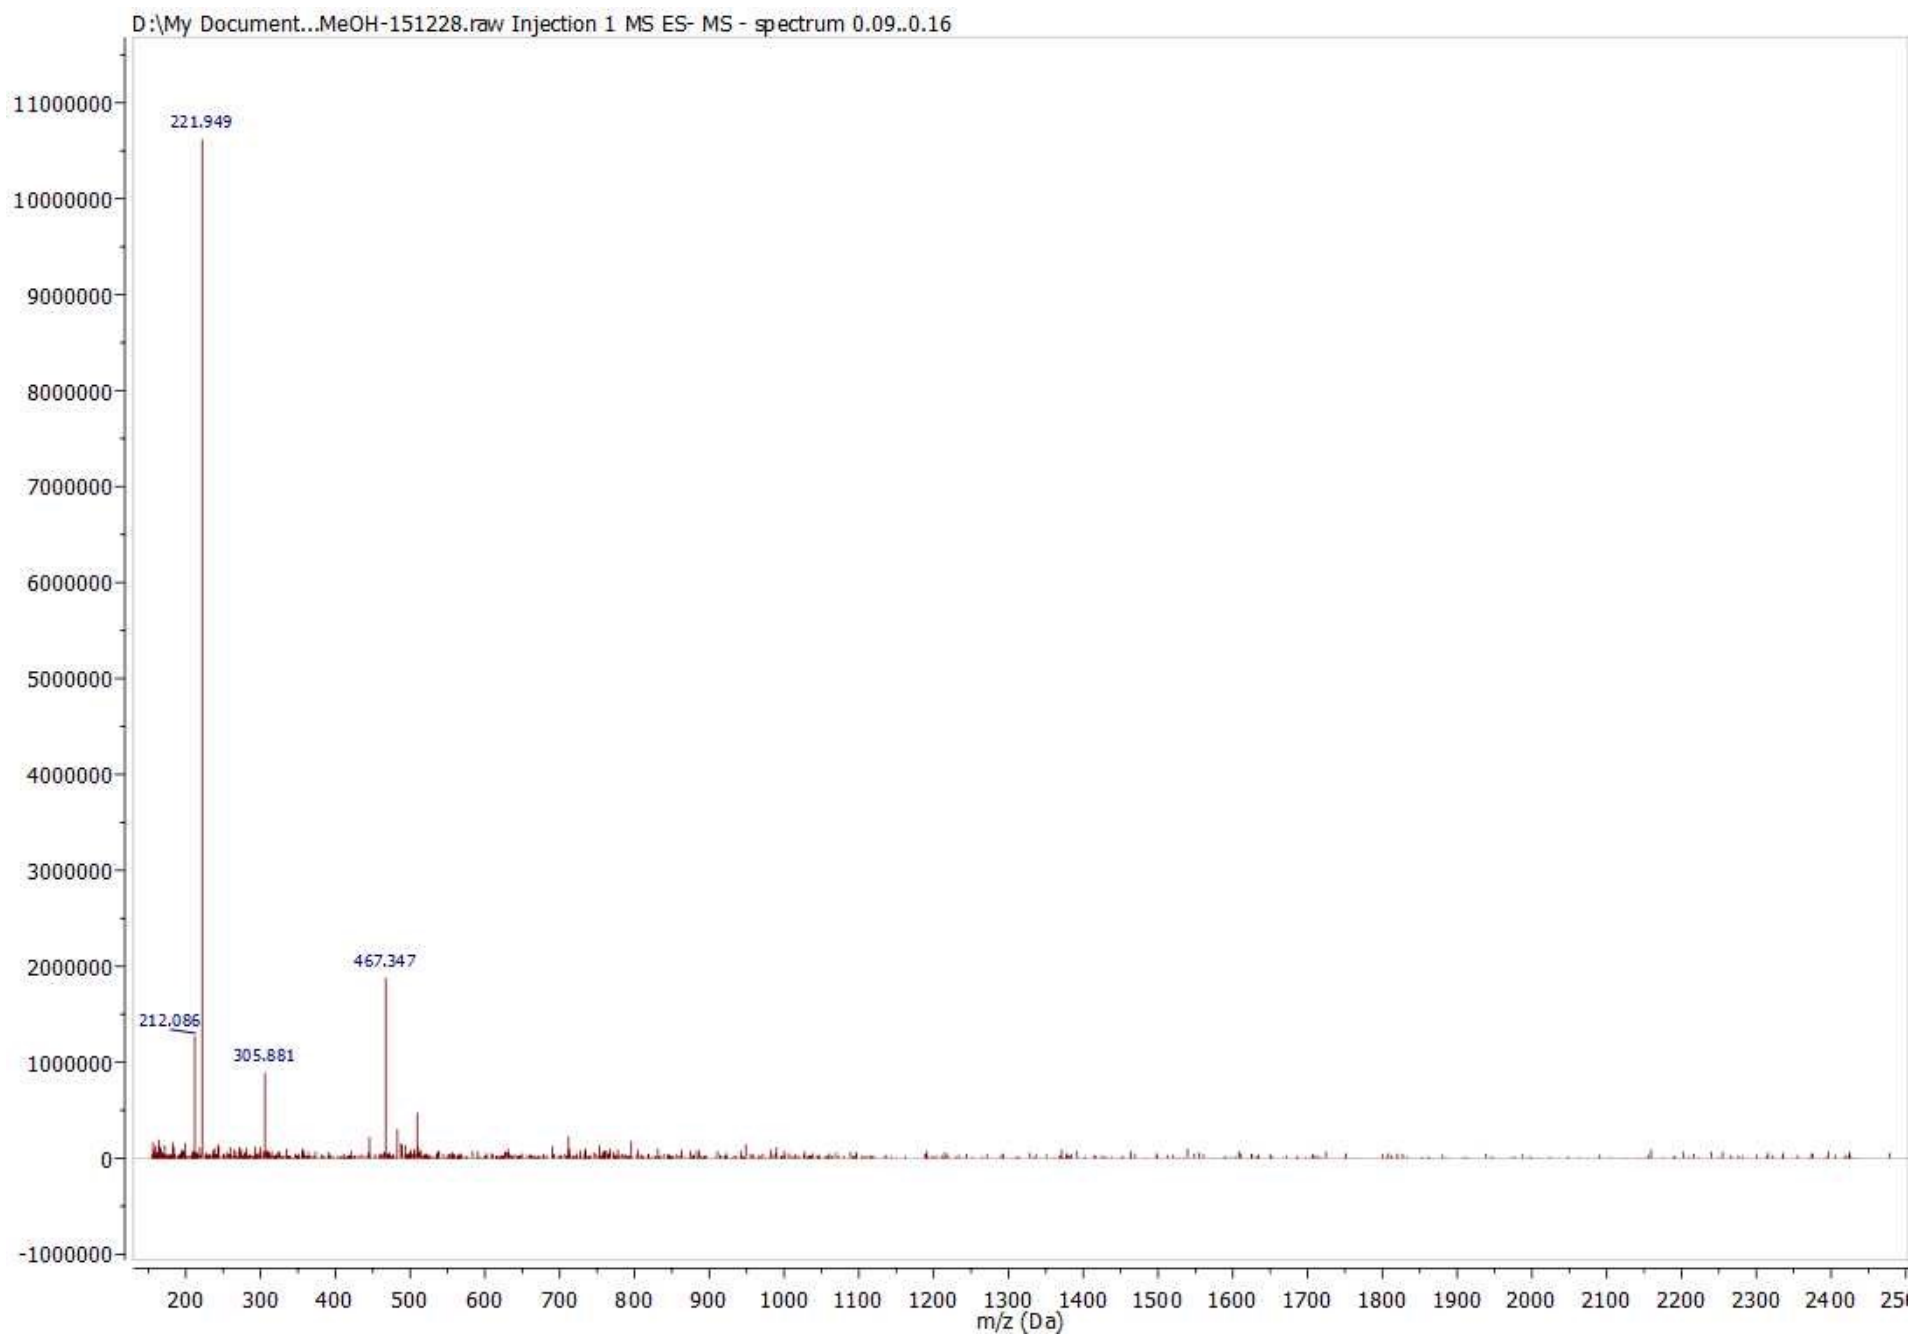

$^1\text{H}$  NMR spectra of the oxime bond formation reaction between 4-formylbenzoic acid and (aminoxy)acetic acid hemihydrochloride with 10 mM 4-aminophenol in dPBS (pH 7.4) with 7.5% DMSO (v/v)

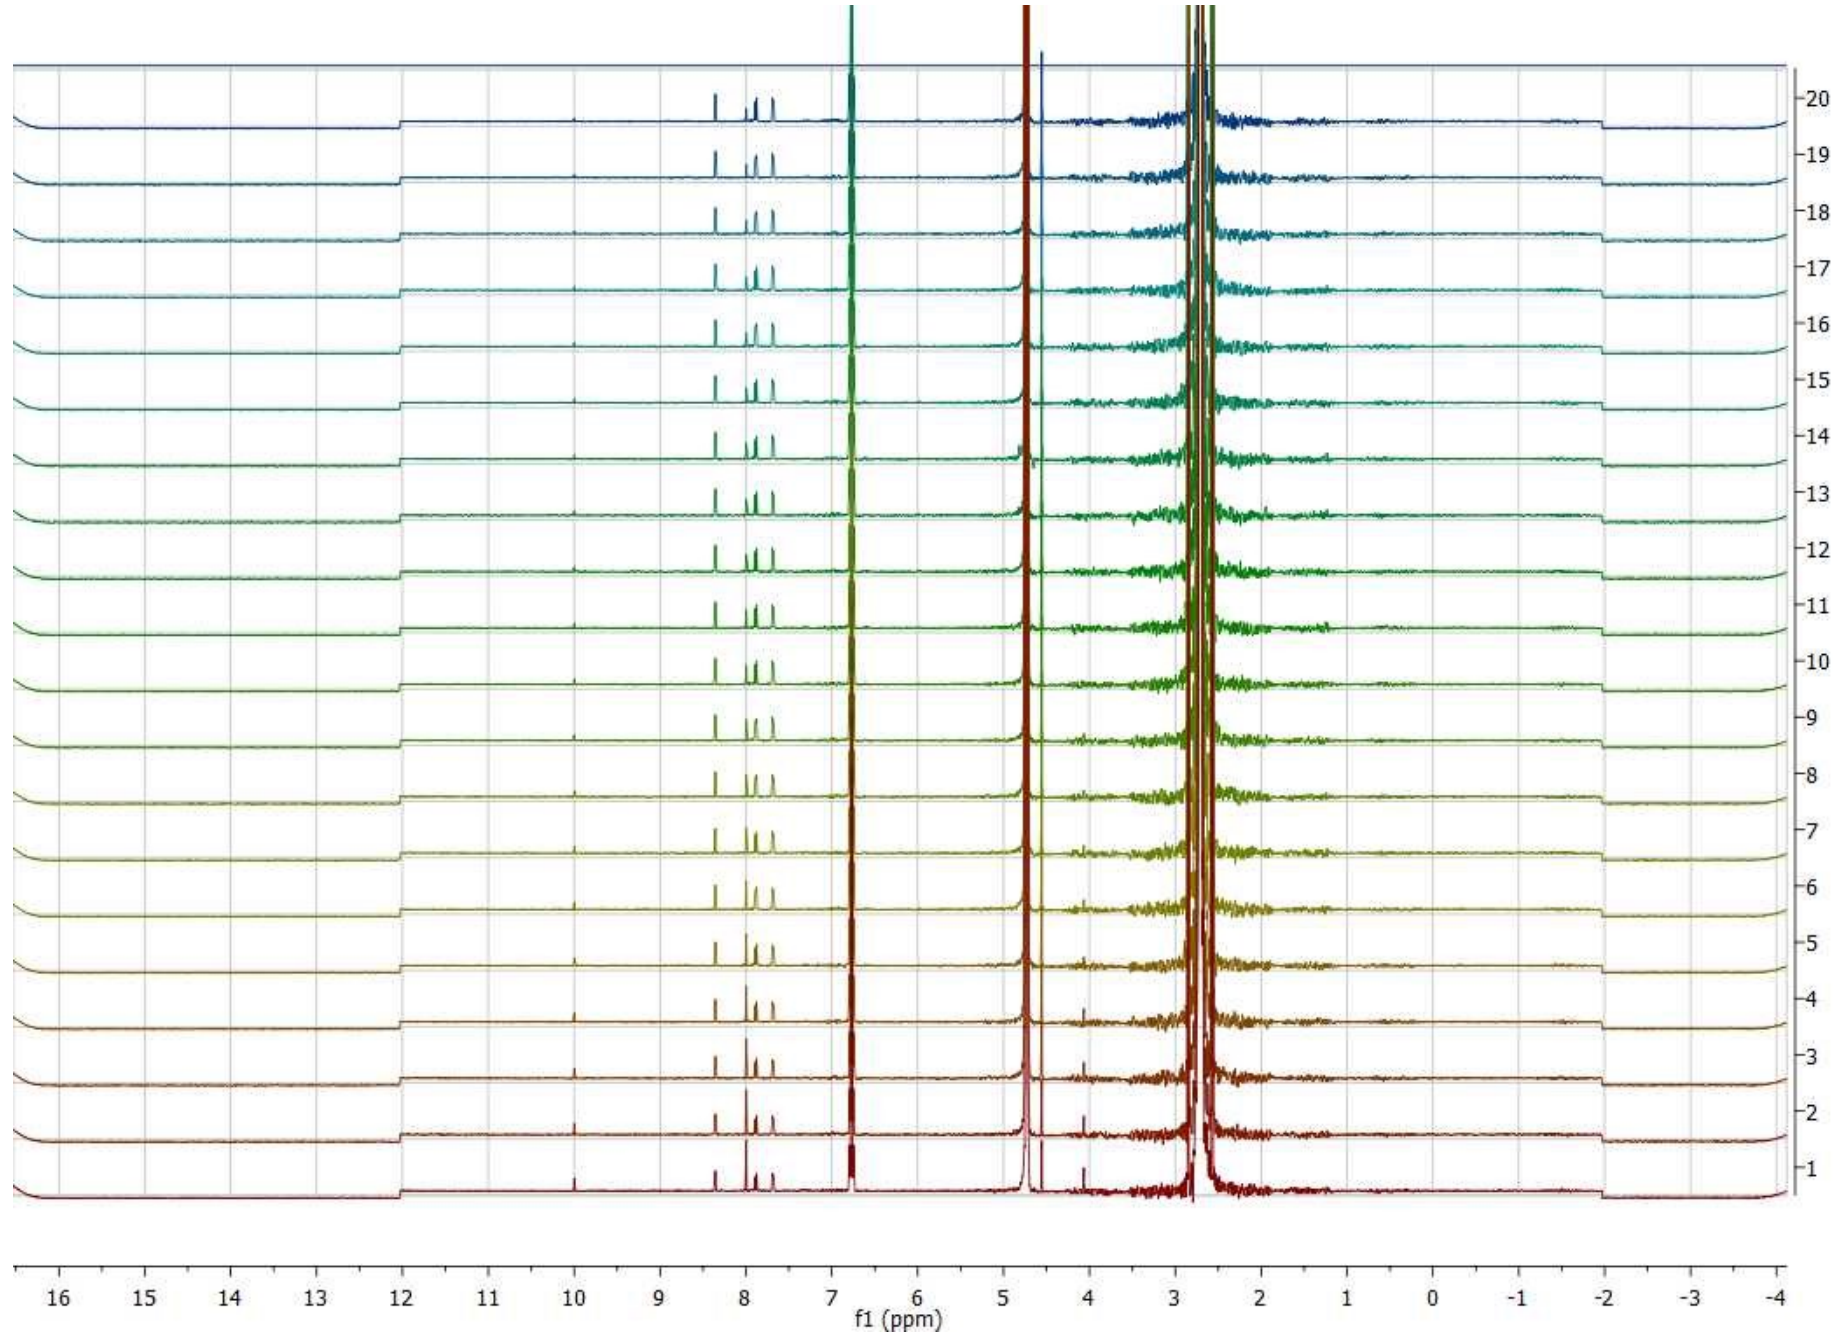

$^1\text{H}$  NMR spectra of the oxime bond formation reaction between 4-formylbenzoic acid and (aminoxy)acetic acid hemihydrochloride with 10 mM aniline in dPBS (pH 7.4) with 7.5% DMSO (v/v)

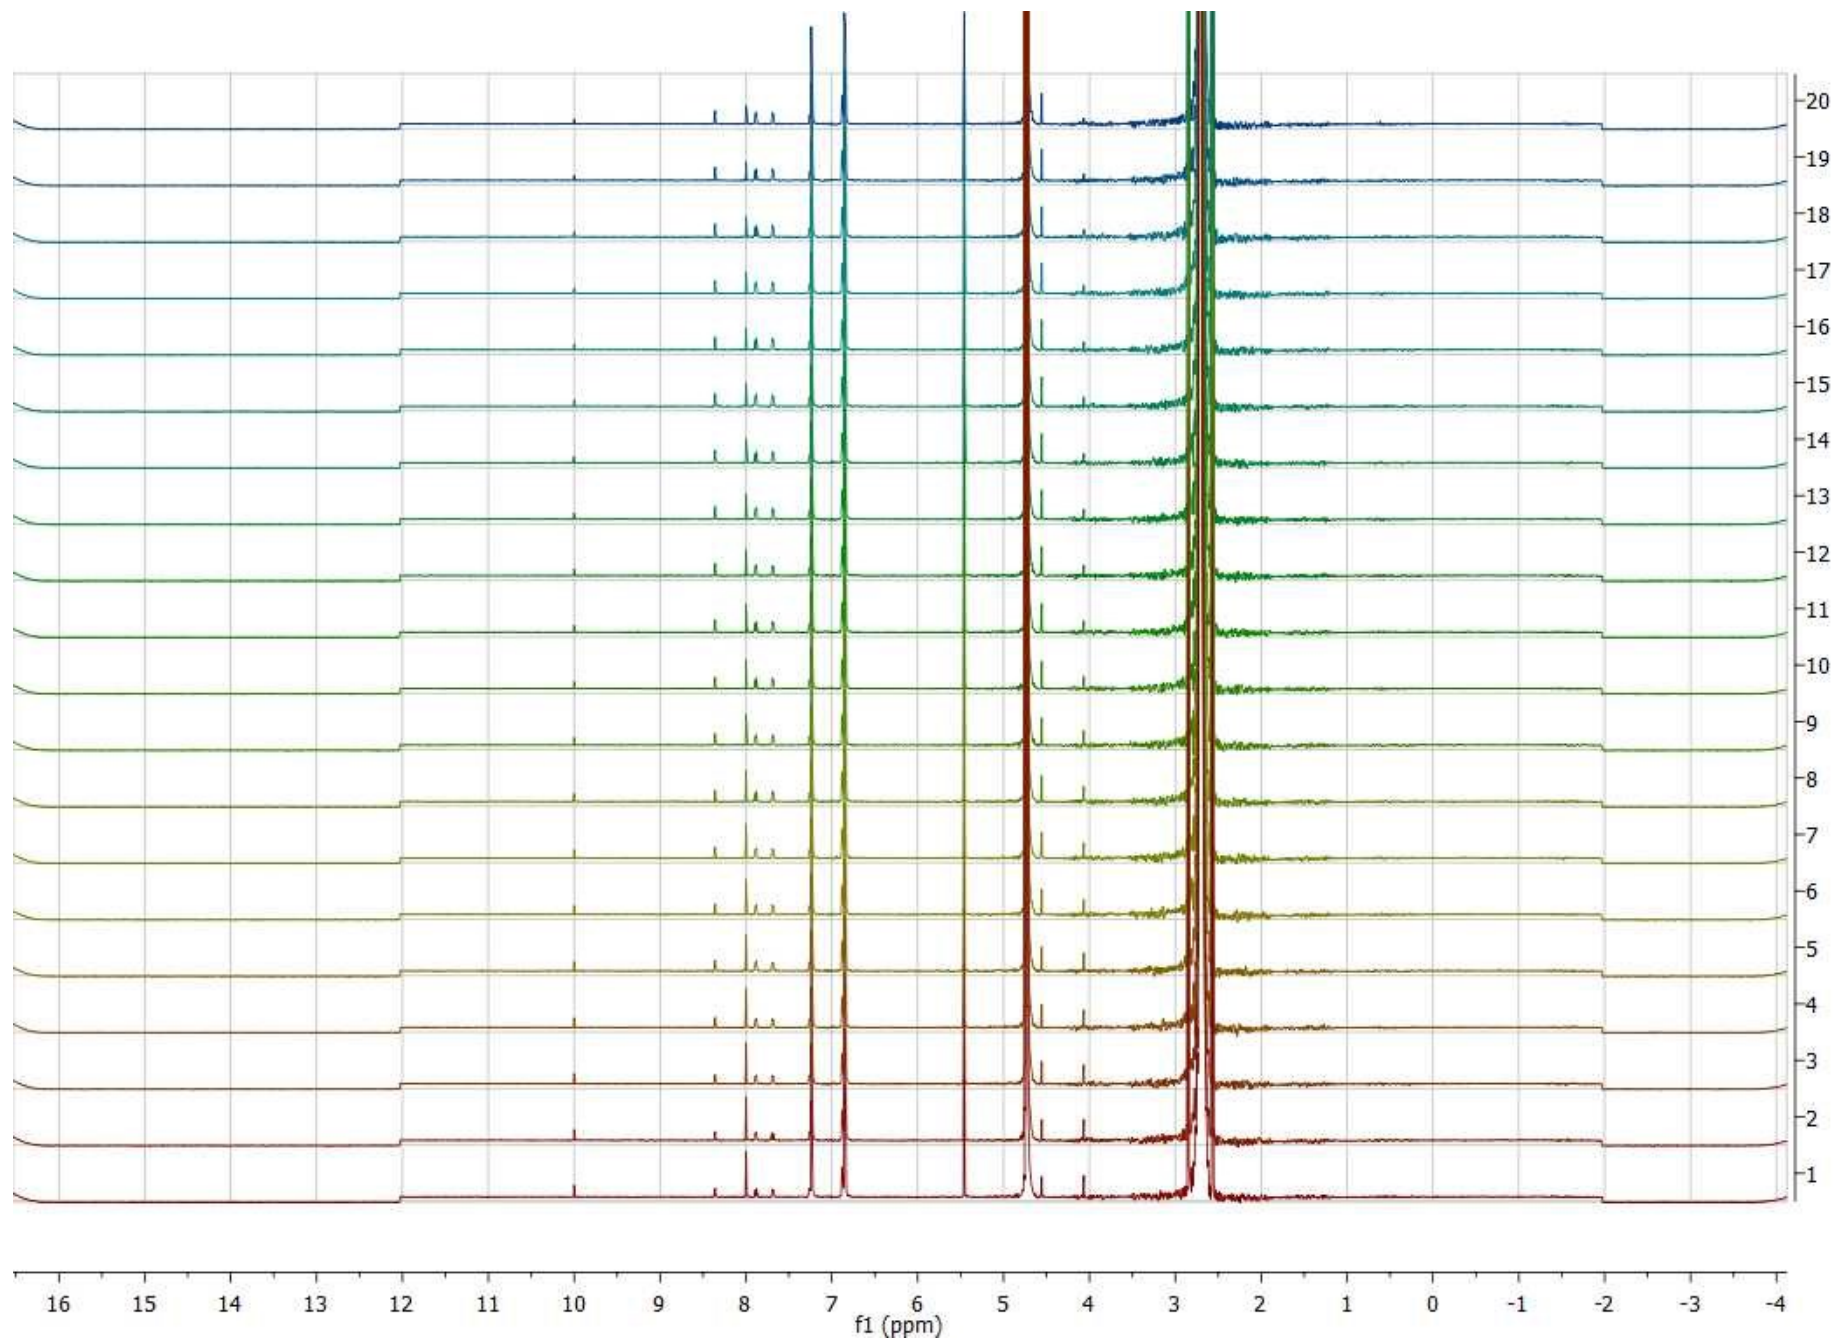

$^1\text{H}$  NMR spectra of the oxime bond formation reaction between 4-formylbenzoic acid and (aminoxy)acetic acid hemihydrochloride with no catalyst in dPBS (pH 7.4) with 7.5% DMSO (v/v)

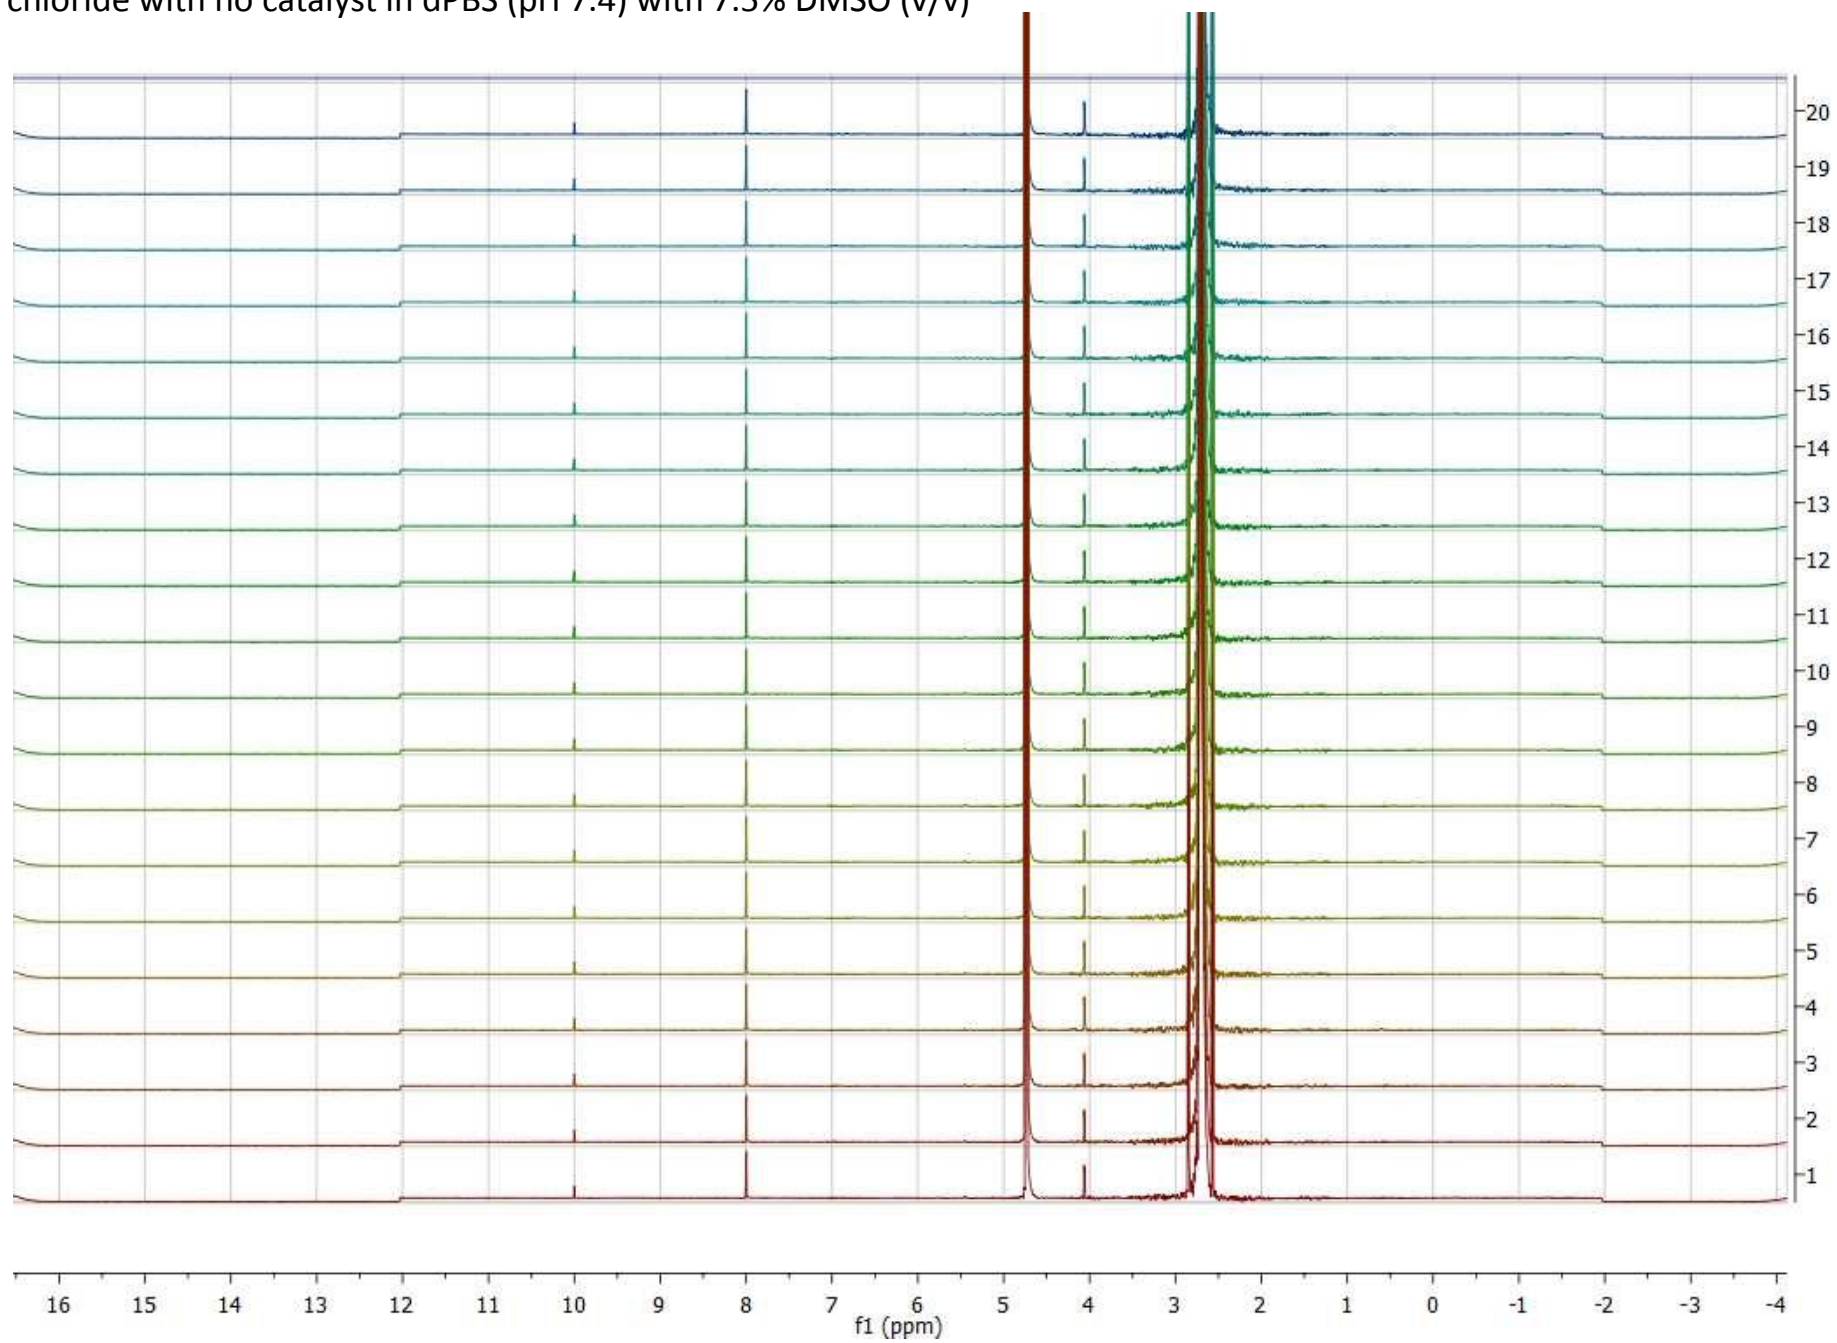

Supplement: c5ob02127h1.pdf [file c5ob02127h1.pdf]
